# Supplementary material for: Evaluation of large language models as a diagnostic aid for complex medical cases
Source: Front Med (Lausanne). 2024 Jun 20;11:1380148. doi: 10.3389/fmed.2024.1380148 (PMC11222590; doi:10.3389/fmed.2024.1380148)
Supplement: Supplementary file 1 [file Table_1.XLSX]

## Sheet: Sheet1
Case	Case presentation	Differential	Final Diagnosis	ChatGPT Prompt	gpt3.5_res1	Correct 1_yes 0_no	Order	Out of how many answers	gpt3.5_res2	Correct 1_yes 0_no	Order	Out of how many answers	gpt3.5_res3	Correct 1_yes 0_no	Order	Out of how many answers	gpt3.5_res4	Correct 1_yes 0_no	Order	Out of how many answers	gpt4_res1	Correct 1_yes 0_no	Order	Out of how many answers	gpt4_res2	Correct 1_yes 0_no	Order	Out of how many answers	gpt4_res3	Correct 1_yes 0_no	Order	Out of how many answers	gpt4_res4	Correct 1_yes 0_no	Order	Out of how many answers		incidence	pubmed alt diagnosis	pubmed_new	citations for the incidence
Case 1-2022	A 67-year-old man was evaluated in the sleep clinic at this hospital because of odd behaviors during sleep, daytime sleepiness, and apnea detected on a home sleep study. Three years before the current evaluation, the patient‚Äôs wife noticed that the patient had vocalizations, including talking and yelling, while sleeping. He also had thrashing movements while sleeping; he fell out of bed more th…	Differential Diagnosis Dr. Aleksandar Videnovic: I evaluated this patient when he was referred to the sleep clinic, and I am aware of the final diagnosis in this case. After I was asked to see this 67-year-old man with progressive motor neuron disease, my initial thoughts were centered around the detection of sleep-disordered breathing on a home sleep-apnea test, along with his previous diagnosis…	Anti-IgLON5 IgG associated neurologic disorder.	Please read the following case, and provide a thorough and specific list of differential diagnosis for the underlying cause of this presentation. Please list the diagnosis that most explains all the features of the presentation first, and include rare diagnoses if they are the best explanation for the presentation. "A 67-year-old man was evaluated in the sleep clinic at this hospital because of o…	1. REM sleep behavior disorder 2. Frontotemporal dementia (FTD) 3. Lewy body dementia 4. Multiple system atrophy (MSA) 5. Progressive supranuclear palsy (PSP) 6. Idiopathic Parkinson‚Äôs disease 7. Motor neuron disease 8. Obstructive sleep apnea (OSA) 9. Cardiovascular disease 10. Diabetes mellitus 11. Chronic obstructive pulmonary disease (COPD) 12. Side effects of medications 13. Paraneoplastic…	0		29	Based on the symptoms presented, the following are the possible differential diagnoses: REM sleep behavior disorder (RBD) Obstructive sleep apnea (OSA) Narcolepsy Idiopathic hypersomnia Insomnia Restless leg syndrome (RLS) Motor neuron disease (MND) Spinocerebellar ataxia (SCA) Progressive supranuclear palsy (PSP) Multiple system atrophy (MSA) Lewy body dementia (LBD) Stroke Alzheimer's disease T…	0		13	1. Rapid eye movement (REM) sleep behavior disorder 2. Motor neuron disease (specifically bulbar onset amyotrophic lateral sclerosis) 3. Obstructive sleep apnea (OSA) 4. Stroke or other cerebrovascular event 5. Diabetic neuropathy (related to type 2 diabetes mellitus) 6. Central sleep apnea 7. Seizure disorder 8. Neurodegenerative disorders such as Parkinson's disease or multiple system atrophy 9…	0		18	Differential diagnosis for the underlying cause of this presentation: 1. REM sleep behavior disorder (RBD) 2. Obstructive sleep apnea syndrome (OSAS) 3. Neurodegenerative disorder: Multiple system atrophy (MSA) 4. Neurodegenerative disorder: Progressive supranuclear palsy (PSP) 5. Neurodegenerative disorder: Corticobasal degeneration (CBD) 6. Narcolepsy with cataplexy 7. Hypersomnia due to medica…	0		18	Sleep-related hypermotor epilepsy (SHE): Although this condition is characterized by abnormal motor behaviors during sleep, the patient's clinical presentation, including the lack of epileptiform abnormalities on EEG and resolution of abnormal movements with melatonin and trazodone, makes it less likely. Narcolepsy: The patient's episodes of excessive daytime sleepiness and falling asleep during …	0		8	Based on the clinical presentation, the following differential diagnoses can be considered in order of likelihood: Rapid Eye Movement (REM) Sleep Behavior Disorder (RBD) with comorbid Obstructive Sleep Apnea (OSA): The patient's odd behaviors during sleep, vocalizations, thrashing movements, and apnea detected on a home sleep study are consistent with RBD and OSA. Narcolepsy with cataplexy: The e…	0		9	1. Progressive motor neuron disease: This diagnosis explains the patient's progressive gait imbalance, hand clumsiness, hoarse voice, dysphagia, and widespread muscle involvement with chronic reinnervation changes on electromyography. 2. Obstructive sleep apnea: This diagnosis accounts for the patient's apnea, snoring, and sleep-disordered breathing with an apnea-hypopnea index of 20 events per h…	0		7	1. Sleep-related hypermotor epilepsy (SHE): This diagnosis explains the patient's abnormal behaviors during sleep, daytime sleepiness, and unresponsiveness to sternal rub. However, it does not account for the motor neurologic syndrome and apnea. 2. Obstructive sleep apnea (OSA): This diagnosis accounts for the patient's apnea, snoring, daytime sleepiness, and difficulty with sleep initiation. It …	0		8		6.67e-06	Anti-IgLON5 IgG associated neurologic disorder.	6	https://www.ncbi.nlm.nih.gov/pmc/articles/PMC8921982/
Case 1-2023	A 49-year-old man was admitted to this hospital because of hypokalemia and paranoid thoughts. Six months before the current admission, discomfort on the right side of the chest developed, and the patient was evaluated at another hospital. Computed tomography (CT) of the chest (Figure 1), performed after the administration of intravenous contrast material, revealed a nodule in the upper lobe of th…	Differential Diagnosis Dr. Chad W. Vokoun: This 49-year-old man had recently received a diagnosis of small-cell lung cancer. He had pursued alternative treatment and then presented to this hospital with evidence of metastatic disease. There was also hypokalemia, hypertension, proximal muscle weakness, and darkening of his skin. Altered mental status with paranoia prompted family members to bring …	Cushing's syndrome due to ectopic secretion of adrenocorticotropic hormone from small-cell lung cancer.	Please read the following case, and provide a thorough and specific list of differential diagnosis for the underlying cause of this presentation. Please list the diagnosis that most explains all the features of the presentation first, and include rare diagnoses if they are the best explanation for the presentation. "A 49-year-old man was admitted to this hospital because of hypokalemia and parano…	1. Metastatic small-cell lung cancer 2. Thrombotic thrombocytopenic purpura 3. Electrolyte disturbances 4. Hepatocellular carcinoma 5. Adrenal mass 6. Non-Hodgkin‚Äôs lymphoma recurrence 7. Depression or other psychiatric disorder 8. Paraneoplastic syndrome 9. Multiple organ failure 10. Delirium due to dehydration or other metabolic disturbances	1	8	10	Differential diagnosis for the underlying cause of the presentation: Small-cell lung cancer with associated paraneoplastic syndrome, such as ectopic adrenocorticotropic hormone (ACTH) production or Lambert-Eaton myasthenic syndrome (LEMS). Hepatic metastases from small-cell lung cancer with associated hypercalcemia, leukocytosis, and thrombosis. Systemic lupus erythematosus with associated pleuri…	1	1	10	Differential diagnosis for the underlying cause of this presentation includes: 1. Small-cell lung cancer with paraneoplastic syndrome leading to hypokalemia, altered mental status, and leg swelling 2. Metastatic cancer spreading to the liver, adrenal gland, and portal vein causing hypokalemia, fatigue, weight loss, and weakness 3. Adrenal insufficiency due to metastasis, leading to hypokalemia, f…	1	1	10	Differential Diagnosis for the underlying cause of the presentation of a 49-year-old man with hypokalemia and paranoid thoughts, along with a medical history of non-Hodgkin lymphoma, small-bowel resection, and deep-vein thrombosis, and the following symptoms and findings: Unilateral pulmonary mass (increased in size) with mediastinal and hilar lymphadenopathy Hypokalemia Symmetric 1+ edema in bot…	1	14	24	Based on the provided case presentation, the following is a list of differential diagnoses for the underlying cause of the patient's presentation, starting with the most likely explanation for the majority of the clinical features: Paraneoplastic syndrome related to small-cell lung cancer (SCLC): The presence of hypokalemia, hyperpigmentation, and psychiatric symptoms may be suggestive of a paran…	1	2	7	Paraneoplastic syndrome related to small-cell lung cancer (SCLC): This diagnosis is the most likely explanation for the patient's presentation, considering his known SCLC, hypokalemia, psychiatric symptoms (paranoid thoughts, agitation), and muscle weakness. Paraneoplastic syndromes can cause endocrine, neurologic, and hematologic manifestations due to ectopic hormone production or immune-mediate…	1	1	8	1. Paraneoplastic syndrome (specifically, ectopic corticotropin [ACTH] syndrome) related to small-cell lung cancer: This diagnosis would explain the patient's hypokalemia, paranoid thoughts, the rapid worsening of his lung mass, limb swelling, hyperpigmentation, and resistant hypertension. 2. Adrenal metastasis from small-cell lung cancer: This could lead to adrenal insufficiency or hormone overp…	1	1	10	1. Paraneoplastic syndrome associated with small cell lung cancer: This diagnosis could explain the hypokalemia and paranoid thoughts as well as the patient's lung mass, enlarged mediastinal and hilar lymphadenopathy, and multiple organ involvement. 2. Syndrome of inappropriate antidiuretic hormone secretion (SIADH): This could contribute to the patient's hyponatremia, which might cause altered m…	1	2	7		1e-06	Ectopic ACTH syndrome	2081	https://www.orpha.net/en/disease/detail/99889
Case 10-2022	A 78-year-old man was evaluated in the cardiology clinic of this hospital because of biventricular myocardial wall thickening, progressive mitral regurgitation, and ventricular arrhythmias. The patient had been a distinguished multisport athlete in high school and college. However, in his 20s, he found that he was unable to perform competitively, and he noticed that he did not sweat as much as hi…	Differential Diagnosis Figure 2. Echocardiograms. Dr. Patricia A. Pellikka: This 78-year-old man presented for evaluation of chronic ventricular myocardial wall thickening, mitral regurgitation, and recurrent ventricular tachyarrhythmias. In determining the process underlying his cardiomyopathy, it is important to consider the clues from the echocardiograms in the context of the history and findi…	Fabry's disease.	Please read the following case, and provide a thorough and specific list of differential diagnosis for the underlying cause of this presentation. Please list the diagnosis that most explains all the features of the presentation first, and include rare diagnoses if they are the best explanation for the presentation. "A 78-year-old man was evaluated in the cardiology clinic of this hospital because…	1. Hypertrophic cardiomyopathy 2. Restrictive cardiomyopathy 3. Infiltrative cardiomyopathy (amyloidosis, sarcoidosis) 4. Ischemic cardiomyopathy 5. Valvular heart disease (mitral stenosis, aortic stenosis) 6. Congenital heart disease (univentricular heart, atrial/ventricular septal defect) 7. Arrhythmogenic right ventricular cardiomyopathy 8. Idiopathic dilated cardiomyopathy 9. Chagas disease 1…	1	11	14	Hypertrophic cardiomyopathy (HCM): This is a genetic disorder that causes thickening of the heart muscle, especially in the left ventricle. The presentation of myocardial wall thickening, mitral regurgitation, and ventricular arrhythmias is consistent with this condition. Amyloidosis: This is a rare disorder that occurs when abnormal proteins build up in organs and tissues. The heart is a common …	1	3	9	1. Hypertrophic cardiomyopathy 2. Secondary cardiomyopathy due to aortic valve disease or chronic total occlusion of the distal left anterior descending artery 3. Primary mitral valve disease (e.g. mitral valve prolapse, rheumatic heart disease) 4. Arrhythmogenic right ventricular cardiomyopathy 5. Infiltrative cardiomyopathy (e.g. amyloidosis, sarcoidosis) 6. Restrictive cardiomyopathy (e.g. Fab…	1	6	20	Hypertrophic cardiomyopathy Cardiac amyloidosis Fabry disease Danon disease Noonan syndrome Friedreich ataxia Loeffler endocarditis Glycogen storage disease type II (Pompe disease) Becker muscular dystrophy Emery-Dreifuss muscular dystrophy	1	3	10	Based on the provided case presentation, the following is a list of differential diagnoses for the underlying cause of this presentation: Amyloidosis (cardiac amyloidosis): This diagnosis best explains the patient's biventricular myocardial wall thickening, progressive mitral regurgitation, and ventricular arrhythmias. The patient's age, history of heart failure, renal insufficiency, and other sy…	1	3	7	Based on the provided case presentation, the following differential diagnoses can be considered, starting with the most likely explanation for the patient's presentation: Cardiac amyloidosis (most likely ATTR variant): The patient's age, biventricular wall thickening, progressive mitral regurgitation, ventricular arrhythmias, and history of exertional dyspnea, along with the family history of hyp…	1	3	6	1. Hypertrophic cardiomyopathy: This diagnosis best explains the patient's history of increased myocardial wall thickness, mitral valve thickening, arrhythmias, and family history (sister and niece) of hypertrophic cardiomyopathy. 2. Amyloidosis: This diagnosis should be considered due to the patient's biventricular wall thickening, mitral valve thickening, arrhythmias, renal insufficiency, and s…	1	3	7	1. Amyloidosis (light-chain or transthyretin-related) - This diagnosis best explains the patient's multisystem involvement: biventricular myocardial wall thickening, progressive mitral regurgitation, ventricular arrhythmias, reduced sweating, chronic dry eyes, reduced hearing, tinnitus, and renal insufficiency. 2. Hypertrophic cardiomyopathy - This was initially considered in the patient's 20s, b…	1	4	7		1e-05	Fabry's disease	5680	https://www.ncbi.nlm.nih.gov/books/NBK435996/
Case 10-2023	A 27-year-old man was admitted to this hospital because of convulsions. The patient had been in his usual state of health until 2 years before this admission, when shaking of the trunk, arms, and legs occurred. The episode lasted approximately 4 to 5 minutes and had been preceded by a sharp pain in the back of the head that radiated to the neck, blurred vision, palpitations, nausea, and difficult…	Differential Diagnosis Dr. David L. Perez: I participated in the care of this patient, and I am aware of the final diagnosis. In this 27-year-old man, paroxysmal neurologic events with convulsions had occurred since he was 25 years of age. In developing a differential diagnosis, I will consider neurologic, medical, and psychiatric causes. In particular, I will discuss conditions in five broad dia…	Functional seizures.	Please read the following case, and provide a thorough and specific list of differential diagnosis for the underlying cause of this presentation. Please list the diagnosis that most explains all the features of the presentation first, and include rare diagnoses if they are the best explanation for the presentation. "A 27-year-old man was admitted to this hospital because of convulsions. The patie…	1. Epileptic seizures 2. Non-epileptic seizures (psychogenic seizures/syncope) 3. Traumatic brain injury (TBI) 4. Drug or alcohol withdrawal 5. Electrolyte abnormalities 6. Brain infection (encephalitis/meningitis) 7. Brain tumor 8. Stroke 9. Metabolic disorder (porphyria, mitochondrial disease) 10. Psychiatric conditions (conversion disorder, dissociative disorder, factitious disorder). The diag…	0		10	The differential diagnosis for the underlying cause of the patient's presentation includes: Epilepsy: This is the most likely diagnosis, given the patient's history of convulsions, the use of anti-epileptic medications, and the lack of any other apparent cause. Focal cortical dysplasia: This is a type of brain abnormality that can cause epilepsy and is often difficult to detect on imaging studies…	1	7	13	1. Epilepsy (most likely) 2. Idiopathic Epilepsy 3. Traumatic Brain Injury 4. Brain Tumor 5. Stroke 6. Meningitis 7. Encephalitis 8. Neurosyphilis 9. Heat Stroke 10. Neurocysticercosis 11. Hypoglycemia 12. Alcohol Withdrawal 13. Wilson‚Äôs Disease 14. Prion Disease 15. Migraine with aura 16. Syncope 17. Cardiac Arrhythmia 18. Drug Hypersensitivity 19. Toxin Exposure 20. Metabolic Disorder 21. Con…	0		22	Based on the presented case, the following is a list of differential diagnoses for the underlying cause of the patient's presentation: Epilepsy: Epilepsy is the most likely diagnosis, given the patient's convulsive episodes, which are recurrent, last for several minutes, and have not been attributed to any other cause. The failure of treatment with antiepileptic medications is not uncommon, and f…	1	2	11	Based on the provided case, the following is a list of differential diagnoses for the underlying cause of this presentation, ordered from the most likely to the least likely explanation: Psychogenic non-epileptic seizures (PNES): The convulsive episodes improved when the physician's hand was placed on the patient's shoulder and worsened when removed, the patient's eyes were closed but did not sho…	1	1	7	Based on the provided case information, here is a list of differential diagnoses in order of relevance: Psychogenic non-epileptic seizures (PNES): The patient's history of childhood trauma, PTSD, panic disorder, and depressive disorder, combined with the description of convulsive episodes that can be altered by physical touch or eye manipulation, suggest that PNES could be the most likely diagnos…	1	1	8	1. Psychogenic non-epileptic seizures (PNES) - this diagnosis would most explain the entire clinical presentation, especially considering the episodic nature of convulsions, the positive response to a physician's hand on the shoulder, and the patient's background of PTSD and depression. 2. Inadequate management of epilepsy - although the patient did not respond to levetiracetam and lamotrigine, i…	1	1	8	1. Psychogenic non-epileptic seizures (PNES): This diagnosis best explains most of the features of the patient's presentation, especially considering the history of post-traumatic stress disorder (PTSD), panic disorder, and major depressive disorder. The stopping and resuming of movements with touch and following of simple verbal commands during episodes also suggests PNES. 2. Epilepsy: The histo…	1	1	7		88908	1	0.75	https://www.ncbi.nlm.nih.gov/pmc/articles/PMC7772716/
Case 11-2022	An 80-year-old woman was admitted to this hospital because of pancytopenia and the identification of schistocytes on a peripheral-blood smear. Six weeks before admission to this hospital, nausea, vomiting, and diarrhea developed, along with chills and subjective fever. The symptoms resolved after 4 days without specific intervention, but then intermittent dysphagia with solid foods and early sati…	Differential Diagnosis Dr. Rebecca K. Leaf: This 80-year-old woman, in whom anemia and thrombocytopenia had been detected 1 year earlier, was admitted to another hospital with a 5-week history of fatigue and weight loss. She was found to have pancytopenia as well as schistocytes on a peripheral-blood smear. Plasma exchange was initiated for a presumed diagnosis of TTP. When evaluating a patient w…	Myelodysplastic syndrome.	Please read the following case, and provide a thorough and specific list of differential diagnosis for the underlying cause of this presentation. Please list the diagnosis that most explains all the features of the presentation first, and include rare diagnoses if they are the best explanation for the presentation. "An 80-year-old woman was admitted to this hospital because of pancytopenia and th…	Differential diagnosis for the underlying cause of this presentation: 1. Thrombotic thrombocytopenic purpura (TTP) 2. Systemic lupus erythematosus (SLE) 3. Hemolytic uremic syndrome (HUS) 4. Idiopathic thrombocytopenic purpura (ITP) 5. Drug-induced thrombocytopenia 6. Viral infection (e.g. Epstein-Barr virus) 7. Fungal infection (e.g. candida) 8. Malignancy (e.g. leukemia, lymphoma) 9. Autoimmune…	1	17	17	Thrombotic thrombocytopenic purpura (TTP) Hemolytic uremic syndrome (HUS) Disseminated intravascular coagulation (DIC) Sepsis with microangiopathic hemolytic anemia (MAHA) Systemic lupus erythematosus (SLE) Antiphospholipid syndrome (APS) Autoimmune hemolytic anemia (AIHA) Paroxysmal nocturnal hemoglobinuria (PNH) Myelodysplastic syndrome (MDS) Leukemia Lymphoma Multiple myeloma Metastatic cancer…	1	9	20	1. Thrombotic thrombocytopenic purpura (TTP) 2. Disseminated intravascular coagulation (DIC) 3. Hemolytic uremic syndrome (HUS) 4. Systemic lupus erythematosus (SLE) 5. Infection (viral, bacterial, fungal) 6. Malignancy (lymphoma, leukemia) 7. Myelodysplastic syndrome (MDS) 8. Aplastic anemia 9. Radiation exposure 10. Chemical exposure 11. Medication-induced hemolysis (i.e. antibiotics, chemother…	1	7	15	Thrombotic thrombocytopenic purpura (TTP): TTP is a rare blood disorder that causes the formation of small blood clots in blood vessels throughout the body. It can present with symptoms such as fever, fatigue, neurological abnormalities, and pancytopenia. The presence of schistocytes on the peripheral blood smear is also characteristic of TTP. Disseminated intravascular coagulation (DIC): DIC is …	0		9	Based on the presentation and the available information, the following differential diagnoses can be considered: Thrombotic thrombocytopenic purpura (TTP): The presence of schistocytes on peripheral blood smear, pancytopenia, fatigue, and confusion in this patient suggest the possibility of TTP. The patient's response to plasma exchange also supports this diagnosis. Atypical hemolytic uremic synd…	1	5	8	Based on the provided case presentation, the following differential diagnoses should be considered: Thrombotic Thrombocytopenic Purpura (TTP): This diagnosis is most consistent with the patient's clinical presentation, including pancytopenia, schistocytes on peripheral-blood smear, and neurological symptoms (confusion). The initiation of plasma exchange supports this diagnosis. Hemolytic Uremic S…	0		8	1. Thrombotic thrombocytopenic purpura (TTP) 2. Disseminated intravascular coagulation (DIC) 3. Hemolytic-uremic syndrome (HUS) 4. Cancer-associated hemolytic anemia 5. Infection-related hemolytic anemia (e.g. babesiosis or anaplasmosis) 6. Autoimmune hemolytic anemia (with positive Coombs' test) 7. Paroxysmal nocturnal hemoglobinuria (PNH) 8. Myelodysplastic syndrome with associated peripheral c…	1	8	16	1. Thrombotic thrombocytopenic purpura (TTP) - the presence of pancytopenia, schistocytes on peripheral blood smear, fever, and neurological symptoms are highly suggestive of TTP. 2. Hemolytic uremic syndrome (HUS) - although the patient has normal kidney function, the presence of pancytopenia and schistocytes warrants consideration of HUS. 3. Disseminated intravascular coagulation (DIC) - sugges…	1	6	10		0.0003	Myelodysplastic syndrome	29969	https://www.ncbi.nlm.nih.gov/pmc/articles/PMC3394456/
Case 11-2023	A 67-year-old man was admitted to this hospital with hypoxemia. Six years before the current presentation, the patient was evaluated because of melena and anemia. Esophagogastroduodenoscopy revealed duodenal ulcers; biopsy of one of the ulcers revealed changes consistent with moderately differentiated adenocarcinoma. Computed tomography (CT) of the abdomen showed a locally invasive mass in the he…	Differential Diagnosis Dr. Eric P. Schmidt: This 67-year-old man with mantle-cell lymphoma and a history of pulmonary embolism was admitted to this hospital for hypoxemia that did not abate with the administration of supplemental oxygen. I will develop a differential diagnosis to identify the cause of hypoxemia, which can be broadly defined as a state of decreased oxygen content in the blood. If …	Dapsone-induced methemoglobinemia.	Please read the following case, and provide a thorough and specific list of differential diagnosis for the underlying cause of this presentation. Please list the diagnosis that most explains all the features of the presentation first, and include rare diagnoses if they are the best explanation for the presentation. "A 67-year-old man was admitted to this hospital with hypoxemia. Six years before …	1. Pulmonary embolism 2. Metastatic cancer (pancreatic adenocarcinoma, mantle-cell lymphoma) 3. Anemia (due to bleeding, malignancy, or marrow suppression from chemotherapy) 4. Pneumocystis jirovecii pneumonia 5. Cardiovascular disease (hypertension, coronary artery disease) 6. Deep vein thrombosis 7. Gastrointestinal bleeding 8. Hypoxemia due to respiratory diseases (asthma, COPD) or pulmonary i…	0		10	Differential diagnosis for the underlying cause of the presentation: Pulmonary embolism Metastatic adenocarcinoma to the lung Pneumocystis jirovecii pneumonia Methemoglobinemia Acute respiratory distress syndrome (ARDS) Congestive heart failure Myocardial infarction Atrial fibrillation with rapid ventricular response Sepsis Drug-induced lung injury Radiation pneumonitis Interstitial lung disease …	1	4	30	Differential diagnosis for the underlying cause of this presentation: 1. Pulmonary embolism 2. Deep vein thrombosis 3. Anemia of chronic disease 4. Infection (such as pneumonia) 5. Malignancy (such as lymphoma) 6. Gastrointestinal bleeding (such as from colon tumors or duodenal ulcers) 7. Chemotherapy-induced toxicity 8. Pulmonary metastasis 9. Hypersplenism (due to splenectomy) 10. Cardiac dysfu…	0		19	Differential Diagnosis for the underlying cause of the presentation: Pulmonary embolism Deep vein thrombosis Anemia of chronic disease Hemolysis (due to hereditary spherocytosis) Chemotherapy-induced anemia Gastrointestinal bleeding Pneumocystis jirovecii pneumonia Acute respiratory distress syndrome (ARDS) Sepsis Adenocarcinoma of the pancreas Metastasis from adenocarcinoma of the pancreas Mantl…	0		14	Based on the clinical presentation and history, the following differential diagnoses are listed in order of likelihood: Recurrent pulmonary embolism: The patient has a history of pulmonary embolism and deep-vein thrombosis, and the CT pulmonary angiography revealed filling defects consistent with pulmonary emboli. Additionally, the patient's symptoms of dyspnea and hypoxemia are consistent with t…	0		8	Based on the case presentation, the following is a list of differential diagnoses for the underlying cause of the patient's hypoxemia, ordered from the most likely to the least likely explanation for the presentation: Pulmonary embolism: The patient has a history of deep vein thrombosis (DVT) and segmental pulmonary embolism, and CT pulmonary angiography shows filling defects consistent with pulm…	0		8	1. Pulmonary embolism: Given the CT pulmonary angiography results, this is the most likely cause of the hypoxemia. The patient has a history of a previous pulmonary embolism and deep-vein thrombosis, which increases the risk of recurrence. 2. Chemotherapy-induced lung injury: Some chemotherapy drugs, such as cytarabine and cisplatin, have been associated with pulmonary toxicity. Given the recent …	0		10	1. Pulmonary embolism: The CT pulmonary angiography showed filling defects in the right upper lobe and both lower lobes, findings consistent with pulmonary emboli. The patient also had a history of pulmonary embolism and deep-vein thrombosis. 2. Pneumocystis jirovecii pneumonia: The patient was on dapsone prophylaxis and had a history of lymphoma and chemotherapy, which could increase the risk fo…	0		10		1e-06	Dapsone-induced methemoglobinemia	92	https://jamanetwork.com/journals/jamainternalmedicine/fullarticle/1673755
Case 12-2022	A 41-year-old woman with transient dysarthria and facial droop was transferred to this hospital for evaluation of masses on the mitral valve. Three weeks before this presentation, the patient presented to the emergency department of another hospital because of concerns about heavy vaginal bleeding that had developed 1 week earlier and was associated with crampy abdominal pain, fatigue, dyspnea, a…	Differential Diagnosis Dr. Mark A. Matza: The first step in developing a differential diagnosis in this case is to determine whether this patient‚Äôs presentation is related to an inflammatory condition or a noninflammatory condition. Noninflammatory disorders to consider include transient ischemic attack (TIA) or stroke due to atherosclerotic disease or embolism, culture-negative infective endoc…	Systemic lupus erythematosus with antiphospholipid syndrome.	Please read the following case, and provide a thorough and specific list of differential diagnosis for the underlying cause of this presentation. Please list the diagnosis that most explains all the features of the presentation first, and include rare diagnoses if they are the best explanation for the presentation. "A 41-year-old woman with transient dysarthria and facial droop was transferred to…	1. Infective endocarditis 2. Systemic lupus erythematosus 3. Antiphospholipid syndrome 4. Thrombotic thrombocytopenic purpura 5. Hemolytic-uremic syndrome 6. Disseminated intravascular coagulation 7. Lupus anticoagulant-hypoprothrombinemia syndrome 8. Toxic shock syndrome 9. Septicemia 10. Sickle cell disease or trait-related complications	1	2	10	Systemic Lupus Erythematosus (SLE) Antiphospholipid Syndrome (APS) Thrombotic Thrombocytopenic Purpura (TTP) Disseminated Intravascular Coagulation (DIC) Acute promyelocytic leukemia (APL) Atrial myxoma Libman-Sacks endocarditis Infective endocarditis Thrombophilia Behcet's Disease	1	1	10	1. Infective endocarditis 2. Thrombotic thrombocytopenic purpura/hemolytic uremic syndrome 3. Lupus anticoagulant syndrome 4. Systemic lupus erythematosus 5. Antiphospholipid syndrome 6. Disseminated intravascular coagulation 7. Heparin-induced thrombocytopenia 8. Thrombophilia (factor V Leiden, prothrombin gene mutation) 9. Acute disseminated encephalomyelitis 10. Multiple sclerosis 11. Cerebral…	1	4	16	Libman-Sacks endocarditis Antiphospholipid syndrome Lupus erythematosus Infective endocarditis Thrombotic thrombocytopenic purpura Disseminated intravascular coagulation Systemic vasculitis Hemolytic uremic syndrome Systemic embolism Thromboembolism Hypercoagulable state Cancer-associated thrombosis Atrial myxoma Hemorrhagic ovarian cyst Sickle cell disease Acute intermittent porphyria Coagulopat…	1	2	17	Based on the provided case, here is a list of differential diagnoses for the underlying cause of this patient's presentation, starting with the most likely explanation: Infective endocarditis: The patient presents with transient dysarthria, facial droop, and echocardiogram findings of vegetations on the mitral valve. This is the most likely diagnosis that explains the combination of symptoms and …	1	2	6	Based on the presented case, the following is a list of differential diagnoses for the underlying cause of the patient's presentation, starting with the most likely diagnosis: Infective endocarditis: The presence of multiple echodensities on the mitral valve leaflets, consistent with vegetations, along with mitral regurgitation and transient neurological symptoms, suggests a high likelihood of in…	1	3	6	1. Infective endocarditis: The presence of mitral valve masses, heavy vaginal bleeding, and dyspnea all point to the possibility of infectious endocarditis. Additionally, vegetations seen on the transesophageal echocardiogram support this diagnosis. 2. Libman-Sacks endocarditis: The patient has a history of pruritic, macular rashes with photosensitivity, Raynaud's phenomenon, and dry eyes, which …	0		10	1. Transient ischemic attack (TIA): The patient's presentation of transient dysarthria, facial droop, and a history of hypertension support this diagnosis. The improvement in symptoms within 45 minutes also fits the TIA presentation. However, there was no evidence of an acute infarction in the CT scans. 2. Libman-Sacks endocarditis: The presence of multiple echodensities on the mitral valve leafl…	1	3	10		5e-05	Systemic lupus erythematosus with antiphospholipid syndrome.	4022	https://www.cdc.gov/lupus/facts/detailed.html
Case 13-2022	A 56-year-old man presented to this hospital in early autumn with a 1-month history of myalgias and fever. Approximately 4 weeks before the current presentation, the patient began to have generalized myalgias and arthralgias, which were worst in the shoulders, proximal arms, and upper back. He had fever with temperatures of up to 38.2¬∞C, along with chills and diaphoresis. He took naproxen, and t…	Differential Diagnosis Dr. Molly L. Paras: I was involved in the care of this patient, and I am aware of the final diagnosis. This 56-year-old man presented with subacute fever, back pain, and complete atrioventricular block. He received empirical treatment with a 3-day course of ceftriaxone for possible Lyme carditis, but his symptoms did not abate and testing for Lyme disease antibodies was neg…	Regional myocarditis due to infection with Listeria monocytogenes.	Please read the following case, and provide a thorough and specific list of differential diagnosis for the underlying cause of this presentation. Please list the diagnosis that most explains all the features of the presentation first, and include rare diagnoses if they are the best explanation for the presentation. "A 56-year-old man presented to this hospital in early autumn with a 1-month histo…	1. Infectious causes: - Endocarditis (primary or secondary) - Malaria - Tuberculosis - Tick-borne infections (e.g. Lyme disease, babesiosis) - Helicobacter pylori infection - Bartonella infection - Brucellosis - Coxiella burnetii infection - Mycoplasma pneumonia - Chlamydia infection - Toxoplasmosis - Viral myocarditis 2. Non-infectious causes: - Sarcoidosis - Systemic lupus erythematosus (SLE) -…	0		17	1. Lyme disease: Tick-borne illness caused by Borrelia burgdorferi, characterized by a fever, myalgias, and arthralgias that can progress to cardiac and neurologic symptoms. Lyme disease can be diagnosed using serologic testing, and early treatment with antibiotics is crucial to prevent complications. 2. Influenza: A viral illness that presents with fever, myalgias, and respiratory symptoms. Infl…	0		10	1. Infective endocarditis 2. Cardiac abscess 3. Myocarditis 4. Lyme disease 5. Brucellosis 6. Tuberculosis 7. Sarcoidosis 8. Systemic lupus erythematosus 9. Whipple disease 10. Syphilis 11. Q fever 12. Chlamydia infection 13. Bartonella infection 14. Rickettsial infection 15. HIV infection 16. Mycoplasma infection 17. Toxoplasmosis 18. Babesiosis 19. Malaria 20. Schistosomiasis 21. Tick-borne ill…	0		26	Lyme disease Babesiosis Ehrlichiosis or anaplasmosis Rocky Mountain spotted fever Q fever Typhoid fever Leptospirosis Infective endocarditis Systemic lupus erythematosus (SLE) Polymyalgia rheumatica (PMR) Inflammatory myopathies (dermatomyositis, polymyositis) Hypothyroidism Sarcoidosis Malignancy (lymphoma, myeloma) Paraneoplastic syndrome Chronic fatigue syndrome Fibromyalgia	0		17	Based on the case presentation, here is a list of differential diagnoses for the underlying cause, with the most likely diagnosis explaining all features listed first: Lyme carditis: Given the patient's history of hiking, camping, and swimming in wooded areas and possible exposure to ticks, Lyme carditis should be considered. Although the patient reported no known tick bites, Lyme disease can pre…	0		14	The following is a list of differential diagnoses for the patient's presentation, ordered from the most likely to the rarest: Infective endocarditis: Although the TTE and TEE did not reveal valvular vegetations or aortic root abscess, the presence of fever, bradycardia, and elevated C-reactive protein levels, combined with the patient's complex medical history, warrant consideration of this diagn…	0		10	1. Infective endocarditis: This diagnosis best fits the presentation of fever, myalgias, dyspnea, diaphoresis, and bradycardia with atrioventricular block. The patient has multiple risk factors, including chronic hepatitis B infection, latent tuberculosis, and a history of dental procedures. However, transthoracic and transesophageal echocardiography did not show valvular vegetations or abscess. …	0		11	1. Infective endocarditis 2. Lyme disease 3. Rickettsial disease (e.g., Rocky Mountain spotted fever) 4. Ehrlichiosis/anaplasmosis 5. Babesiosis 6. Bartonella infection (cat scratch disease) 7. Syphilitic endocarditis 8. Mycobacterium tuberculosis infection 9. Tropheryma whipplei infection (Whipple's disease) 10. Coxiella burnetii infection (Q fever) 11. Brucellosis 12. Chlamydial infection (e.g.…	0		23		5e-05	Regional myocarditis due to infection with Listeria monocytogenes.	5	https://www.cdc.gov/listeria/surveillance/annual-summary-2019.html https://www.ncbi.nlm.nih.gov/pmc/articles/PMC5405885/ - 8% of listeria infections
Case 14-2022	A 57-year-old man was evaluated in the gastroenterology clinic of this hospital because of new ascites. Twenty years before the current presentation, the patient began to have swelling of the legs, which initially occurred only after airplane trips. During the fifth decade of life, the leg swelling was present on a daily basis. Thirteen years before the current presentation, the patient began to …	Differential Diagnosis Dr. Michael Dougan: I was involved in the care of this patient, and I am aware of the final diagnosis. This 57-year-old man with a previous diagnosis of eosinophilic gastroenteritis presented with a relatively new onset of rapidly accumulating chylous ascites. He had signs of muscle wasting and reported increasing difficulty with performing activities of daily living. In de…	High-grade B-cell lymphoma, not otherwise specified.	Please read the following case, and provide a thorough and specific list of differential diagnosis for the underlying cause of this presentation. Please list the diagnosis that most explains all the features of the presentation first, and include rare diagnoses if they are the best explanation for the presentation. "A 57-year-old man was evaluated in the gastroenterology clinic of this hospital b…	1. Lymphoma: the diffuse small-bowel wall thickening, enlarged nodes, and pulmonary nodules can be indicative of lymphoma, especially given the patient's history of hypogammaglobulinemia, and the milky-appearing ascitic fluid can be indicative of chylous ascites, which can be seen in lymphoma. 2. Carcinoid syndrome: the frequent bowel movements, flushing, and elevated serotonin levels in the urin…	1	1	12	Malignancy: Gastrointestinal malignancies, such as lymphoma, adenocarcinoma, and sarcoma, can cause protein-losing enteropathy and ascites. Pulmonary malignancies can metastasize to the peritoneum and cause ascites. Heart failure: Right-sided heart failure can cause ascites and leg edema. Liver disease: Cirrhosis and hepatitis can cause ascites, leg edema, and protein-losing enteropathy. Nephroti…	1	1	10	Differential Diagnosis: 1. Lymphoma 2. Tuberculosis 3. Whipple's disease 4. Gaucher's disease 5. Sarcoidosis 6. Systemic mastocytosis 7. Amyloidosis 8. Budd-Chiari Syndrome 9. Portal vein thrombosis 10. Hepatocellular carcinoma 11. Cholangiocarcinoma 12. Metastatic carcinoma 13. Pancreatic adenocarcinoma 14. Mesothelioma 15. Idiopathic portal hypertension (Banti's syndrome) 16. Caroli's disease 1…	1	1	20	Lymphoma: Lymphoma can cause lymph node enlargement, ascites, and pulmonary nodules. It can also cause protein-losing enteropathy, which can lead to leg edema and hypoproteinemia. The presence of enlarged lymph nodes, pulmonary nodules, and milky-appearing ascitic fluid in the upper abdomen can be suggestive of lymphoma. Myeloma: Multiple myeloma can cause hypoproteinemia and protein-losing enter…	1	1	10	Based on the case presentation, the following differential diagnoses should be considered: Lymphatic obstruction or lymphangiectasia: This diagnosis is supported by the longstanding leg edema, protein-losing enteropathy, low serum protein and albumin levels, elevated alpha1-antitrypsin, hypogammaglobulinemia, milky-appearing ascitic fluid, and diffuse small bowel wall thickening on CT enterograph…	1	2	5	Lymphangiectasia (primary or secondary) - The patient's chronic history of leg swelling, protein-losing enteropathy, hypoalbuminemia, hypogammaglobulinemia, and milky ascitic fluid points towards lymphangiectasia as a possible diagnosis. The presence of pulmonary nodules and lymphadenopathy may suggest secondary involvement due to a neoplastic or infectious process. Whipple's disease - The patien…	1	6	7	1. Protein-losing enteropathy: The patient's history of persistent leg edema, low blood protein and albumin levels, and diffuse small bowel thickening on CT scan are suggestive of this diagnosis. However, the lack of improvement after treatment with prednisone and budesonide makes this less likely. 2. Lymphatic obstruction: The presence of milky-appearing ascitic fluid and diffuse small-bowel wal…	1	9	9	1. Protein-losing enteropathy: This diagnosis is consistent with the patient's history of swelling in the legs, low blood protein and albumin levels, and diffuse small-bowel wall thickening. However, it does not fully explain the presence of pulmonary nodules, liver lesions, and lymphadenopathy. 2. Inflammatory bowel disease (IBD): The patient's gastrointestinal symptoms, low IgG, IgA, and IgM le…	1	3	9		5e-05	High-grade B-cell lymphoma	3020	https://onlinelibrary.wiley.com/doi/10.1111/joim.13629
Case 15-2022	A 57-year-old man was evaluated at this hospital because of persistent cough and pulmonary opacities. Six years before the current admission, the patient received a diagnosis of polyarteritis nodosa after fevers, arthralgias, abdominal pain, and testicular pain had developed. He was treated with six cycles of cyclophosphamide, followed by maintenance therapy with prednisone and weekly methotrexat…	Differential Diagnosis Dr. Rachel S. Knipe: This 57-year-old immunosuppressed man with polyarteritis nodosa presents with a waxing and waning pneumonia syndrome that is characterized by centrilobular nodules and tree-in-bud nodularity on chest imaging. Polyarteritis nodosa is a medium-vessel vasculitis that can affect the kidneys, skin, nerves, muscles, and gastrointestinal tract but notably does…	Aspiration pneumonia.	Please read the following case, and provide a thorough and specific list of differential diagnosis for the underlying cause of this presentation. Please list the diagnosis that most explains all the features of the presentation first, and include rare diagnoses if they are the best explanation for the presentation. "A 57-year-old man was evaluated at this hospital because of persistent cough and …	1. Atypical pulmonary infection such as nocardiosis, aspergillosis, mycobacterial infection, fungal infection, or viral infection 2. Relapsing polyarteritis nodosa with pulmonary involvement 3. Drug-induced lung disease 4. Chronic obstructive pulmonary disease exacerbation 5. Bronchiectasis 6. GERD-associated lung disease 7. Connective tissue disease-associated interstitial lung disease 8. Lympho…	0		14	1. Infection: A bacterial, viral, or fungal infection may be responsible for the persistent cough and pulmonary opacities. The history of fever and cough, as well as the presence of patchy opacities in the chest radiographs, support this diagnosis. Pneumonia, tuberculosis, aspergillosis, histoplasmosis, blastomycosis, and coccidioidomycosis are potential infectious causes that need to be ruled ou…	0		18	1. Pulmonary infection (bacterial, fungal, viral) 2. Pulmonary vasculitis (recurrent polyarteritis nodosa) 3. Drug-induced pulmonary disease (from cyclophosphamide, methotrexate, prednisone, oxycodone, inhaled fluticasone-salmeterol, albuterol) 4. Pneumoconiosis (from previous exposure to solvents, fuels, sulfur compounds) 5. Interstitial lung disease (idiopathic pulmonary fibrosis, hypersensitiv…	0		17	Relapse or refractory polyarteritis nodosa Granulomatosis with polyangiitis (Wegener's) Hypersensitivity pneumonitis Non-tuberculous mycobacterial infection Cryptogenic organizing pneumonia (COP) Pulmonary vasculitis Lymphoma Sarcoidosis Pulmonary embolism Lung cancer Drug-induced lung injury Connective tissue disease-associated interstitial lung disease (ILD) Idiopathic pulmonary fibrosis (IPF) …	1	18	18	Based on the provided case, the following differential diagnoses are considered: Invasive pulmonary aspergillosis: The patient's positive galactomannan test result, persistent cough, pulmonary opacities on imaging, immunosuppressive medication history, and partial but incomplete response to antibiotics suggest a possible fungal infection like invasive aspergillosis. Bacterial pneumonia: The patie…	0		8	Based on the case presentation, the following differential diagnoses are listed in order of likelihood: Invasive pulmonary aspergillosis: The patient's positive galactomannan test, along with persistent cough, fever, and pulmonary opacities on imaging, suggest this diagnosis. The patient is also immunosuppressed due to long-term use of prednisone and methotrexate, which increases the risk of oppo…	0		8	1. Invasive pulmonary aspergillosis: The positive galactomannan test result and the clinical presentation of persistent cough, fever, and pulmonary opacities in a patient with immunosuppressive therapy for polyarteritis nodosa point toward this diagnosis. 2. Chronic obstructive pulmonary disease (COPD) exacerbation: The history of smoking, emphysema, bronchial wall thickening, mucus plugging, and…	0		7	1. Invasive pulmonary aspergillosis: The positive galactomannan test, recurrent fever, productive cough, and diffuse reticulonodular opacities on imaging support this diagnosis. Also, the patient's history of immunosuppressive therapy (prednisone, methotrexate, and cyclophosphamide) predisposes him to opportunistic infections like aspergillosis. 2. Chronic pulmonary bacterial infection: The recur…	0		7		0.001	Aspiration pneumonia	12670	https://www.ncbi.nlm.nih.gov/books/NBK430749/ - CAP incidence 1/100 https://www.ncbi.nlm.nih.gov/books/NBK470459/ - aspiration PNA incidence 1/10 CAP
Case 16-2022	A 55-year-old man was transferred to this hospital for evaluation of a mediastinal mass that was identified as part of an evaluation for waxing and waning fevers, night sweats, and fatigue. The patient had been well until 3 months before admission to this hospital, when fatigue and a transient pruritic maculopapular rash on the forearm developed. During the next 6 weeks, the forearm rash resolved…	Differential Diagnosis Dr. David C. Fajgenbaum: This previously healthy 55-year-old man presented with an anterior mediastinal mass, mediastinal lymphadenopathy with low FDG uptake, prominent mesenteric lymph nodes, and splenomegaly in the presence of constitutional symptoms, anasarca, elevated levels of inflammatory markers, renal dysfunction, hypoalbuminemia, anemia, and thrombocytopenia. His i…	Idiopathic multicentric Castleman's disease	Please read the following case, and provide a thorough and specific list of differential diagnosis for the underlying cause of this presentation. Please list the diagnosis that most explains all the features of the presentation first, and include rare diagnoses if they are the best explanation for the presentation. "A 55-year-old man was transferred to this hospital for evaluation of a mediastina…	Possible differential diagnoses for this presentation include: 1. Lymphoma: The enlarged lymph nodes and mediastinal mass could be indicative of lymphoma, which could also explain the fatigue, night sweats, and weight loss. However, the lack of abnormal cells on flow cytometry and the absence of lymphoma on pathological examination of the biopsy specimens make this diagnosis less likely. 2. Infec…	0		10	Lymphoma: Hodgkin or non-Hodgkin lymphoma can present with mediastinal mass and constitutional symptoms like fever, night sweats, and weight loss. Metastatic Cancer: The mediastinum is a common site for metastasis from lung, breast, or other cancers. Constitutional symptoms can occur with metastatic cancer. Tuberculosis: Tuberculosis can present with a mediastinal mass and constitutional symptoms…	1	7	10	1. Lymphoma (both Hodgkin's and non-Hodgkin's) 2. Leukemia 3. Tuberculosis 4. Sarcoidosis 5. Connective tissue diseases (e.g. lupus, rheumatoid arthritis) 6. Other infections (e.g. endocarditis, histoplasmosis) 7. Amyloidosis 8. Metastatic cancer 9. Wegener's granulomatosis 10. Langerhans cell histiocytosis 11. Castleman disease 12. Myasthenia gravis 13. Paraneoplastic syndrome 14. Silicosis 15. …	1	12	17	Hodgkin's lymphoma: Hodgkin's lymphoma is a malignant neoplasm of the lymphoid tissue that can present with a mediastinal mass, night sweats, and fatigue. Non-Hodgkin's lymphoma: Non-Hodgkin's lymphoma is another type of lymphoid neoplasm that can present with a mediastinal mass, night sweats, and fatigue. Tuberculosis: Tuberculosis can present with fever, night sweats, fatigue, and a mediastinal…	1	13	15	Differential diagnosis for the underlying cause of this presentation, listed in order of likelihood: Lymphoma (Hodgkin's or non-Hodgkin's): The patient's presentation includes mediastinal mass, enlarged lymph nodes, night sweats, fevers, and fatigue. Although initial biopsy and flow cytometry did not show immunophenotypic evidence of lymphoma, it could be a false negative or sampling error. Atypi…	0		11	Based on the presentation, here is a list of differential diagnoses for the underlying cause, starting with the most likely explanation: Lymphoma (e.g., Hodgkin's or non-Hodgkin's lymphoma): The patient's symptoms of waxing and waning fevers, night sweats, fatigue, mediastinal mass, and enlarged lymph nodes are highly suggestive of lymphoma. The negative flow cytometry result does not completely …	1	10	13	1. Mediastinal lymphoma: The anterior mediastinal mass, enlarged lymph nodes, persistent fatigue, night sweats, and fevers are highly suggestive of a lymphoproliferative disorder. However, the biopsy of the mediastinal mass did not show any malignancy, making this diagnosis less likely. 2. Sarcoidosis: The anterior mediastinal mass, enlarged lymph nodes, multiple systemic symptoms (night sweats, …	1	3	8	1. Lymphoma (Hodgkin's or non-Hodgkin's): the mediastinal mass, enlarged lymph nodes, night sweats, persistent fatigue, and fever could be indicative of lymphoma. Negative immunophenotypic results reduce the likelihood but cannot completely rule it out. 2. Sarcoidosis: presence of a mediastinal mass, enlarged lymph nodes, fatigue, night sweats, pulmonary edema, and fever also suggest sarcoidosis,…	1	4	11		5e-06	Multicentric Castleman's disease	1156	https://www.ncbi.nlm.nih.gov/books/NBK576394/
Case 17-2022	A 17-year-old boy was admitted to the pediatric intensive care unit (ICU) of this hospital, before the coronavirus disease 2019 (Covid-19) pandemic, because of chest pain, syncope, electrocardiographic (ECG) abnormalities, and elevated blood levels of creatine kinase and troponin T. The patient had been well until 5 days before this admission, when fever, nausea, diarrhea, muscle aches, and chest…	Differential Diagnosis Dr. Puneeta Arya: This 17-year-old boy was admitted to this hospital twice within 9.5 months because of chest pain. The first episode of chest pain was accompanied by syncope, although the associated prodrome, the rapid resolution without intervention, and the absence of palpitations provide reassurance that the syncope did not have a cardiac cause. To construct a different…	Undifferentiated autoimmune rheumatic disease.	Please read the following case, and provide a thorough and specific list of differential diagnosis for the underlying cause of this presentation. Please list the diagnosis that most explains all the features of the presentation first, and include rare diagnoses if they are the best explanation for the presentation. "A 17-year-old boy was admitted to the pediatric intensive care unit (ICU) of this…		0		20	Differential Diagnosis for the Underlying Cause of the Presentation: Acute myocarditis Acute coronary syndrome (ACS) Pulmonary embolism Aortic dissection Takotsubo cardiomyopathy Systemic Lupus Erythematosus (SLE) with cardiac involvement Anorexia nervosa with refeeding syndrome Cocaine-induced myocardial infarction Hypertrophic cardiomyopathy (HCM) Dilated cardiomyopathy (DCM) Of these different…	0		10	1. Pheochromocytoma/Paraganglioma 2. Takotsubo cardiomyopathy 3. Anorexia nervosa with refeeding syndrome 4. Myocarditis 5. Dilated cardiomyopathy 6. Thyroid storm 7. Acute intermittent porphyria 8. Systemic lupus erythematosus (SLE) with pericarditis/myocarditis 9. Sepsis-induced cardiomyopathy 10. Viral illness with myopericarditis	0		10	Acute coronary syndrome: given the presence of chest pain, syncope, ECG abnormalities, and elevated cardiac biomarkers, acute coronary syndrome is a possible diagnosis that needs to be ruled out. Myocarditis: the viral prodrome and ECG findings of ST-segment elevation and PR-segment depression, with normal left ventricular volume and systolic function, suggest myocarditis as a possible diagnosis.…	0		15	Based on the clinical presentation and laboratory findings, the following differential diagnoses should be considered: Myocarditis: The patient's symptoms of chest pain, fever, muscle aches, elevated troponin T, and creatine kinase levels, along with ECG abnormalities (ST-segment elevation and PR-segment depression), could suggest myocarditis, which is inflammation of the heart muscle. This condi…	0		10	Myocarditis: The patient's presentation of fever, chest pain, elevated troponin T and creatine kinase, and ECG abnormalities (ST-segment elevation and PR-segment depression) are consistent with myocarditis, which could be due to a viral infection or an autoimmune etiology. Acute pericarditis: The pleuritic chest pain and ECG abnormalities, particularly ST-segment elevation and PR-segment depressi…	0		10	1. Myocarditis: The patient's symptoms of fever, nausea, diarrhea, muscle aches, chest pain, and elevated troponin T and creatine kinase levels suggest myocardial inflammation possibly due to a viral infection. 2. Pericarditis: Pleuritic left parasternal chest pain with radiation to the left shoulder, worsening on deep breaths and lying flat, may indicate inflammation of the pericardium. However,…	0		8	1. Myocarditis (due to viral or autoimmune causes) 2. Acute pericarditis 3. Stress-induced cardiomyopathy (Takotsubo cardiomyopathy) 4. Acute coronary syndrome (unlikely given the patient's age and lack of risk factors) 5. Pulmonary embolism 6. Systemic lupus erythematosus (SLE) 7. Hypertrophic cardiomyopathy 8. Connective tissue disease (e.g., scleroderma, mixed connective tissue disease) 9. Lym…	0		15		0.0001	Undifferentiated autoimmune rheumatic disease.	163	https://www.ncbi.nlm.nih.gov/pmc/articles/PMC10350301/
Case 18-2022	A 29-year-old woman was admitted to this hospital because of recurrent bone fractures and hypophosphatemia. The patient had been well until 19 months before admission, when pain in the right midfoot developed during a vacation in Europe. On her return to the United States, she was evaluated by her primary care physician at a clinic affiliated with another hospital; an orthotic device was recommen…	Differential Diagnosis Dr. Michael J. Econs: When evaluating a patient with multiple fractures, obtaining a thorough history is critical. First, if the history provided by the patient regarding the cause of the fractures does not seem to make sense, physical abuse must be considered. Second, if the patient has had a lifelong history of fractures, or the fractures occur with low levels of trauma, …	Phosphaturic mesenchymal tumor causing osteomalacia.	Please read the following case, and provide a thorough and specific list of differential diagnosis for the underlying cause of this presentation. Please list the diagnosis that most explains all the features of the presentation first, and include rare diagnoses if they are the best explanation for the presentation. "A 29-year-old woman was admitted to this hospital because of recurrent bone fract…	1. Osteogenesis imperfecta 2. Hypophosphatasia 3. Paget's disease of bone 4. Multiple myeloma 5. Hyperparathyroidism 6. Chronic kidney disease 7. Vitamin D deficiency 8. Anorexia nervosa 9. Rheumatoid arthritis 10. Lupus 11. Sarcoidosis 12. Psoriatic arthritis 13. Gout 14. Osteoarthritis 15. Avascular necrosis 16. Metabolic bone disease.	0		16	Osteomalacia (most likely): Osteomalacia is the most likely diagnosis given the patient's history of recurrent fractures, hypophosphatemia, and bone pain, which is worse when the patient stands upright or walks. Osteomalacia is a metabolic bone disorder characterized by defective mineralization of bone due to vitamin D deficiency, which can result from a variety of causes including inadequate sun…	1	10	10	1. Osteogenesis imperfecta 2. Vitamin D deficiency/osteomalacia 3. Hyperparathyroidism 4. Hypophosphatasia 5. Paget's disease 6. Multiple myeloma 7. Metabolic bone disease associated with obesity 8. Mastocytosis 9. Rickets 10. Renal osteodystrophy 11. Bone metastasis from an underlying malignancy.	0		11	Differential Diagnosis: Osteogenesis Imperfecta (OI) Paget's disease of bone Fibrous dysplasia Hyperparathyroidism Osteomalacia Renal osteodystrophy Hypophosphatasia Multiple myeloma Metastatic bone disease Systemic lupus erythematosus (SLE) Rheumatoid arthritis (RA) Ankylosing spondylitis Psoriatic arthritis Sarcoidosis Mucopolysaccharidosis Ehlers-Danlos syndrome (EDS) Explanation: The patient'…	0		16	Based on the case presentation, the following differential diagnoses should be considered: Osteomalacia: The patient has a history of hypophosphatemia, multiple fractures, bone pain, and fatigue, which are all suggestive of osteomalacia. In addition, the patient has normal bone mineral density, which is more consistent with osteomalacia than osteoporosis. Tumor-induced osteomalacia (TIO): This ra…	1	2	9	Osteomalacia: The patient's presentation of recurrent bone fractures, hypophosphatemia, and persistent foot pain despite various treatments, along with normal bone mineral density, raises suspicion for osteomalacia. This condition is characterized by a deficiency in bone mineralization due to inadequate calcium and phosphate levels or problems with vitamin D metabolism. Hypophosphatemic rickets: …	0		10	1. Hypophosphatemic rickets (e.g. X-linked dominant or autosomal dominant forms) 2. Osteomalacia due to acquired causes of hypophosphatemia a. Tumor-induced osteomalacia b. Renal tubular acidosis c. Renal phosphate leak (e.g. Fanconi syndrome) d. Medication-induced (e.g. some anticonvulsants, bisphosphonates) 3. Osteogenesis imperfecta 4. Nutritional rickets (vitamin D deficiency) 5. Hyperparathy…	1	2	15	1. Osteomalacia: Recurrent bone fractures, hypophosphatemia, and normal bone mineral density on dual-energy x-ray absorptiometry suggest a metabolic bone disease such as osteomalacia. The normal calcium and 25-hydroxyvitamin D levels make this less likely, but it still remains a potential explanation for the presentation. 2. Familial hypophosphatemic rickets: This is an inherited form of rickets …	0		8		1e-06	Phosphaturic mesenchymal tumor causing osteomalacia.	260	Case reports only: https://www.ncbi.nlm.nih.gov/pmc/articles/PMC10350301/
Case 19-2022	A 29-year-old woman was evaluated in the gastroenterology clinic of this hospital for the management of a soft-tissue mass in the head of the pancreas. The patient had been well until 7 weeks before this presentation, when progressive pruritus throughout the body developed, along with nausea, bloating, and watery mustard-colored diarrhea. She had eaten sushi for dinner the previous night. She was…	Differential Diagnosis Dr. DuBois: I participated in the care of this patient, and I am aware of the final diagnosis. This 29-year-old woman presented with obstructive jaundice that had resulted from a soft-tissue mass in the head of the pancreas. Multiple attempts at diagnosis by means of fine-needle aspiration were unrevealing. I will begin by reviewing the differential diagnosis of a persisten…	Pancreatic ductal adenocarcinoma.	Please read the following case, and provide a thorough and specific list of differential diagnosis for the underlying cause of this presentation. Please list the diagnosis that most explains all the features of the presentation first, and include rare diagnoses if they are the best explanation for the presentation. "A 29-year-old woman was evaluated in the gastroenterology clinic of this hospital…	Differential Diagnosis: 1. Pancreatic adenocarcinoma: This is the most likely diagnosis given the hypodense mass and obstructive jaundice seen on imaging, as well as the patient's risk factors (such as family history of cancer) and symptoms (persistent pruritus, nausea, diarrhea, and weight loss). 2. Autoimmune pancreatitis: Although this is less likely given the lack of ANA and IgG abnormalities…	1	1	9	Differential Diagnosis: Pancreatic Cancer: This is the most likely diagnosis considering the location of the mass in the head of the pancreas, the presence of dilated pancreatic and biliary ducts, elevated CA 19-9 levels, and the patient's symptoms of pruritus, nausea, right upper abdominal pain, and weight loss. Cholangiocarcinoma: This is a type of cancer that originates in the bile ducts and c…	1	1	8	Differential Diagnoses: 1. Pancreatic adenocarcinoma 2. Choledocholithiasis 3. Cholangiocarcinoma 4. Autoimmune pancreatitis 5. Pancreatic pseudocyst 6. Gallbladder cancer 7. Hepatocellular carcinoma 8. Caroli disease 9. Sclerosing cholangitis 10. Metastatic carcinoma Most likely diagnosis: Pancreatic adenocarcinoma	1	1	10	Differential diagnosis for a soft-tissue mass in the head of the pancreas, with progressive pruritus, nausea, bloating, and watery mustard-colored diarrhea, along with jaundice, discomfort in the right upper quadrant of the abdomen, decreased appetite, and amber-colored urine: Pancreatic cancer: Pancreatic adenocarcinoma is a common cancer that can present with biliary obstruction, causing jaundi…	1	1	10	Differential diagnoses for the underlying cause of this presentation, in order of likelihood: Pancreatic adenocarcinoma: The patient's presentation of a pancreatic head mass, jaundice, elevated CA 19-9, dilated bile ducts, and weight loss strongly suggest pancreatic cancer. Autoimmune pancreatitis: Although there is no evidence of autoimmune pancreatitis from the aspirates, the patient's young ag…	1	1	8	Pancreatic adenocarcinoma: The presence of a mass in the head of the pancreas, elevated CA 19-9 levels, obstructive jaundice, and dilated biliary and pancreatic ducts make this a strong possibility. However, the multiple negative and atypical fine-needle aspiration results and lack of definitive diagnosis make this less certain. Autoimmune pancreatitis: This is a less likely possibility given the…	1	1	9	1. Pancreatic adenocarcinoma: Given the location of the mass in the head of the pancreas, elevated CA 19-9 levels, and the symptoms of jaundice, nausea, bloating, and diarrhea, pancreatic cancer is a strong possibility. However, none of the fine-needle aspiration samples showed definite evidence of cancer. 2. Autoimmune pancreatitis: Although none of the aspirates showed evidence of autoimmune pa…	1	1	6	1. Pancreatic head mass causing biliary obstruction: a. Pancreatic adenocarcinoma (typical demographics, elevated CA 19-9 levels, but no definitive diagnosis on multiple biopsies) b. Autoimmune pancreatitis (normal IgG levels, negative ANA test, and no evidence of autoimmune pancreatitis on aspirates) c. Pancreatic neuroendocrine tumor (rare but may cause similar symptoms and mass) d. Metastatic …	1	1	12		0.0002	Pancreatic ductal adenocarcinoma.	20188	https://seer.cancer.gov/statfacts/html/pancreas.html
Case 2-2022	A 70-year-old man was evaluated in the rheumatology clinic of this hospital because of a recurrent left pleural effusion. Five years before this presentation, the patient had pain in the shoulders and proximal muscles of the arms and legs. The pain was worse in the morning and was associated with fatigue. There was no associated stiffness. The erythrocyte sedimentation rate and the C-reactive pro…	Differential Diagnosis Dr. Peter C. Grayson: This 70-year-old man presented with a recurrent left pleural effusion in the context of a severe, systemic illness that was characterized by musculoskeletal pain, chondritis, recurrent deep-vein thrombosis, scleritis, and elevated levels of acute-phase reactants. His presentation was notable for a series of seemingly unrelated and progressive inflammat…	VEXAS (vacuoles, E1 enzyme, X-linked, autoinflammatory, somatic) syndrome.	Please read the following case, and provide a thorough and specific list of differential diagnosis for the underlying cause of this presentation. Please list the diagnosis that most explains all the features of the presentation first, and include rare diagnoses if they are the best explanation for the presentation. "A 70-year-old man was evaluated in the rheumatology clinic of this hospital becau…	1. Relapsing polychondritis 2. Systemic lupus erythematosus 3. Sjogren's syndrome 4. Rheumatoid arthritis 5. Giant cell arteritis 6. Antiphospholipid syndrome 7. Myelodysplastic syndrome or other hematologic disorder 8. Lymphoma or other neoplastic disorder 9. Behcet's syndrome 10. Vasculitis, including granulomatosis with polyangiitis or microscopic polyangiitis 11. Dermatomyositis or polymyosit…	0		13	1. Relapsing Polychondritis: The inflammatory joint and cartilage symptoms, perichondrial inflammation and degenerative changes in the cartilage, and elevated inflammatory markers suggest relapsing polychondritis. Auricular involvement is common in relapsing polychondritis, and the efficacy of prednisone and methotrexate in managing symptoms is consistent with this diagnosis. 2. Systemic Lupus Er…	0		13	1. Relapsing polychondritis 2. Granulomatosis with polyangiitis (Wegener's) 3. Systemic lupus erythematosus 4. Sjogren's syndrome 5. Rheumatoid arthritis 6. Giant cell arteritis/polymyalgia rheumatica 7. Systemic sclerosis (scleroderma) 8. Behcet's syndrome 9. Myositis 10. Drug-induced lupus 11. Lymphoma 12. Multiple myeloma 13. Non-Hodgkin's lymphoma 14. Amyloidosis 15. Sarcoidosis 16. Castleman…	0		18	Based on the presented case, the following is a list of differential diagnoses: Relapsing Polychondritis (RP) Systemic Lupus Erythematosus (SLE) Granulomatosis with Polyangiitis (GPA) Behcet's Disease Sarcoidosis Rheumatoid Arthritis (RA) Antiphospholipid Syndrome (APS) Polymyalgia Rheumatica (PMR) Inflammatory Bowel Disease (IBD) Hematologic Malignancies (such as lymphoma) Drug-Induced Vasculiti…	0		11	Based on the case presentation, here is a list of differential diagnoses in descending order of likelihood: Relapsing polychondritis: This is the most likely diagnosis considering the recurrent auricular chondritis, scleritis, pleural effusion, elevated ESR and CRP, and the response to prednisone. However, the absence of other cartilaginous involvements (such as nasal chondritis or laryngotrachea…	0		8	Based on the provided clinical history, here is a list of differential diagnoses for the underlying cause of the patient's presentation, starting with the diagnosis that most explains all the features of the presentation: Relapsing polychondritis: This diagnosis best explains the patient's history of recurrent pleural effusion, cartilage and joint inflammation, ear involvement, elevated inflammat…	0		8	1. Relapsing polychondritis - The initial presentation with recurrent left pleural effusion, pain in the shoulders and proximal muscles of the arms and legs, and elevated erythrocyte sedimentation rate and C-reactive protein level suggests an autoimmune process. In addition, the patient's recurrent episodes of cartilage inflammation and the presence of perichondrial inflammation on the biopsy of …	0		8	1. Relapsing polychondritis: The patient's history of recurrent pain and swelling in the ear cartilage, along with biopsy findings of perichondrial inflammation and degenerative changes in the cartilage, supports this diagnosis. Additionally, the recurrent episodes of scleritis and inflammatory joint and cartilage symptoms in response to prednisone tapering may also suggest relapsing polychondrit…	0		8		7.69e-05	VEXAS (vacuoles, E1 enzyme, X-linked, autoinflammatory, somatic) syndrome.	82	https://jamanetwork.com/journals/jama/fullarticle/2800661
Case 2-2023	A 76-year-old man was evaluated in the emergency department of this hospital because of dizziness and altered mental status. On the day of the current evaluation, the patient was observed crawling on a city sidewalk. He appeared pale and diaphoretic. On evaluation by emergency medical services, he reported feeling dizzy and ‚Äúweird.‚Äù A fingerstick blood glucose level was 152 mg per deciliter (…	Differential Diagnosis Dr. Antonio Granfone: This 76-year-old man was initially brought to the hospital because of abnormal behavior. While he was in the emergency department, a progressively decreased level of consciousness was observed, along with disorientation. I will first consider common and ‚Äúcannot miss‚Äù causes of altered mental status; I will then use the findings on physical examinat…	Chronic salicylate toxicity.	Please read the following case, and provide a thorough and specific list of differential diagnosis for the underlying cause of this presentation. Please list the diagnosis that most explains all the features of the presentation first, and include rare diagnoses if they are the best explanation for the presentation. "A 76-year-old man was evaluated in the emergency department of this hospital beca…	1. Metabolic encephalopathy 2. Hypertensive encephalopathy 3. Stroke (ischemic or hemorrhagic) 4. Intracranial mass lesion (such as tumor or abscess) 5. Seizure disorder (including non-convulsive status epilepticus) 6. Infectious encephalitis or meningitis 7. Wernicke's encephalopathy 8. Carbon monoxide poisoning 9. Hypoglycemia 10. Hyperglycemia/hyperosmolar hyperglycemic state 11. Hyponatremia …	0		20	Differential diagnosis for the underlying cause of this presentation: Hypoglycemia: the patient was found to have a fingerstick blood glucose level of 152 mg per deciliter (8.4 mmol per liter) on initial evaluation, which could have caused dizziness and altered mental status. Stroke: though imaging did not reveal evidence of acute intracranial hemorrhage or territorial infarction, nonspecific mil…	0		10	1. Delirium/delirium tremens 2. Seizure disorder 3. Stroke 4. Traumatic brain injury 5. Infection (such as meningitis or encephalitis) 6. Hypertensive encephalopathy 7. Metabolic encephalopathy (such as hepatic encephalopathy or uremic encephalopathy) 8. Wernicke-Korsakoff syndrome 9. Hydrocephalus 10. Brain tumor 11. Medication/toxin overdose or withdrawal (such as benzodiazepine withdrawal) 12.…	0		15	Differential Diagnosis for Dizziness and Altered Mental Status in a 76-Year-Old Man: Hypoglycemia: the patient had a fingerstick glucose of 152 mg/dL, which may indicate hyperglycemia; however, it is important to rule out hypoglycemia as a cause of the patient's symptoms. Stroke: although CT angiography showed no evidence of acute intracranial hemorrhage or territorial infarction, small vessel di…	0		8	Based on the provided case, the following differential diagnoses are considered, listed in order of likelihood: Encephalopathy (metabolic, toxic, or infectious): The patient's altered mental status, agitation, nonsensical speech, and disorientation may be explained by an encephalopathic process. The patient's history of diabetes mellitus, hypertension, and chronic kidney disease may predispose hi…	0		7	Based on the provided case presentation, the following differential diagnoses should be considered, listed in the order of likelihood: Delirium, possibly multifactorial in origin (due to medical conditions, medications, and/or stress) Seizure disorder (with postictal state or nonconvulsive status epilepticus) Infection (e.g., encephalitis, meningitis, sepsis) Acute cerebrovascular event (e.g., tr…	0		14	1. Acute encephalopathy due to metabolic, toxic, or infectious causes 2. Acute stroke (ischemic or hemorrhagic) - ruled out by CT and MRI 3. Seizure disorder exacerbation or postictal state 4. Traumatic brain injury complication or intracranial hemorrhage - ruled out by CT and MRI 5. Wernicke's encephalopathy - possible explanation for confusion, ataxia, and ophthalmoplegia 6. Meningitis or encep…	0		14	1. Metabolic encephalopathy (due to electrolyte disturbances, kidney disease, or medication side effects) 2. Acute stroke or transient ischemic attack (though not supported by CT and MRI findings) 3. Seizure-related changes (despite normal EEG) 4. Intracerebral hemorrhage (ruled out by CT and MRI) 5. Hypoglycemic episode (but initial glucose level was normal) 6. Infection (e.g., meningitis or enc…	0		7		1e-06	Chronic salicylate toxicity.	341	https://www.ncbi.nlm.nih.gov/pmc/articles/PMC7465677/
Case 20-2022	A 25-year-old man with a history of B-cell acute lymphoblastic leukemia was evaluated in the emergency department of this hospital because of vision changes. Ten months before this presentation, the patient was evaluated for fatigue and dyspnea on exertion. Laboratory testing revealed a hemoglobin level of 3.5 g per deciliter (reference range, 13.5 to 17.5) and a white-cell count of 23,450 per mi…	Differential Diagnosis Dr. Zachariah DeFilipp: I participated in the care of this patient, and I am aware of the final diagnosis. This 25-year-old man with a history of B-cell acute lymphoblastic leukemia presented 5 months after allogeneic HCT with vision changes, lymphadenopathy, worsening anemia, thrombocytopenia, and monoclonal protein detected on serum protein electrophoresis. MRI of the hea…	Plasma-cell myeloma post-transplantation lymphoproliferative disorder.	Please read the following case, and provide a thorough and specific list of differential diagnosis for the underlying cause of this presentation. Please list the diagnosis that most explains all the features of the presentation first, and include rare diagnoses if they are the best explanation for the presentation. "A 25-year-old man with a history of B-cell acute lymphoblastic leukemia was evalu…	1. Acute lymphoblastic leukemia relapse with CNS involvement 2. Graft-versus-host disease involving the central nervous system 3. Demyelinating disease (e.g. multiple sclerosis) 4. Infection (e.g. viral encephalitis) 5. Lymphoproliferative disorder (e.g. lymphoma) 6. Cerebral vasculitis 7. Neurosarcoidosis 8. Atherosclerotic disease 9. Thrombotic thrombocytopenic purpura 10. Hemophagocytic lympho…	0		10	Differential Diagnosis for Vision Changes in a Patient with B-cell Acute Lymphoblastic Leukemia: Central retinal vein occlusion (CRVO): A rare complication of leukemia, where the blockage of the central retinal vein causes sudden vision loss, scotomas, and blurred vision. Optic neuropathy: Optic neuropathy can occur due to leukemic infiltration or side effects of chemotherapy, leading to visual l…	0		9	1. CNS GVHD 2. CNS involvement of acute lymphoblastic leukemia 3. CNS lymphoma 4. Infectious process (e.g. viral encephalitis, bacterial meningitis) 5. Demyelinating disorder (e.g. multiple sclerosis) 6. Autoimmune encephalitis 7. Metabolic disturbance (e.g. hyponatremia, hypercalcemia) 8. Vitamin B12 deficiency 9. Paraneoplastic syndrome 10. Cerebral vasculitis	0		10	Differential diagnosis for the underlying cause of this presentation may include: Leukemic infiltration: Recurrence of B-cell acute lymphoblastic leukemia (ALL) with leukemic infiltration into the central nervous system and the eyes, causing vision changes and papular skin rash. Graft-versus-host disease (GVHD): A common complication after allogeneic hematopoietic-cell transplantation (HCT), pres…	0		10	Based on the patient's presentation and history, the following differential diagnoses can be considered, listed in order of likelihood: Central nervous system (CNS) involvement in B-cell acute lymphoblastic leukemia (ALL) relapse: The patient's history of B-cell ALL, recent worsening anemia, and MRI findings suggestive of possible leukemia involvement in the CNS make this the most likely diagnosi…	1	6	6	Based on the provided case, the following differential diagnoses are listed in order of relevance: Central nervous system (CNS) relapse of B-cell acute lymphoblastic leukemia (ALL): The patient has a history of B-cell ALL and is currently presenting with vision changes, MRI findings of multiple new hyperintense lesions in the brain, and abnormal cerebrospinal fluid (CSF) results. CNS relapse of A…	1	6	6	1. Central nervous system graft-versus-host disease (CNS GVHD) 2. Acute lymphoblastic leukemia with CNS involvement 3. Infectious causes: a. Viral encephalitis (e.g., cytomegalovirus, Epstein-Barr virus, varicella-zoster virus, human herpesvirus 8) b. Lyme disease c. Neurosyphilis 4. Demyelinating conditions: a. Multiple sclerosis b. Neuromyelitis optica 5. Posterior reversible encephalopathy syn…	0		10	1. Central nervous system graft-versus-host disease (CNS GVHD) - the patient's history of allogeneic hematopoietic-cell transplantation (HCT) and MRI findings may suggest CNS GVHD. 2. Acute lymphoblastic leukemia with CNS involvement - Given the patient's history of B-cell acute lymphoblastic leukemia, relapse involving the CNS may be a possible explanation for the MRI findings and systemic sympt…	0		9		5e-06	post-transplantation lymphoproliferative disorder	859	approx 5/10000 solid organ recipients USA - https://unos.org/news/2022-organ-transplants-again-set-annual-records/ 1 in 100 solid organ transplant recipients https://www.nature.com/articles/3800080
Case 21-2022	A 17-year-old girl was admitted to this hospital during the coronavirus disease 2019 (Covid-19) pandemic because of fever and cough. The patient had been well until 10 days before admission, when fever and cough that was productive of clear sputum developed. She also had fatigue, eye redness, sore throat, nasal congestion, rhinorrhea, and myalgias. Seven days before this admission, the patient wa…	Differential Diagnosis Dr. Mary C. Ottolini: This previously healthy teenage girl with obesity presented to the emergency department during the Covid-19 pandemic with prolonged fever, cough, fatigue, and other symptoms of upper respiratory infection. Conjunctivitis had occurred and resolved in both eyes, with residual pain in the right eye. Pleuritic pain and dyspnea had developed. The cough, whi…	Granulomatosis with polyangiitis.	Please read the following case, and provide a thorough and specific list of differential diagnosis for the underlying cause of this presentation. Please list the diagnosis that most explains all the features of the presentation first, and include rare diagnoses if they are the best explanation for the presentation. "A 17-year-old girl was admitted to this hospital during the coronavirus disease 2…	1. Pulmonary embolism 2. Pneumonia 3. Tuberculosis 4. Bronchitis 5. Viral infection 6. Vasculitis 7. Interstitial lung disease 8. Hypersensitivity pneumonitis 9. Pulmonary hemorrhage 10. Connective tissue disease-associated lung disease 11. Acute interstitial pneumonia 12. Eosinophilic pneumonia 13. Idiopathic pulmonary fibrosis 14. Goodpasture syndrome 15. Alveolar proteinosis 16. Wegener's gran…	1	16	29	Based on the provided case, the following is a list of differential diagnoses for the underlying cause of this presentation. The diagnosis that most explains all the features of the presentation is pulmonary embolism. Pulmonary embolism Pneumonia COVID-19 Tuberculosis Lung abscess Lung cancer Acute respiratory distress syndrome (ARDS) Sarcoidosis Wegener's granulomatosis Goodpasture's syndrome Id…	1	9	18	Differential Diagnoses: 1. Pulmonary Embolism: - Patients with pulmonary embolism may present with cough, chest pain, dyspnea, and hemoptysis. - Risk factors include female sex, hormonal contraceptives, obesity, immobility, cancer, and recent surgery. - CT chest with contrast is the diagnostic test of choice, and can show a filling defect in the pulmonary arteries. 2. COVID-19 Pneumonia: - Patien…	1	5	9	ossible differential diagnoses for the underlying cause of this presentation include: Pulmonary Embolism: given the presence of chest pain, hemoptysis, shortness of breath, and tachycardia, a pulmonary embolism should be considered. The patient's decreased breath sounds and chest x-ray findings may also support this diagnosis. Pneumonia: with the presence of fever, cough, and chest pain, a bacter…	1	6	6	Based on the provided case presentation, the following differential diagnoses are considered, starting with the diagnosis that most explains all the features of the presentation: Atypical pneumonia (e.g., Mycoplasma pneumoniae or Chlamydophila pneumoniae): Fever, cough, sore throat, myalgias, and conjunctival injection are consistent with atypical pneumonia. The negative SARS-CoV-2 and influenza …	1	6	9	Based on the provided information, the following differential diagnoses are considered in order of likelihood: Atypical pneumonia (e.g., Mycoplasma pneumoniae, Chlamydophila pneumoniae, Legionella pneumophila) - fever, cough, eye redness, sore throat, nasal congestion, and rhinorrhea are common symptoms in these infections, and the negative tests for SARS-CoV-2, influenza A and B, and respiratory…	0		8	1. Pneumonia (bacterial or viral): This diagnosis would best explain the fever, cough, shortness of breath, chest discomfort, and abnormalities seen on chest radiography and CT. Given the negative SARS-CoV-2 and influenza tests, other causes of pneumonia could be considered, such as atypical bacterial pathogens or other viral pathogens. 2. Covid-19: Despite the negative SARS-CoV-2 test, it is sti…	0		9	1. Coronavirus disease 2019 (Covid-19): The patient's presentation of fever, cough, fatigue, sore throat, and shortness of breath are consistent with Covid-19; however, the negative SARS-CoV-2 RNA test and normal interferon-gamma release assay suggest that it may not be the primary cause of her symptoms. 2. Bacterial pneumonia: The chest radiography and CT scan findings, along with the fever, cou…	0		9		1e-05	Granulomatosis with polyangiitis.	9806	https://www.ncbi.nlm.nih.gov/books/NBK557827/
Case 22-2022	A 34-year-old woman was admitted to this hospital with hypercortisolism in the context of a metastatic pancreatic neuroendocrine tumor. The patient had been well until 4 years before this presentation, when abdominal pain, diarrhea, and ascites developed. A pancreatic neuroendocrine tumor with metastases to the liver and spleen was ultimately diagnosed, and treatment with octreotide and everolimu…	Differential Diagnosis Dr. Daniel Restrepo: This 34-year-old woman with a metastatic pancreatic neuroendocrine tumor, complicated by ectopic corticotropin secretion and hypercortisolism, presents with progressive pulmonary findings on cross-sectional imaging. Although she has a complex history and is presenting with large amounts of clinical data, I will first focus on specific features of this p…	Infection with Blastomyces dermatitidis.	Please read the following case, and provide a thorough and specific list of differential diagnosis for the underlying cause of this presentation. Please list the diagnosis that most explains all the features of the presentation first, and include rare diagnoses if they are the best explanation for the presentation. "A 34-year-old woman was admitted to this hospital with hypercortisolism in the co…	1. Metastatic pancreatic neuroendocrine tumor with associated hypercortisolism 2. Cushing's disease from residual pituitary lesion or recurrence 3. Ectopic adrenocorticotropic hormone (ACTH) secretion from metastatic pancreatic neuroendocrine tumor 4. Adrenal adenoma or carcinoma 5. Adrenal hyperplasia 6. Nelson syndrome (if patient had previous pituitary surgery) 7. Primary pigmented nodular adr…	0		15	Differential diagnosis for the underlying cause of this presentation: Pancreatic neuroendocrine tumor (PNET) with metastases to the liver and spleen, which can cause abdominal pain, diarrhea, and ascites, and can produce hormones like cortisol and corticotropin. Cushing's syndrome due to a pituitary adenoma, which can cause weight gain, hyperglycemia, mood changes, elevated cortisol and corticotr…	0		11	1. Metastatic pancreatic neuroendocrine tumor causing hypercortisolism 2. Cushing‚Äôs disease due to corticotropin-secreting pituitary adenoma 3. Ectopic ACTH secretion from small-cell lung cancer 4. Carcinoid tumor with ectopic ACTH secretion 5. Adrenal Cushing‚Äôs syndrome due to bilateral hyperplasia or adenoma 6. Pheochromocytoma or paraganglioma 7. Acute respiratory distress syndrome 8. Aspe…	0		18	Differential diagnosis for this presentation may include: Metastatic pancreatic neuroendocrine tumor with hypercortisolism (Cushing's syndrome): Given the patient's history of a pancreatic neuroendocrine tumor with metastases, elevated cortisol and corticotropin levels, and imaging findings of a pancreatic tail mass and adrenal thickening, this diagnosis is most likely. Ectopic ACTH-producing tum…	0		10	Differential diagnoses for the underlying cause of this presentation, in order of likelihood: Ectopic corticotropin secretion by the metastatic pancreatic neuroendocrine tumor: This diagnosis explains the patient's hypercortisolism in the context of her pancreatic neuroendocrine tumor, as well as her persistent elevated cortisol and corticotropin levels despite pituitary surgeries. Residual pitui…	0		5	Ectopic Cushing's Syndrome secondary to metastatic pancreatic neuroendocrine tumor (PNET): This diagnosis most comprehensively explains the presentation of hypercortisolism, elevated corticotropin levels, and the patient's history of a pancreatic neuroendocrine tumor with metastases to the liver and spleen. Cushing's Disease due to corticotroph adenoma: The presence of a pituitary lesion and elev…	0		12	1. Ectopic Cushing's syndrome due to metastatic pancreatic neuroendocrine tumor: This diagnosis most closely fits the patient's presentation, as the patient had an established history of pancreatic neuroendocrine tumor, and her cortisol and corticotropin levels remained elevated despite pituitary surgeries. 2. Cushing's disease due to a corticotroph adenoma: Although the patient had initial MRI f…	0		8	1. Ectopic Cushing's syndrome due to metastatic pancreatic neuroendocrine tumor: This diagnosis best explains the patient's hypercortisolism, elevated corticotropin levels, and resistance to treatment after pituitary resection, as well as the presence of a pancreatic neuroendocrine tumor with metastases. The pancreas lesion and liver and spleen metastases seen on imaging support the diagnosis as …	0		12		1e-06	Infection with Blastomyces dermatitidis.	1342	https://www.ncbi.nlm.nih.gov/books/NBK441987/
Case 23-2022	A 49-year-old man was admitted to this hospital because of hypoglycemia. The patient had been well until 3 hours before this admission, when altered mental status developed while he was at work. During a meeting, his colleagues noticed that he was not paying attention or participating in the conversation, which was atypical of the patient. Instead, he was fidgeting and mumbling as though talking …	Differential Diagnosis Dr. Amy W. Baughman: This 49-year-old man presented with recurrent symptomatic hypoglycemia. He reported that he had gained weight recently, that he was eating five meals a day, and that he had intermittent morning dizziness that resolved with food. His medical history included Bell‚Äôs palsy and hypoglycemia that had not been evaluated previously. His social history was no…	Well-differeniated pancreatic insulin-secreting neuroendocrine tumor (insulinoma).	Please read the following case, and provide a thorough and specific list of differential diagnosis for the underlying cause of this presentation. Please list the diagnosis that most explains all the features of the presentation first, and include rare diagnoses if they are the best explanation for the presentation. "A 49-year-old man was admitted to this hospital because of hypoglycemia. The pati…	1. Insulinoma 2. Factitious hypoglycemia 3. Adrenal insufficiency 4. Hypopituitarism 5. Liver disease (severe) 6. End-stage renal disease (including insulin resistance associated with uremia) 7. Alcoholism (acute) 8. Medication/toxic exposure (e.g., beta blockers, amiodarone, quinine, sulfonylureas) 9. Malignancy (e.g., hepatocellular carcinoma with hypoglycemia, paraneoplastic syndrome)	1	1	12	Differential diagnosis for hypoglycemia and altered mental status: Insulinoma: Insulin-secreting tumors of pancreatic beta cells that cause hypoglycemia, with altered mental status, confusion, seizures, and coma. Hypoglycemia due to medications: Certain medications, such as insulin, sulfonylureas, and meglitinides can cause hypoglycemia, especially if doses are too high or taken without food. Adr…	1	1	11	1. Insulinoma 2. Adrenal insufficiency 3. Hypopituitarism 4. Liver disease 5. Renal failure 6. Autoimmune hypoglycemia 7. Factitious hypoglycemia 8. Medication induced hypoglycemia (from a non-diabetic medication) 9. Reactive hypoglycemia 10. Infection (such as sepsis or tuberculosis) 11. Paraneoplastic syndrome 12. Iatrogenic (from too much insulin or other hypoglycemic agent) 13. Idiopathic hyp…	1	1	16	Differential Diagnosis for the underlying cause of hypoglycemia in this presentation: Insulinoma - a pancreatic neuroendocrine tumor that produces excessive insulin and causes hypoglycemia. The intermittent morning dizziness and weight gain can be explained by postprandial hypoglycemia. Non-insulinoma pancreatogenous hypoglycemia syndrome (NIPHS) - a rare condition in which hypoglycemia is caused…	1	1	10	Based on the presentation, the following differential diagnoses can be considered: Insulinoma: This is a rare neuroendocrine tumor that secretes excess insulin, causing hypoglycemia. The patient's recurrent hypoglycemic episodes, altered mental status, improvement after the administration of dextrose, and the lack of other identifiable causes make this a strong possibility. Non-insulinoma pancrea…	1	1	7	Insulinoma: A pancreatic tumor that produces excessive amounts of insulin, leading to hypoglycemia. The patient's history of recurrent hypoglycemia, weight gain, and improvement in mental status after dextrose administration makes this a likely diagnosis. Factitious hypoglycemia: Deliberate administration of insulin or oral hypoglycemic agents to cause low blood sugar. The patient is a registered…	1	1	7	1. Insulinoma: A pancreatic tumor causing excessive insulin secretion, leading to hypoglycemia, weight gain, and altered mental status. 2. Reactive hypoglycemia: Hypoglycemia occurring in response to a meal, possibly due to inappropriate insulin secretion or sensitivity. Fits the presentation of hypoglycemia and history of improvement after eating. 3. Adrenal insufficiency: Can cause hypoglycemia…	1	1	9	1. Hypoglycemia due to insulinoma: This diagnosis is most likely as the patient presents with symptoms of hypoglycemia, including altered mental status, which resolve on the administration of dextrose. The patient also reports unintentional weight gain and morning dizziness, which resolve after eating. 2. Reactive hypoglycemia: This condition could explain the patient's intermittent morning dizzi…	1	1	6		4e-06	Insulinoma	8440	https://www.ncbi.nlm.nih.gov/books/NBK544299/
Case 24-2022	A 31-year-old man was admitted to this hospital because of perianal and penile ulcers, rectal pain, and vesiculopustular rash. The patient had been in his usual state of health until 9 days before this admission, when he noticed several itchy white ‚Äúbumps‚Äù around the anus that subsequently evolved into ulcerative lesions. The next day, he sought evaluation at a primary care clinic of another …	Differential Diagnosis Dr. Nesli Basgoz: I was involved in the care of this patient, and I am aware of the final diagnosis. This 31-year-old man was admitted to the hospital with an illness that began with rash, with anogenital and cutaneous lesions, followed by regional lymphadenopathy, systemic symptoms, and progression of disseminated papulovesicular and papulopustular skin lesions. On the bas…	Infection with monkeypox virus, West African clade.	Please read the following case, and provide a thorough and specific list of differential diagnosis for the underlying cause of this presentation. Please list the diagnosis that most explains all the features of the presentation first, and include rare diagnoses if they are the best explanation for the presentation. "A 31-year-old man was admitted to this hospital because of perianal and penile ul…	Differential Diagnosis: 1. Secondary Syphilis: The patient has a history of secondary syphilis, and the current perianal, penile ulcers, and vesiculopustular rash are consistent with syphilis. The treponemal antibody test was positive, and the RPR test was reactive at a dilution of 1:1. 2. Herpes Simplex Virus (HSV) Infection: The patient has a history of recurrent oral herpes simplex virus (HSV)…	1		11	Differential diagnosis for the underlying cause of this presentation: Genital herpes simplex virus (HSV) infection Herpes simplex virus proctitis Syphilis Lymphogranuloma venereum (LGV) Granuloma inguinale Chancroid Behcet's disease Crohn's disease Inflammatory bowel disease Bacterial infections, including streptococcal or staphylococcal infections, chlamydia, gonorrhea, and Mycobacterium ulceran…	0		20	1. Lymphogranuloma venereum (LGV) 2. Herpes simplex virus (HSV) proctitis 3. Granuloma inguinale (donovanosis) 4. Beh√ßet's disease 5. Syphilis 6. Chancroid (Haemophilus ducreyi) 7. Crohn's disease 8. Inflammatory bowel disease (IBD) 9. Fournier's gangrene 10. Ecthyma gangrenosum The most likely diagnosis based on the presentation is lymphogranuloma venereum (LGV), which is a sexually transmitted…	0		10	Based on the information provided, the following is a list of differential diagnoses for the underlying cause of the patient's presentation: Genital herpes: The presentation is consistent with genital herpes infection, which can cause vesiculopustular rash, perianal and penile ulcers, and painful proctitis. Lymphogranuloma venereum (LGV): LGV is a sexually transmitted disease caused by Chlamydia …	0		9	Herpes Simplex Virus (HSV) infection: The patient's perianal ulcers and penile ulcer, as well as the history of recurrent oral HSV infection, make this an important consideration. However, the negative HSV PCR test from skin lesions and blood, as well as the lack of improvement with valacyclovir, challenge this diagnosis. Syphilis: The patient's history of secondary syphilis, positive treponemal …	0		9	Genital herpes (Herpes Simplex Virus 2, HSV-2): This diagnosis is most consistent with the patient's presentation of perianal and penile ulcers, rectal pain, and vesiculopustular rash. The patient also has a history of recurrent oral HSV infection, which increases the likelihood of genital herpes. However, the patient's ulcers and proctitis did not improve with valacyclovir treatment, and subsequ…	0		7	1. Herpes simplex virus (HSV) infection 2. Syphilis 3. Gonorrhea 4. Chlamydia trachomatis infection 5. Acyclovir-resistant HSV infection 6. Multidrug-resistant gonorrhea 7. Varicella-zoster virus (VZV) infection 8. Lymphogranuloma venereum (LGV) 9. Granuloma inguinale (donovanosis) 10. BehÃ§et's disease 11. Pyoderma gangrenosum 12. Ano-rectal Crohn's disease 13. Haemophilus ducreyi infection (cha…	0		13	1. Herpes simplex virus (HSV) infection: This is a possible explanation for the perianal and penile ulcers, as well as the vesiculopustular rash. The patient has a history of recurrent oral HSV infection. 2. Syphilis: The positive treponemal antibody test and history of secondary syphilis could suggest a re-infection or an atypical presentation. However, the patient was treated with penicillin G …	0		9		1e-05	Infection with monkeypox virus, West African clade.	46	https://www.cdc.gov/poxvirus/mpox/cases-data/technical-report/report-4.html
Case 25-2022	A 25-year-old woman with a history of migraines was admitted to this hospital with progressively worsening headaches and photophobia during the previous 6 weeks and a 1-week history of nausea, vomiting, and blurred vision. Six weeks before this admission, the patient began to have headaches that were not characteristic of her previous migraines. She described these headaches as discomfort in the …	Differential Diagnosis Dr. Christina M. Marra: This 25-year-old woman presented with a 6-week history of headache and photophobia and more recent nausea, vomiting, and double vision. Imaging studies showed hydrocephalus and basilar leptomeningeal enhancement, and neurologic examination revealed a left sixth-nerve palsy. Analysis of a CSF sample obtained from a lumbar puncture that had been perfor…	Chronic Candida albicans meningitis.	Please read the following case, and provide a thorough and specific list of differential diagnosis for the underlying cause of this presentation. Please list the diagnosis that most explains all the features of the presentation first, and include rare diagnoses if they are the best explanation for the presentation. "A 25-year-old woman with a history of migraines was admitted to this hospital wit…	1. Meningioma 2. Lymphoma 3. Metastatic tumor 4. Neurosarcoidosis 5. Neurotuberculosis 6. Neurosyphilis 7. Cryptococcal meningitis 8. Toxoplasmosis 9. Coccidioidomycosis 10. Histoplasmosis 11. Listeriosis 12. Wegener's granulomatosis 13. Vasculitis 14. Beh√ßet's disease 15. Multiple sclerosis 16. Neuromyelitis optica 17. Acute disseminated encephalomyelitis 18. Idiopathic intracranial hypertensio…	0		21	Differential diagnosis for the underlying cause of the presentation: Medulloblastoma: This is a type of brain tumor that can cause headache, nausea, vomiting, vision problems, and other neurological symptoms. The presence of a possible soft-tissue mass in the region of the fourth ventricular outlet on CT scan raises suspicion for this diagnosis. Meningitis: This is an inflammation of the meninges…	0		10	1. Primary CNS Lymphoma 2. Carcinomatous Meningitis 3. Cryptococcal Meningitis 4. Neurosarcoidosis 5. Tuberculosis Meningitis 6. Lyme Neuroborreliosis 7. Neurosyphilis 8. Coccidioidomycosis 9. Toxoplasmosis 10. Guillain-Barr√© Syndrome.	0		10	Differential diagnosis for the underlying cause of this presentation: Central nervous system lymphoma Multiple sclerosis Idiopathic intracranial hypertension Subarachnoid hemorrhage Meningioma Brain abscess Neurosarcoidosis Tuberculosis meningitis Cryptococcal meningitis Viral meningitis Bacterial meningitis The diagnosis that best explains all the features of the presentation is central nervous …	0		11	Based on the clinical presentation, history, and examination findings, the following is a list of differential diagnoses, ordered from the most likely to the least likely: Central nervous system infection (e.g., bacterial, viral, or fungal meningitis, or brain abscess): Given the patient's history of opioid use disorder with heroin injection, presence of track marks, and progressive neurological …	1	3	10	Based on the provided case presentation, the differential diagnoses for the underlying cause of this presentation are: Central nervous system (CNS) infection: a. Bacterial meningitis b. Tuberculous meningitis c. Fungal meningitis (Cryptococcus, Candida, Aspergillus, etc.) d. Neurocysticercosis e. Neurotoxoplasmosis f. Lyme disease Neoplastic etiology: a. Primary CNS lymphoma b. Glioma c. Metastat…	1	4	20	1. Meningitis (bacterial, viral, or fungal) - The patient's headaches, nausea, vomiting, and blurred vision, as well as the leptomeningeal enhancement on MRI and neutrophil predominance in the cerebrospinal fluid (CSF), suggest a possible meningeal infection. 2. Tuberculosis (central nervous system) - The patient's history of homelessness and incarceration, as well as her presenting symptoms and …	1	3	11	1. Meningitis - Bacterial, viral, fungal, or tuberculous 2. Central nervous system or leptomeningeal neoplasm 3. Neurosarcoidosis or granulomatous inflammation 4. Tuberculosis meningitis or infection 5. Idiopathic intracranial hypertension or secondary causes (e.g. obesity, medications) 6. Obstructive hydrocephalus due to structural abnormalities, aberrant anatomy, or adhesions 7. Cerebrospinal f…	1	3	15		2e-06	Chronic Candida albicans meningitis.	34	https://doi.org/10.2217/fmb-2020-0006
Case 26-2022	A 48-year-old woman was admitted to this hospital because of multiple lung and liver lesions identified during an evaluation for abdominal pain. The patient had been in her usual state of health until 10 days before this admission, when burning epigastric pain developed after she ate a meal. Nausea and vomiting occurred 1 hour later; there was no diarrhea. After the pain persisted for 8 hours, sh…	Differential Diagnosis Dr. Krishna P. Reddy: This 48-year-old woman, who smoked tobacco but was otherwise healthy, presented with abdominal pain, nausea, and vomiting, which resolved during the hospitalization. Imaging studies showed liver lesions, lung parenchymal disease, and breast and thyroid nodules. Biopsy of a liver lesion revealed an eosinophil-predominant inflammatory infiltrate. Breast …	Langerhans-cell histiocytosis of the lung and liver.	Please read the following case, and provide a thorough and specific list of differential diagnosis for the underlying cause of this presentation. Please list the diagnosis that most explains all the features of the presentation first, and include rare diagnoses if they are the best explanation for the presentation. "A 48-year-old woman was admitted to this hospital because of multiple lung and li…	Differential diagnoses for the underlying cause of this presentation include: 1. Metastatic cancer with primary unknown: Multiple lesions in the liver, lungs, and breast strongly suggest metastatic cancer. However, no primary site was identified, making this diagnosis uncertain. 2. Eosinophilic pneumonia: The finding of eosinophilic infiltration in the liver biopsy, along with the patient's histo…	0		7	Eosinophilic granulomatosis with polyangiitis (EGPA, formerly known as Churg-Strauss syndrome): This is a rare autoimmune disease that can affect multiple organs, including the lungs, liver, and gastrointestinal tract. Patients with EGPA typically present with asthma, allergic rhinitis, and peripheral eosinophilia. The presence of multiple lung nodules, peripheral eosinophilia, and liver lesions …	0		9	1. Metastatic cancer - this diagnosis would explain the multiple lung and liver lesions seen on imaging, as well as the patient's abdominal pain and abnormal laboratory values. However, additional diagnostic testing would be necessary to identify the primary cancer site. 2. Eosinophilic granulomatosis with polyangiitis (Churg-Strauss syndrome) - this rare condition is characterized by asthma, eos…	0		11	Metastatic cancer (most likely diagnosis): The presence of multiple liver and lung lesions with peripheral enhancement is consistent with metastatic cancer. The patient's smoking history increases her risk for lung cancer. The biopsy results showing eosinophilic infiltration and steatosis may indicate a primary tumor of the liver, such as hepatocellular carcinoma or cholangiocarcinoma. Lymphoma: …	0		8	Based on the provided case information, the following is a list of differential diagnoses for the underlying cause of the patient's presentation, starting with the most likely explanation: Metastatic cancer with an unknown primary origin: The presence of multiple lung, liver, and thyroid nodules, as well as the nodule in the right breast, strongly suggests the possibility of metastatic cancer. Th…	0		7	Metastatic cancer (primary site unknown): The presence of multiple lung and liver lesions, thyroid nodules, and a breast nodule raises the suspicion of metastatic cancer. The primary site could be the breast, thyroid, or another undetermined location. Disseminated fungal infection: The patient's work in a medical laboratory and history of exposure to mold could predispose her to a fungal infectio…	0		7	1. Eosinophilic granulomatosis with polyangiitis (EGPA, formerly known as Churg-Strauss Syndrome): This diagnosis best explains the multiple lung and liver lesions, eosinophilic infiltration in the liver, history of smoking, and mild shortness of breath in the patient. 2. Metastatic malignancy: The presence of liver lesions, lung nodules, and a 1.7-cm nodule in the right breast raises the possibi…	1	5	7	1. Metastatic malignancy (such as from the breast or thyroid) leading to diffuse liver and lung involvement 2. Eosinophilic granulomatosis with polyangiitis (Churg-Strauss syndrome) causing eosinophilic infiltration of the liver and lung nodules 3. Disseminated fungal infection, such as histoplasmosis or coccidioidomycosis, causing lung and liver lesions 4. Disseminated tuberculosis with hepatic …	1	8	10		2e-06	Langerhans-cell histiocytosis	10701	https://www.ncbi.nlm.nih.gov/books/NBK430885/
Case 27-2022	A 32-year-old man was admitted to this hospital after 2 weeks of confusion and headache and 2 days of fever. The patient had been in his usual state of health until 1 month before admission, when his wife noted that he began to have behavior suggestive of anxiety. Two weeks before admission, his wife noted that he began to have confusion; for example, he was unable to recall the ages of his child…	Differential Diagnosis Dr. Nagagopal Venna: I was involved in the care of this patient and am aware of the diagnosis. This 32-year-old man was noted by his wife to have progressive confusion over a 2-week period and was brought to this hospital after headache, neck stiffness, and fever developed. Of note, the patient had a history of Beh√ßet‚Äôs disease with multisystemic complications, which had…	Encephalitis due to Behçet's disease.	Please read the following case, and provide a thorough and specific list of differential diagnosis for the underlying cause of this presentation. Please list the diagnosis that most explains all the features of the presentation first, and include rare diagnoses if they are the best explanation for the presentation. "A 32-year-old man was admitted to this hospital after 2 weeks of confusion and he…	1. Meningoencephalitis (viral, bacterial, fungal, protozoal) 2. Neuro-Beh√ßet's disease 3. Drug-induced lupus erythematosus 4. Stroke or Transient ischemic attack 5. Encephalitis 6. Central nervous system vasculitis 7. Cerebral hemorrhage 8. Progressive multifocal leukoencephalopathy 9. Hashimoto's encephalopathy 10. Acute disseminated encephalomyelitis 11. Multiple sclerosis 12. Systemic lupus e…	1	2	12	The differential diagnosis for the underlying cause of the presentation includes: Neuro-Behçet's disease: Behçet's disease is a systemic vasculitis that can affect multiple organ systems, including the central nervous system. Neuro-Behçet's disease can present with a range of symptoms, including headache, confusion, fever, and somnolence. The patient's history of Behçet's disease and the absence …	1	1	10	1. CNS vasculitis 2. CNS infection (viral, bacterial, fungal) 3. Meningitis or encephalitis 4. Beh√ßet's disease with CNS involvement 5. Stroke or transient ischemic attack 6. Epilepsy or seizures 7. Acute disseminated encephalomyelitis 8. Guillain-Barre syndrome 9. Sarcoidosis 10. Multiple sclerosis 11. Neurosyphilis 12. Cerebral venous thrombosis 13. Tumor or malignancy 14. Autoimmune encephali…	1	4	15	Possible Differential Diagnosis: Meningitis: Given the patient's symptoms of headache, neck stiffness, and CSF findings during the previous episode, meningitis is a possible differential diagnosis. However, the patient's presentation is atypical for meningitis, as he has no neck stiffness and only mild injection in the left eye. Encephalitis: Encephalitis is another possible differential diagnosi…	1	2	10	Based on the provided case information, the following is a list of differential diagnoses for the underlying cause of this presentation, starting with the most likely explanation: Neuro-Behçet's disease: Given the patient's extensive history of Behçet's disease and the presence of neurological symptoms such as confusion, headache, neck stiffness, and somnolence, the involvement of the central ner…	1	1	9	Neuro-BehÃ§et's disease: Given the patient's history of BehÃ§et's disease with multiple systemic manifestations, the recent onset of confusion, headache, and neck stiffness could indicate central nervous system involvement. Meningitis (bacterial, viral, fungal, or tuberculous): The patient's symptoms of fever, headache, neck stiffness, and altered mental status are classic signs of meningitis. Th…	1	1	7	1. Neuro-BehÃ§etâ€™s disease: Given the patient's history of BehÃ§et's disease and the current presentation of confusion, headache, and neck stiffness, the involvement of the central nervous system is a strong possibility. 2. Meningitis: The presentation of confusion, headache, neck stiffness, and fever could potentially be due to meningitis. The patient has a history of lymphocyte-predominant me…	1	1	10	1. Neuro-BehÃ§et's disease: This diagnosis best explains the patient's symptoms and medical history, including confusion, headache, neck stiffness, fever, and a history of BehÃ§et's disease with various complications in multiple organ systems. 2. Bacterial meningitis: The patient presents with fever, headache, and confusion, which are classic symptoms of meningitis. However, the history of BehÃ§e…	1	1	8		5e-06	Neuro-Bechet's Disease	477	https://pubmed.ncbi.nlm.nih.gov/19405011/
Case 28-2022	A 59-year-old man was evaluated in the rheumatology clinic of this hospital because of headache and progressive neurologic dysfunction. Ten months before this evaluation, daily fever with a temperature of up to 38.9¬∞C, chills, myalgias, drenching night sweats, and pressure and pain in both cheeks and ears developed. The patient was evaluated by his primary care physician. He reported rhinorrhea …	Differential Diagnosis Dr. David Jayne: This 59-year-old man‚Äôs illness began with fever, sweats, rhinorrhea, and maxillary tenderness, and he was presumably treated for sinusitis. The development of headache, jaw soreness, scalp tenderness, polymyalgia, diplopia, and marked elevations in the erythrocyte sedimentation rate and the level of C-reactive protein prompted a temporal artery biopsy tha…	Granulomatosis with polyangiitis.	Please read the following case, and provide a thorough and specific list of differential diagnosis for the underlying cause of this presentation. Please list the diagnosis that most explains all the features of the presentation first, and include rare diagnoses if they are the best explanation for the presentation. "A 59-year-old man was evaluated in the rheumatology clinic of this hospital becau…	1. IgG4-related disease 2. Giant-cell arteritis 3. Meningioma 4. Carotid-cavernous fistula 5. Lymphoma 6. Granulomatosis with polyangiitis 7. Sarcoidosis 8. Lyme disease 9. Syphilis 10. Tuberculosis Note: The diagnosis of IgG4-related disease was eventually made via biopsy, but the initial presentation was consistent with giant-cell arteritis. Other possible causes of the symptoms, such as mening…	1	6	10	Differential Diagnosis for the underlying cause of the patient's presentation: Giant cell arteritis: The patient's presentation is highly suggestive of giant cell arteritis, given the classic symptoms of headache, fever, and jaw claudication, along with an elevated ESR and CRP. The temporal artery biopsy was not definitive, but the patient's response to treatment with prednisone supports the diag…	1	2	10	1. IgG4-related disease 2. Giant-cell arteritis 3. CNS lymphoma 4. Lyme disease 5. Multiple sclerosis 6. Neurosarcoidosis 7. Granulomatosis with polyangiitis (Wegener's) 8. Idiopathic hypertrophic pachymeningitis (IHP) 9. Primary central nervous system vasculitis (PCNSV) 10. Behcet's disease	1	7	10	Differential diagnosis for the underlying cause of this presentation may include: Giant cell arteritis: Headache, scalp tenderness, and jaw pain are common symptoms of giant cell arteritis. The presence of an elevated erythrocyte sedimentation rate and C-reactive protein level supports this diagnosis. The biopsy findings of chronic inflammation of the temporal artery and fibrinoid necrosis of an …	1	2	8	IgG4-related disease: This diagnosis best explains the patient's presentation, including chronic inflammation with a large number of polyclonal plasma cells, more than 100 IgG4+ plasma cells per high-power field, storiform fibrosis, and obliterative venulitis seen in the meningeal biopsy. The patient also showed a partial response to rituximab, which is consistent with IgG4-related disease. Giant…	1	3	6	Based on the provided case, here is a list of differential diagnoses for the underlying cause of this patient's presentation: IgG4-related disease: This diagnosis best explains the patient's presentation, given the history of headaches, facial pain, neurologic dysfunction, and the meningeal biopsy results showing CD68+ macrophages, CD3+ T lymphocytes, CD20+ B lymphocytes, and more than 100 IgG4+ …	1	3	7	1. IgG4-related disease - this best explains the overall presentation including headaches, fever, night sweats, sinus and facial pain, jaw soreness, scalp tenderness, hip and shoulder stiffness, weight loss, double vision, and neurologic dysfunction, as well as abnormal MRI findings and meningeal biopsy results. 2. Giant-cell arteritis - this was initially suspected and treated based on clinical …	1	3	9	1. IgG4-related disease: This diagnosis best explains the patient's symptoms of fever, headache, facial pain, diplopia, cranial nerve palsies, and abnormal imaging findings. Histopathological examination of the meningeal biopsy also supports this diagnosis, revealing densely fibrotic and chronically inflamed dura mater, storiform fibrosis, and more than 100 IgG4+ plasma cells per high-power field…	1	3	8		1e-05	Granulomatosis with polyangiitis.	9806	https://www.ncbi.nlm.nih.gov/books/NBK557827/
Case 29-2022	A 33-year-old man was evaluated in the gastroenterology clinic of this hospital because of relapsing chronic diarrhea and a diagnosis of autoimmune enteropathy. Diarrhea had initially developed in the patient during infancy. When the patient was 2 months of age, he had poor growth and frequent bowel movements with loose stools. When he began to eat solid foods, diarrhea continued, and a hydrolyze…	Differential Diagnosis Dr. Francis P. Colizzo: I participated in the care of this patient and am aware of the final diagnosis. This 33-year-old man had a long-standing diagnosis of autoimmune enteropathy, which had been complicated by hemolytic anemia, membranous nephropathy with proteinuria, and eczema. Symptoms were intermittently controlled with the administration of glucocorticoids and other …	Immune dysregulation, polyendocrinopathy, enteropathy, X-linked (IPEX) syndrome.	Please read the following case, and provide a thorough and specific list of differential diagnosis for the underlying cause of this presentation. Please list the diagnosis that most explains all the features of the presentation first, and include rare diagnoses if they are the best explanation for the presentation. "A 33-year-old man was evaluated in the gastroenterology clinic of this hospital b…	1. Autoimmune enteropathy 2. Celiac disease 3. Inflammatory bowel disease (Crohn's disease or ulcerative colitis) 4. Irritable bowel syndrome 5. Chronic infection (e.g. giardiasis) 6. Lymphoma 7. Microscopic colitis 8. Food allergies or intolerances 9. Short bowel syndrome 10. Tropical sprue 11. Whipple's disease 12. Adenocarcinoma of the small bowel or colon 13. Amyloidosis 14. Intestinal ischem…	0		15	Differential diagnosis: Celiac disease: Chronic diarrhea, villous atrophy, and crypt hyperplasia are common findings in celiac disease, and the patient had negative skin-prick testing for cow's milk and soy antigens, which suggests food allergy was unlikely. However, the lack of response to a gluten-free diet and the negative endomysial antibody test make celiac disease less likely. Inflammatory …	0		8	1. Autoimmune enteropathy 2. Celiac disease 3. Inflammatory bowel disease (Crohn's disease or ulcerative colitis) 4. Microscopic colitis 5. Infectious diarrhea (bacterial, viral, or parasitic) 6. Food allergies or intolerances 7. Short bowel syndrome 8. Gastrointestinal lymphoma 9. Hypertensive enteropathy 10. Radiation enteropathy 11. Intestinal tuberculosis 12. Ischemic colitis 13. Diverticulit…	0		18	Celiac disease - a common cause of villous atrophy and chronic diarrhea, often responding to a gluten-free diet. Negative endomysial antibody testing does not completely rule out celiac disease. Inflammatory bowel disease (IBD) - such as Crohn's disease or ulcerative colitis, which can present with chronic diarrhea and intestinal inflammation. The patchy colitis sparing the rectum in this case co…	0		8	Based on the provided case, here is a list of differential diagnoses for the underlying cause of this presentation, with the most likely diagnosis listed first: Autoimmune enteropathy: The patient's history of recurrent diarrhea, villous atrophy, crypt hyperplasia, and active enteritis on histopathological examination, as well as the presence of anti-epithelial cell antibodies, suggest autoimmune…	0		8	Based on the provided case, the following is a list of differential diagnoses, starting with the diagnosis that best explains the presentation: Autoimmune enteropathy: The patient's clinical history of relapsing chronic diarrhea, villous atrophy, crypt hyperplasia, and diffuse inflammation found in small-intestinal biopsy specimens, as well as the presence of anti-epithelial cell antibodies, stro…	1	6	6	1. Autoimmune enteropathy: This diagnosis best explains the patient's recurrent diarrhea, villous atrophy, crypt hyperplasia, and active enteritis. Additionally, the patient has a history of high blood IgE levels and positive anti-epithelial cell antibodies. The patient's response to immunosuppressive therapy supports this diagnosis. 2. Celiac disease: The patient's gastrointestinal symptoms, vil…	0		8	1. Autoimmune enteropathy: This diagnosis most explains the presentation, as the patient has a history of chronic diarrhea, villous atrophy, and high anti-epithelial cell antibodies. Additionally, the patient's symptoms improved with immunosuppressive treatment, which supports this diagnosis. 2. Celiac disease: Although the patient has villous atrophy and crypt hyperplasia, negative antibody test…	0		7		1e-06	Immune dysregulation, polyendocrinopathy, enteropathy, X-linked (IPEX) syndrome.	202	https://www.ncbi.nlm.nih.gov/pmc/articles/PMC7995986/
Case 3-2022	A 14-year-old boy was admitted to this hospital because of fatigue, fever, joint pain, abdominal cramping, and diarrhea. The patient had been well until 2 weeks before this admission, when fatigue and fever developed on his final day of summer camp. He was taken to the primary care clinic at another hospital and was told that he had a viral infection. Nine days before this admission, new mild sor…	Differential Diagnosis Dr. Kerstin Zanger: This previously healthy 14-year-old boy presented with fatigue, fever, sore throat, joint pain, abdominal cramping, nausea, vomiting, and watery diarrhea. The laboratory test results were notable for elevated levels of inflammatory markers and mild leukocytosis with neutrophilic predominance. Among his mainly nonspecific symptoms, the two that stand out …	Inflammatory bowel disease (Crohn's disease).	Please read the following case, and provide a thorough and specific list of differential diagnosis for the underlying cause of this presentation. Please list the diagnosis that most explains all the features of the presentation first, and include rare diagnoses if they are the best explanation for the presentation. "A 14-year-old boy was admitted to this hospital because of fatigue, fever, joint …	1. Lyme disease 2. Juvenile idiopathic arthritis 3. Systemic lupus erythematosus 4. Reactive arthritis 5. Crohn's disease 6. Ulcerative colitis 7. Infectious mono 8. Rheumatic fever 9. Septic arthritis 10. Whipple's disease 11. Inflammatory bowel disease-associated arthritis 12. Hemolytic uremic syndrome 13. Reiter's syndrome 14. Kawasaki disease 15. Leukemia 16. Henoch-Schonlein purpura 17. Behc…	1	5	20	1. Lyme disease 2. Rheumatic fever 3. Inflammatory bowel disease 4. Juvenile idiopathic arthritis 5. Systemic lupus erythematosus 6. Infectious mononucleosis 7. Viral arthritis 8. Reactive arthritis 9. Kawasaki disease 10. Whipple's disease 11. Hemolytic uremic syndrome 12. Toxic shock syndrome 13. Leptospirosis 14. Brucellosis 15. Rocky Mountain spotted fever 16. Tularemia	1	3	16	1. Lyme disease 2. Infectious mononucleosis 3. Viral arthritis 4. Rheumatoid arthritis 5. Systemic lupus erythematosus 6. Juvenile idiopathic arthritis 7. Inflammatory bowel disease 8. Intestinal infection (e.g. salmonella, shigella) 9. Kawasaki disease 10. Toxic shock syndrome 11. Leukemia 12. Henoch-Schonlein purpura 13. Reactive arthritis 14. Sarcoidosis 15. Whipple disease	1	7	15	1. Lyme disease: This is the most likely diagnosis given the patient's symptoms and history. The tick exposure, erythema migrans (not mentioned in the case), joint pain and swelling, and elevated white-cell count and erythrocyte sedimentation rate (ESR) are all highly suggestive of Lyme disease. The negative Lyme test result may be due to the timing of the test, as it may take several weeks for a…	1	4	9	Lyme disease: The patient's history of camping and hiking in wooded areas in New England, presence of fever, joint pain, and elevated ESR make Lyme disease a likely possibility. Although a blood test for Lyme disease was performed, the results are not mentioned. Doxycycline treatment was started, which would be appropriate if Lyme disease were suspected. Reactive arthritis: The patient's presenta…	1	3	7	Lyme disease: Given the patient's history of outdoor exposure in a rural area of New England, presence of fever, joint pain, and elevated erythrocyte sedimentation rate, Lyme disease is a strong possibility. Although the patient did not recall any tick bites, he did notice a tick on his clothing. Reactive arthritis: The patient's joint pain, fever, and gastrointestinal symptoms could be due to re…	1	4	8	1. Lyme disease: The patient had a history of camping and hiking in wooded areas of New England and exposure to ticks. His symptoms include fatigue, fever, joint pain, and elevated white-cell count and erythrocyte sedimentation rate, which are all consistent with Lyme disease. 2. Reactive arthritis: The patient's recent history of a gastrointestinal illness could suggest reactive arthritis. Sympt…	1	4	8	1. Reactive arthritis: This condition can be triggered by gastrointestinal infections and presents with joint pain, fever, and sometimes abdominal pain and diarrhea. 2. Lyme disease: The patient's history of camping and hiking in wooded areas in New England and a tick exposure make Lyme disease a possibility. It can present with fever, fatigue, joint pain, and sometimes gastrointestinal symptoms.…	1	3	10		0.0002	Inflammatory bowel disease (Crohn's disease).	57293	https://www.gastrojournal.org/article/S0016-5085(23)05357-X/abstract
Case 3-2023	A 16-year-old girl was admitted to this hospital because of abdominal pain and bloody diarrhea. The patient had been well until 5 weeks before this admission, when diarrhea and intermittent, diffuse, crampy abdominal pain developed. During the subsequent week, the diarrhea occurred more frequently, and the abdominal pain worsened in severity, such that it sometimes awoke the patient from sleep. F…	Differential Diagnosis Dr. Stacy A. Kahn: The process of generating a differential diagnosis is iterative. The framework shown below ‚Äî gather, analyze, review and revise, and create a differential diagnosis ‚Äî is a simple approach that reminds us that the differential diagnosis often evolves and should be reviewed and revised as we gather new information and analyze the data. GATHER This patie…	Catastrophic antiphospholipid syndrome.	Please read the following case, and provide a thorough and specific list of differential diagnosis for the underlying cause of this presentation. Please list the diagnosis that most explains all the features of the presentation first, and include rare diagnoses if they are the best explanation for the presentation. "A 16-year-old girl was admitted to this hospital because of abdominal pain and bl…	Differential diagnosis for the underlying cause of presentation: 1. Inflammatory bowel disease (IBD): IBD is the most likely diagnosis because of the presence of bloody diarrhea, abdominal pain, weight loss, fatigue, and mild joint pain. Additionally, the biopsy of the large bowel wall showed multifocal patchy areas of hypoattenuation, which is characteristic of IBD. 2. Infectious colitis: Despit…	0		10	Differential Diagnosis for a 16-year-old girl with abdominal pain and bloody diarrhea: Inflammatory Bowel Disease (IBD) - ulcerative colitis or Crohn's disease are common causes of chronic bloody diarrhea and abdominal pain, with systemic symptoms such as weight loss and fatigue. Infectious colitis - Bacterial pathogens like Salmonella, Shigella, Campylobacter, Escherichia coli, or viral agents l…	0		13	Differential diagnosis: 1. Inflammatory bowel disease (IBD) (most likely): The patient's symptoms of bloody diarrhea, abdominal pain, weight loss, anemia, and inflammation on biopsy suggest IBD as the most likely diagnosis. The onset of symptoms, lack of response to initial treatment, and involvement of both the upper and lower gastrointestinal tract are consistent with either Crohn's disease or …	0		10	The patient's clinical features are consistent with inflammatory bowel disease (IBD), and the differential diagnoses for the underlying cause of the presentation are: Ulcerative colitis (UC) Crohn's disease (CD) Infectious colitis Ischemic colitis Eosinophilic gastroenteritis Behcet's disease Microscopic colitis Lymphocytic colitis Diverticulitis with bleeding Colorectal cancer	0		9	Based on the patient's presentation, the following differential diagnoses can be considered: Inflammatory bowel disease (IBD) - Ulcerative colitis or Crohn's disease: The patient's symptoms of abdominal pain, bloody diarrhea, weight loss, and malaise, along with the elevated inflammatory markers (C-reactive protein and erythrocyte sedimentation rate), are highly suggestive of IBD. The endoscopic …	0		7	Based on the provided case, the following is a list of differential diagnoses for the underlying cause of this presentation, ordered from most likely to least likely: Inflammatory bowel disease (IBD) - specifically, ulcerative colitis or Crohn's disease. The presentation of bloody diarrhea, abdominal pain, weight loss, fatigue, and elevated inflammatory markers (C-reactive protein and erythrocyte…	0		8	1. Inflammatory bowel disease (ulcerative colitis or Crohn's disease): Explains the abdominal pain, bloody diarrhea, fatigue, malaise, weight loss, decreased appetite, and elevated inflammatory markers. 2. Colorectal cancer: History of colorectal cancer in maternal grandfather, but much less likely due to young age. 3. Diverticulitis: Family history of diverticulosis, but this is rare in young pa…	0		13	1. Inflammatory bowel disease (Crohn's disease or ulcerative colitis): The patient's abdominal pain, bloody diarrhea, weight loss, fatigue, malaise, and joint pains are highly suggestive of inflammatory bowel disease (IBD). The findings of diffuse mild inflammation during EGD and abnormal CT findings are also consistent with IBD. 2. Gastrointestinal infection (e.g., enterohemorrhagic E. coli, ent…	0		7		1e-06	Catastrophic antiphospholipid syndrome.	892	https://www.mdpi.com/2073-4468/13/1/21
Case 30-2022	A newborn girl was transferred to the neonatal intensive care unit (ICU) of this hospital because of hypoglycemia. The patient‚Äôs mother was a 27-year-old woman (gravida 1, para 1) who had received prenatal care at another hospital. At 34 weeks of gestation, an ultrasonographic survey of the fetal anatomy had reportedly revealed an avascular intraabdominal cystic mass that was located near the b…	Differential Diagnosis Dr. Sarbattama Sen: Blood glucose levels are physiologically low immediately after birth and approach levels observed in older children or adults after 72 hours of life.1 This newborn girl had persistent hypoglycemia postnatally, for which she received a continuous infusion of dextrose to maintain normoglycemia. To determine the cause of her prolonged hypoglycemia, it is he…	Neonatal hypoglycemia due to biologically active teratoma and the Sotos syndrome.	Please read the following case, and provide a thorough and specific list of differential diagnosis for the underlying cause of this presentation. Please list the diagnosis that most explains all the features of the presentation first, and include rare diagnoses if they are the best explanation for the presentation. "A newborn girl was transferred to the neonatal intensive care unit (ICU) of this …	Differential diagnosis: 1. Sacrococcygeal teratoma with tumor hypoglycemia syndrome 2. Beckwith-Wiedemann syndrome 3. Transient neonatal diabetes 4. Congenital hyperinsulinism 5. Insulinoma 6. Adrenal insufficiency 7. Growth hormone deficiency 8. Hypothyroidism 9. Galactosemia 10. Fructosemia The most likely explanation for the presentation is sacrococcygeal teratoma with tumor hypoglycemia syndr…	0		10	The differential diagnosis for the underlying cause of this presentation includes: Congenital hyperinsulinism (most likely) Beckwith-Wiedemann syndrome Insulinoma of the pancreas Growth hormone deficiency Hypopituitarism Hypothyroidism Adrenal insufficiency Mucopolysaccharidoses Glycogen storage disease Hereditary fructose intolerance Galactosemia Fatty acid oxidation disorders Medium-chain acyl-…	0		20	1. Sacrococcygeal teratoma ‚Äì based on prenatal ultrasound findings and the presence of a solid-cystic mass anterior to the sacrum on abdominal and pelvic ultrasonography and MRI. 2. Hypoxic-ischemic encephalopathy ‚Äì as indicated by poor respiratory effort, hypotonia, and Apgar scores of 7 and 9 at 1 and 5 minutes, respectively. 3. Congenital hypothyroidism ‚Äì as indicated by the infant‚Äôs j…	1	1	9	Differential diagnoses for the underlying cause of the newborn's presentation include: Sacrococcygeal teratoma (SCT): SCT is a rare tumor that arises from embryonic cells of the coccyx and sacrum. It can be benign or malignant and can cause hypoglycemia due to the secretion of insulin-like growth factors by the tumor. The presence of a sacral dimple, solid-cystic mass anterior to the sacrum on ul…	1	1	6	Based on the provided case information, here is a list of differential diagnoses for the underlying cause of the presentation, with the most likely diagnosis listed first: Congenital hyperinsulinism: Persistent hypoglycemia, even with high glucose infusion rates, and no apparent external cause could indicate a problem with insulin regulation in the newborn. Sacrococcygeal teratoma: The solid-cyst…	1	2	7	Based on the information provided, here is a list of differential diagnoses for the newborn girl's presentation, ordered from most likely to least likely: Congenital sacrococcygeal teratoma (SCT): The presence of a solid-cystic mass near the sacrum with no involvement of the sacral spine, as well as the anteriorly displaced anus, are suggestive of a sacrococcygeal teratoma. Persistent hyperinsuli…	1	1	7	1. Persistent hyperinsulinism: Hypoglycemia in infancy can be caused by conditions like persistent hyperinsulinism, which is characterized by excessive insulin production resulting in low blood sugar levels. This could explain the patient's low blood glucose levels despite the high glucose infusion rate. 2. Congenital hypopituitarism: This condition involves a deficiency of one or more pituitary …	1	6	9	1. Hyperinsulinism: Persistent hypoglycemia, jitteriness, and the need for high glucose infusion rates to maintain normoglycemia are consistent with hyperinsulinism. This could be a primary genetic disorder or secondary to another underlying condition. 2. Congenital adrenal hyperplasia: This could potentially explain the hypoglycemia and anteriorly displaced anus but would not account for the pre…	1	4	8		2.5e-05	Sacrococcygeal teratoma	1630	https://www.sciencedirect.com/science/article/pii/S2213576620302396
Case 31-2022	A 72-year-old man was transferred to this hospital because of heartburn, nausea, and the inability to eat solid and liquid food. The patient had a history of gastroesophageal reflux disease. The symptoms had been well controlled with the use of daily omeprazole therapy until 11 months before this admission, when heartburn recurred despite treatment. At that time, the patient also noticed nausea a…	Differential Diagnosis Dr. Kyle D. Staller: This 72-year-old man presented with heartburn and nausea with the progressive inability to tolerate solids and liquids. How can the patient‚Äôs symptoms help us understand the underlying process? HEARTBURN The predominant mechanism of gastroesophageal reflux is thought to be transient relaxation of the lower esophageal sphincter, but there are other mec…	Linitis plastica (invasive gastric adenocarcinoma).	Please read the following case, and provide a thorough and specific list of differential diagnosis for the underlying cause of this presentation. Please list the diagnosis that most explains all the features of the presentation first, and include rare diagnoses if they are the best explanation for the presentation. "A 72-year-old man was transferred to this hospital because of heartburn, nausea, …	Differential Diagnosis: 1. Gastric Cancer: Abnormal circumferential wall thickening, delayed gastric emptying, weight loss, anorexia, nausea, and inability to tolerate oral intake. 2. Progressive Diffuse Leukoencephalopathy: Nausea, anorexia, weight loss. 3. Sarcoidosis: Multiple pulmonary nodules, abdominal pain. 4. Superior Mesenteric Artery Syndrome: Early satiety, nausea, vomiting, abdominal …	1	1	10	The differential diagnosis for the underlying cause of this presentation includes: Gastric cancer: gastric cancer can present with symptoms such as heartburn, nausea, early satiety, and difficulty eating solid and liquid foods. It can also cause delayed gastric emptying and weight loss. Abnormal wall thickening in the stomach, particularly at the antrum, incisura, and pyloric canal can be seen on…	1	1	7	1. Gastric cancer 2. Eosinophilic gastritis 3. Sarcoidosis 4. Amyloidosis 5. Systemic sclerosis (scleroderma) 6. Crohn's disease 7. Autoimmune enteropathy 8. Lymphoma 9. Gastric bezoar 10. Idiopathic gastroparesis (may be a secondary diagnosis)	1	1	10	Based on the patient's history and symptoms, the following is a list of differential diagnoses: Achalasia Diabetic gastroparesis Idiopathic gastroparesis Gastric outlet obstruction due to cancer or peptic ulcer disease Gastric dysmotility due to scleroderma or other connective tissue disease Gastric dysmotility due to Parkinson's disease or other neurological conditions Gastric dysmotility due to…	1	4	13	Based on the provided case presentation, here is a list of differential diagnoses, with the most likely explanation listed first: Gastric malignancy (e.g., gastric adenocarcinoma): The patient has a significant history of weight loss, heartburn, nausea, inability to eat, and severely delayed gastric emptying. The CT findings of abnormal circumferential wall thickening in the stomach, particularly…	1	2	7	Based on the patient's presentation, the following is a list of differential diagnoses: Gastric cancer: The patient's age, history of weight loss, inability to eat solid and liquid food, and the CT findings of abnormal circumferential wall thickening in the stomach, particularly at the antrum, incisura, and pyloric canal, suggest gastric cancer as the most likely diagnosis. The presence of multip…	1	2	9	1. Gastric cancer: The abnormal circumferential wall thickening in the stomach, especially at the antrum, incisura, and pyloric canal, weight loss, and patient's age are highly suggestive of gastric cancer. The presence of pulmonary and hepatic nodules could be metastatic lesions from the primary gastric cancer. 2. Metastatic adenocarcinoma: Given the patient's history of colonic tubular adenomas…	1	3	8	1. Gastric cancer: The abnormal circumferential wall thickening in the stomach, particularly at the antrum, incisura, and pyloric canal, loss of weight, and the patient's age are consistent with gastric cancer. 2. Esophageal cancer: Given the history of gastroesophageal reflux disease, the loss of weight, the presence of wall thickening in scattered areas of the upper and lower segments of the es…	1	4	10		2e-05	Linitis plastica	629	https://seer.cancer.gov/statfacts/html/stomach.html
Case 32-2022	A 76-year-old man was evaluated in the intensive care unit of this hospital for persistent postoperative cardiogenic shock and new diffuse rash after undergoing mitral-valve replacement. Two months before this evaluation, the patient was admitted to another hospital with anorexia, generalized weakness, fatigue, and edema. Examination of the lungs was notable for decreased breath sounds and basila…	Differential Diagnosis Dr. Akshay S. Desai: This 76-year-old man presented with new-onset heart failure in the context of S. aureus bacteremia that was possibly associated with a dental abscess that had been identified 6 weeks before admission to the other hospital. Initial evaluation of the patient at the other hospital revealed mitral-valve endocarditis with a vegetation on the anterior mitral-…	Eosinophilic myocarditis and drug reaction with eosinophilia and systemic symptoms (DRESS).	Please read the following case, and provide a thorough and specific list of differential diagnosis for the underlying cause of this presentation. Please list the diagnosis that most explains all the features of the presentation first, and include rare diagnoses if they are the best explanation for the presentation. "A 76-year-old man was evaluated in the intensive care unit of this hospital for p…	1. Infective endocarditis with complications (mitral regurgitation, vegetation, septicemia) 2. Cardiogenic shock 3. Acute pulmonary edema 4. Acute renal failure 5. Coronary artery disease with stenosis 6. Atrial fibrillation with rapid ventricular response 7. Tricuspid regurgitation 8. Multifocal ventricular premature beats 9. Right bundle-branch block 10. Hypothyroidism 11. Deep vein thrombosis …	1	12	16	The differential diagnosis for the underlying cause of this patient's presentation includes the following: Infective endocarditis Heart failure Atrial fibrillation Coronary artery disease Drug-induced cardiotoxicity Acute respiratory distress syndrome (ARDS) Thyroid disorders Kidney disease Liver disease Chronic obstructive pulmonary disease (COPD) Pulmonary embolism Acute renal failure Sepsis Hy…	0		20	Differential diagnosis: 1. Endocarditis with severe mitral valve regurgitation and resultant cardiogenic shock, pulmonary edema, pleural effusions, and rash. 2. Acute coronary syndrome with myocardial infarction and resultant cardiogenic shock, pulmonary edema, pleural effusions, and rash (less likely given normal cardiac enzymes). 3. Hypothyroidism exacerbation with resultant cardiogenic shock, …	1	6	10	Based on the given case, the following is a list of differential diagnoses that could explain the patient's presentation: Infective endocarditis: This is a possible diagnosis due to the presence of a vegetation on the mitral valve leaflet, which could cause mitral regurgitation, and growth of MSSA in four blood cultures. The patient has a history of a painful dental abscess, which may have been t…	0		9	Infective endocarditis: The patient has a history of positive blood cultures for methicillin-sensitive Staphylococcus aureus (MSSA), dental abscess, mitral valve vegetation, and mitral regurgitation. These features are consistent with infective endocarditis. Despite treatment with oxacillin, the patient's condition deteriorated, suggesting possible treatment failure or complications related to en…	1	3	9	Based on the provided case, the differential diagnosis for the underlying cause of the patient's presentation, listed in order of likelihood, includes: Infective endocarditis (IE) - This is the most likely explanation, given the history of dental procedure, positive MSSA blood cultures, TEE findings of mitral valve vegetation, mitral regurgitation, and subsequent valve perforation. The patient's …	1	4	6	1. Infective endocarditis: Given the patient's history of methicillin-sensitive Staphylococcus aureus (MSSA) bacteremia, mitral valve vegetation, mitral valve perforation, and recent dyspnea, fatigue, and lower extremity edema, this is the most likely diagnosis to explain the presentation. 2. Heart failure: The patient's symptoms, including dyspnea, fatigue, edema, and weight gain, along with ele…	1	5	10	1. Infective endocarditis: The presence of methicillin-sensitive Staphylococcus aureus in blood cultures, 7-mm vegetation on the mitral valve, and symptoms such as anorexia, fatigue, and edema support this diagnosis. The patient's history of tooth extraction could be the source for the infection. 2. Heart failure: The patient has a history of atrial fibrillation, and the presentation includes fat…	1	4	10		0.0001	Eosinophilic myocarditis and drug reaction with eosinophilia and systemic symptoms (DRESS).	11	https://www.ncbi.nlm.nih.gov/pmc/articles/PMC5486066/
Case 33-2022	An 11-year-old girl was evaluated in the rheumatology clinic of this hospital because of redness of the eyes. The patient had been well until 8 weeks before the current evaluation, when she noticed mild eye redness, which was worse in the right eye than in the left eye. There was intermittent swelling of the eyelids but no photophobia, itching, pain, tearing, or discharge. The patient‚Äôs parents…	Differential Diagnosis Dr. Ezra M. Cohen: This 11-year-old girl presented with redness of the eyes and diffuse lymphadenopathy identified on CT, in the absence of other reported systemic symptoms. Other clinically significant features of her presentation include a positive interferon-Œ≥ release assay 6 months earlier, an intermittently low platelet count and lymphopenia, an intermittently elevate…	Sarcoidosis.	Please read the following case, and provide a thorough and specific list of differential diagnosis for the underlying cause of this presentation. Please list the diagnosis that most explains all the features of the presentation first, and include rare diagnoses if they are the best explanation for the presentation. "An 11-year-old girl was evaluated in the rheumatology clinic of this hospital bec…	Differential Diagnosis: - Tuberculosis uveitis (most likely) - Sarcoidosis - Beh√ßet‚Äôs syndrome - Syphilis - Lyme disease - Vogt-Koyanagi-Harada syndrome (rare) Explanation: The patient‚Äôs presentation is most consistent with tuberculosis uveitis given her positive interferon-Œ≥ release assay for M. tuberculosis, hilar fullness on chest radiography, and response to empirical treatment with a r…	1	2	6	Based on the provided information, here is a list of differential diagnoses for the underlying cause of this presentation: Systemic lupus erythematosus (SLE) Idiopathic intermediate uveitis Tuberculosis (TB) Sarcoidosis Behçet's disease Vogt-Koyanagi-Harada syndrome Wegener's granulomatosis Lymphoma Toxocariasis	1	4	9	1. Tuberculosis uveitis with optic neuritis 2. Sarcoidosis uveitis with optic neuropathy 3. Syphilis uveitis with optic neuropathy 4. Bechet's syndrome 5. Idiopathic intermediate uveitis with optic disc swelling and peripheral retinal hemorrhages.	1	2	5	Based on the given information, the differential diagnosis for the underlying cause of this presentation could include: Tuberculosis uveitis: The presence of anterior chamber cells, keratic precipitates, posterior synechiae, iris nodules, vitreous cells, optic disc swelling, and peripheral retinal hemorrhages are all findings consistent with uveitis. The CT scans revealing diffuse lymphadenopathy…	1	2	9	Based on the case presentation, the following differential diagnoses should be considered, starting with the most likely explanation for the presentation: Tuberculous uveitis: The patient's history of a positive interferon-gamma release assay for Mycobacterium tuberculosis, emigration from West Africa, and presence of hilar fullness on chest radiography, along with the ocular findings of uveitis,…	1	2	7	Tuberculous uveitis: The patient's history of a positive interferon-gamma release assay for Mycobacterium tuberculosis, presence of hilar fullness on chest radiography, and diffuse lymphadenopathy on CT scan support this diagnosis. The ocular findings of uveitis with keratic precipitates, white cells in the anterior chamber, posterior synechiae, and optic disk swelling also point to tuberculous u…	1	2	7	1. Tuberculous uveitis: This diagnosis is most likely given the patient's history of a positive interferon-gamma release assay for M. tuberculosis, persistent uveitis, optic disc swelling, and retinal hemorrhages despite treatment. The patient also has hilar fullness on chest radiography and diffuse lymphadenopathy, which can be associated with tuberculosis. 2. Sarcoidosis: This diagnosis should …	1	2	9	1. Uveitis secondary to tuberculosis (TB), given the positive interferon-gamma release assay for M. tuberculosis, hilar fullness in chest radiography, and diffuse lymphadenopathy in the patient. 2. Preseptal cellulitis, which was considered initially and treated with oral antibiotics, but the persistent eye redness less likely suggests this diagnosis. 3. Sarcoidosis, as the presence of mediastina…	1	3	8		0.0001	Sarcoidosis.	34209	https://onlinelibrary.wiley.com/doi/full/10.1111/joim.13629
Case 34-2022	A 57-year-old woman with major depressive disorder and coronavirus disease 2019 (Covid-19) was evaluated at a hospital affiliated with this hospital because she was having delusions that she was dead. The patient had been in her usual state of health until 2 weeks before this presentation, when myalgias, cough, sore throat, nausea, and vomiting developed. She sought evaluation at the primary care…	Differential Diagnosis Dr. Gregory L. Fricchione: In this 57-year-old woman with metabolic syndrome and a mixed affective disorder suggestive of bipolar disorder, neuropsychiatric symptoms developed 2 weeks after the onset of Covid-19. The patient had psychomotor agitation, a flat affect, and anxious perseveration that was focused on her father‚Äôs care. Three days later, she was noted to become …	Cotard's syndrome	Please read the following case, and provide a thorough and specific list of differential diagnosis for the underlying cause of this presentation. Please list the diagnosis that most explains all the features of the presentation first, and include rare diagnoses if they are the best explanation for the presentation. "A 57-year-old woman with major depressive disorder and coronavirus disease 2019 (…	1. Major Depressive Disorder with psychotic features 2. Delirium 3. Substance-induced psychotic disorder 4. Mood disorder due to a general medical condition 5. Neurocognitive disorder due to COVID-19 6. Catatonia 7. Brief psychotic disorder 8. Schizophrenia or Schizoaffective disorder 9. Other medical conditions causing confusion, such as electrolyte imbalances, vitamin deficiencies, or sepsis. 1…	0		15	The patient presents with delusions that she is dead, which started after the worsening of her Covid-19 pneumonia. Therefore, the differential diagnosis would include: Psychiatric disorders: Major depressive disorder with psychotic features Bipolar disorder with psychotic features Schizophrenia Delusional disorder Brief psychotic disorder Neurological disorders: Delirium Encephalopathy Dementia M…	0		11	Differential Diagnosis: 1. Psychotic depression 2. Major depressive disorder with psychotic features 3. Delirium due to Covid-19, medications or metabolic abnormalities 4. Substance induced psychotic disorder 5. Bipolar disorder with psychotic features 6. Dementia with psychotic features 7. Schizophrenia spectrum disorders 8. Neurodegenerative disorders (ex. Parkinson's disease with dementia) 9. …	0		10	Based on the given case, the following are the differential diagnoses for the underlying cause of the presentation: Delirium: The patient's confusion, anxiety, and disorientation suggest delirium, which can occur as a result of Covid-19 or its treatment. Psychosis: The patient's delusions and flat affect suggest psychosis, which may be related to her major depressive disorder, history of psychiat…		0	7	Based on the case presented, here is a list of differential diagnoses for the underlying cause of this patient's presentation, ordered by likelihood: Cotard's syndrome (Cotard's delusion): This rare neuropsychiatric condition is characterized by delusions of being dead or non-existent, and can be associated with major depressive disorder or other psychiatric disorders. The patient's history of ma…	1	1	9	Based on the case presentation, the following differential diagnoses should be considered: Cotard's Syndrome: The patient presents with delusions of being dead and the belief that others around her are dead, as well as anxiety and depressive symptoms. Cotard's Syndrome, also known as "walking corpse syndrome," is a rare neuropsychiatric condition characterized by nihilistic delusions, often assoc…	1	1	6	1. Cotard's Syndrome (also known as Cotard's delusion or Walking Corpse Syndrome): The patient's belief that she is dead and her symptoms of depression, anxiety, and catatonia-like features are consistent with Cotard's Syndrome. This rare condition has been associated with mood disorders, particularly major depressive disorder, which the patient has a history of. 2. Steroid-induced psychosis: The…	1	1	7	1. Cotard Syndrome (Cotard's Delusion or Walking Corpse Syndrome): This is the most likely diagnosis given the patient's delusions of being dead, her anxiety, depressive symptoms and underlying history of major depressive disorder and COVID-19 infection. 2. Catatonia: Considering the patient's psychiatric history of major depressive disorder, mixed bipolar episode, and COVID-19 infection, a possi…	1	1	8		0.0001	Cotard's syndrome	195	https://www.elsevier.es/en-revista-revista-colombiana-psiquiatria-english-edition--479-articulo-cotards-syndrome-description-two-cases--S253031202200039X
Case 36-2022	A 30-year-old woman was evaluated in the neuro-ophthalmology clinic at a hospital affiliated with this hospital because of monocular vision loss. Two months before the current presentation, during the third trimester of the patient‚Äôs first pregnancy, headache and decreased vision in the right eye developed. The patient thought that the headache felt like previous migraines, which had been infre…	Differential Diagnosis Dr. Michael Levy: This young woman presented with subacute vision loss. The first step in the evaluation of this patient is to localize the problem to the eye, the optic nerve, or the brain. The patient was first evaluated by an eye specialist, who examined the eye for conditions that can lead to monocular vision loss.1 When examination of the eye did not identify a cause o…	Meningioma, meningothelial type, World Health Organization grade 1.	Please read the following case, and provide a thorough and specific list of differential diagnosis for the underlying cause of this presentation. Please list the diagnosis that most explains all the features of the presentation first, and include rare diagnoses if they are the best explanation for the presentation. "A 30-year-old woman was evaluated in the neuro-ophthalmology clinic at a hospital…	1. Neuromyelitis optica spectrum disorder (NMOSD) 2. Multiple sclerosis (MS) 3. Autoimmune optic neuritis/chronic relapsing inflammatory optic neuropathy 4. Idiopathic intracranial hypertension 5. Sarcoidosis 6. Syphilis (neurosyphilis) 7. Central retinal artery or vein occlusion 8. Leber hereditary optic neuropathy 9. Radiation optic neuropathy 10. Anterior ischemic optic neuropathy Rare diagnos…	1	11	16	Differential Diagnosis for Monocular Vision Loss with Swollen Optic Disk and Temporal Pallor: Optic Neuritis: Optic neuritis is an inflammation of the optic nerve and is the most common cause of monocular vision loss in young adults. It is often associated with multiple sclerosis but can also occur as an isolated event. The patient has some features consistent with optic neuritis, such as decreas…	1	5	10	1. Idiopathic intracranial hypertension 2. Neuromyelitis Optica Spectrum Disorder (NMOSD) 3. Multiple Sclerosis 4. Optic Neuritis 5. Leber‚Äôs Hereditary Optic Neuropathy (LHON) 6. Ischemic Optic Neuropathy 7. Neurosarcoidosis 8. Tolosa-Hunt Syndrome 9. Invasive Sinus Aspergillosis 10. Chronic Lymphocytic Inflammation with Pontine Perivascular Enhancement Responsive to Steroids (CLIPPERS) The mos…	0		10	Differential diagnosis for monocular vision loss in a 30-year-old woman: Optic neuritis: This is the most likely diagnosis given the clinical presentation of decreased vision, soreness in the eye, optic disc swelling, and increased thickness of the retinal nerve fiber layer. The optic nerve involvement could be associated with multiple sclerosis, neuromyelitis optica, or other autoimmune diseases…	0		10	Based on the patient's presentation and clinical findings, here is a list of possible differential diagnoses, ordered from the most likely to the least likely: Optic neuritis (atypical) - The presentation of unilateral vision loss, optic disc swelling, and history of headaches are consistent with optic neuritis. However, negative aquaporin-4 and MOG antibody tests and lack of significant improvem…	1	2	8	Atypical Optic Neuritis: The patient's presentation of monocular vision loss, optic disc swelling, and poor response to steroid treatment are consistent with atypical optic neuritis. The negative test results for aquaporin-4 and MOG antibodies also support this diagnosis. Neuromyelitis Optica Spectrum Disorder (NMOSD): Although the patient tested negative for aquaporin-4 antibodies, NMOSD could s…	1	7	10	1. Atypical optic neuritis (most likely given MRI findings, pregnancy, and symptoms) 2. Orbital inflammatory disease (e.g., idiopathic orbital inflammation, sarcoidosis) 3. Optic nerve sheath meningioma 4. Optic nerve glioma 5. Leber's hereditary optic neuropathy 6. Ischemic optic neuropathy (e.g., anterior ischemic optic neuropathy, posterior ischemic optic neuropathy) 7. Lyme disease-related op…	1	3	14	1. Atypical optic neuritis 2. Neuromyelitis optica spectrum disorder 3. Multiple sclerosis 4. Orbital inflammation/sclerosing orbital pseudotumor 5. Orbital inflammatory syndrome 6. Optic nerve glioma 7. Optic nerve sheath meningioma 8. Inflammatory optic neuropathy 9. Infectious optic neuritis (e.g., Lyme disease, syphilis) 10. Leber's hereditary optic neuropathy 11. Ischemic optic neuropathy 12…	1	7	19		0.001	Optic Nerve Sheath Meningioma	421	https://www.frontiersin.org/journals/oncology/articles/10.3389/fonc.2023.1157182/full
Case 37-2022	A 55-year-old man was admitted to this hospital 7 months after kidney transplantation because of fatigue, weight loss, and new pulmonary nodules. The patient had been in his usual state of health until 1 week before this admission, when severe fatigue and generalized weakness developed. He had lost 4.5 kg in the past month after making healthier dietary choices; however, he had also noticed abdom…	Differential Diagnosis Dr. Matthew B. Roberts: This 55-year-old man with a history of sarcoidosis and end-stage kidney disease, for which he underwent kidney transplantation, presented with a progressive and fulminant clinical syndrome that is notable for fever, pulmonary nodules, splenomegaly, and hypercalcemia ‚Äî findings that will form the basis of my differential diagnosis. Because this pati…	Disseminated Mycobacterium tuberculosis infection.	Please read the following case, and provide a thorough and specific list of differential diagnosis for the underlying cause of this presentation. Please list the diagnosis that most explains all the features of the presentation first, and include rare diagnoses if they are the best explanation for the presentation. "A 55-year-old man was admitted to this hospital 7 months after kidney transplanta…	1. Disseminated infection: The presence of new pulmonary nodules and lymphadenopathy on CT scan suggest a hematogenous spread of an infectious agent. Differential diagnoses could include disseminated bacterial, fungal, mycobacterial, or viral infections. 2. Reactivation of EBV: The patient had previously tested positive for EBV IgG, and reactivation could be a potential cause of the patient‚Äôs s…	1	3	9	Differential Diagnosis: Infectious causes such as: Epstein-Barr virus (EBV) or cytomegalovirus (CMV) reactivation or infection Mycobacterium tuberculosis Bacterial pneumonia Fungal pneumonia Graft rejection or dysfunction Acute or chronic rejection of the transplanted kidney Vascular disease of donor origin Recurrent glomerulonephritis Sarcoidosis progression or recurrence Drug toxicity or side e…	1	2	16	Differential Diagnosis: 1. Disseminated candiasis 2. Bacterial sepsis ‚Äì septicemia 3. Fungal infections ‚Äì aspergillosis, histoplasmosis, pneumocystis jiroveci pneumonia 4. Viral infections ‚Äì CMV, EBV, COVID-19, RSV, influenza 5. Tuberculosis 6. Sarcoidosis progression 7. Metastatic neoplasm 8. New lymphoproliferative disorder 9. Granulomatosis with Polyangiitis 10. Pulmonary hemorrhage / va…	1	5	10	Differential diagnosis for a 55-year-old man with fatigue, weight loss, pulmonary nodules, and kidney transplant: Post-transplant lymphoproliferative disorder (PTLD) - most common cause of new pulmonary nodules in transplant recipients. Symptoms include fatigue, weight loss, and dysphagia. EBV is a risk factor for PTLD. CMV infection - may cause weight loss, fatigue, and abdominal discomfort. CMV…	1	3	12	Based on the provided case, the following is a list of differential diagnoses in order of likelihood: Infection related to immunosuppression after kidney transplantation, such as: a. Pulmonary infection (e.g., bacterial pneumonia, fungal pneumonia, or viral pneumonia like cytomegalovirus (CMV) or Epstein-Barr virus (EBV)). b. Tuberculosis (TB), despite a negative interferon-γ release assay. c. At…	1	4	14	Based on the provided case, here is a list of differential diagnoses for the underlying cause of this presentation, starting with the most likely explanation: Post-transplant infection: This patient's presentation of fatigue, weight loss, pulmonary nodules, and worsening renal function after kidney transplantation raises the suspicion of an infectious complication. The patient is at increased ris…	1	8	9	1. Infectious complications due to immunosuppression: Considering the patient's recent kidney transplantation and immunosuppressive therapy, an infection could explain the symptoms, pulmonary nodules, and laboratory abnormalities. Possibilities include bacterial (e.g., nocardiosis, mycobacterium), viral (e.g., CMV, EBV), or fungal (e.g., aspergillosis, histoplasmosis) infections. 2. Kidney transp…	1	1	8	1. Post-transplantation infection: Given the patient's recent kidney transplant and immunosuppressive therapy, there is a high risk for developing infections. The presentation of fatigue, weight loss, pulmonary nodules, fever, and elevated lactic acid levels could support an infectious etiology such as bacterial, viral, or fungal infection. 2. Sarcoidosis flare: The patient has a history of sarco…	1	11	12		1e-05	Disseminated Mycobacterium tuberculosis infection.	5988	https://www.ncbi.nlm.nih.gov/pmc/articles/PMC10397472/ https://www.cdc.gov/tb/statistics/default.htm
Case 38-2022	A 21-year-old woman was evaluated at this hospital because of fatigue, weight gain, and abdominal pain. The patient had been well until 4 months before the current evaluation, when an episode of dull, aching pain in the right lower quadrant occurred. The pain lasted for a few hours before resolving spontaneously. During the next 4 months, episodes of abdominal pain continued to occur and increase…	Differential Diagnosis Dr. Allison Kimball: I participated in the care of this patient and am aware of the final diagnosis. When I initially evaluated this patient in the endocrinology clinic, there were two key questions to address. First, was the adrenal mass benign or cancerous? Second, was the lesion hormone-secreting? ADRENAL MASS The differential diagnosis for the adrenal mass in this patie…	Adrenocortical carcinoma	Please read the following case, and provide a thorough and specific list of differential diagnosis for the underlying cause of this presentation. Please list the diagnosis that most explains all the features of the presentation first, and include rare diagnoses if they are the best explanation for the presentation. "A 21-year-old woman was evaluated at this hospital because of fatigue, weight gai…	1. Adrenal adenoma 2. Adrenocortical carcinoma 3. Pheochromocytoma 4. Metastatic tumor (to adrenal gland) 5. Cushing syndrome 6. Hypothyroidism 7. Irritable bowel syndrome 8. Anxiety disorder 9. Migraine 10. Hernia 11. Endometriosis 12. Ovarian cyst or torsion 13. Appendicitis 14. Inflammatory bowel disease 15. Pancreatitis 16. Gallbladder disease 17. Pelvic inflammatory disease 18. Endometritis …	1	2	24	Differential Diagnosis for the underlying cause of this presentation: Cushing's Syndrome: This is the most likely diagnosis given the patient's symptoms, history of hypothyroidism, and the presence of a right adrenal mass. Cushing's Syndrome is caused by prolonged exposure to excess cortisol, leading to symptoms such as fatigue, weight gain, abdominal pain, and hypertension. Imaging studies revea…	1	3	9	1. Adrenocortical carcinoma 2. Pheochromocytoma 3. Adrenal adenoma 4. Metastasis to adrenal gland 5. Gastrointestinal stromal tumor (GIST) with liver metastasis 6. Leiomyoma or leiomyosarcoma of uterus with liver metastasis 7. Primary hepatic tumor with adrenal metastasis 8. Lymphoma with adrenal and lung involvement 9. Sarcoidosis with adrenal involvement 10. Tuberculosis with adrenal involvemen…	1	1	12	Differential Diagnosis: Adrenal Adenoma Adrenocortical Carcinoma Pheochromocytoma Cushing's syndrome Hypothyroidism Irritable bowel syndrome Endometriosis Pelvic Inflammatory Disease (PID) Ovarian Torsion Fibroids Ovarian Cysts Appendicitis Inflammatory bowel disease Functional abdominal pain syndrome Pancreatitis Gastroesophageal reflux disease (GERD) Peptic ulcer disease Gastric cancer Colon ca…	1	2	21	Adrenal adenoma: The patient's imaging studies showed an adrenal mass with an absolute washout of 71%, which is highly suggestive of an adrenal adenoma. However, given that the lesion is larger than 4 cm, malignancy cannot be ruled out. The patient's fatigue, weight gain, and abdominal pain could be explained by hormonal imbalances caused by the adrenal mass. Adrenocortical carcinoma: The size of…	1	2	8	Based on the provided case, the following is a list of differential diagnoses for the underlying cause of this presentation, with the most likely diagnosis first: Adrenocortical carcinoma: The right adrenal mass with indeterminate features on MRI and CT, as well as the size of the lesion (larger than 4 cm), suggests a malignant adrenal lesion despite the high absolute washout percentage. The elev…	1	1	8	1. Adrenal adenoma: The adrenal mass and imaging characteristics with an absolute washout of more than 60% in the CT scan could suggest an adrenal adenoma, which may explain the fatigue, weight gain, and abdominal pain. 2. Pheochromocytoma: The indeterminate features of the adrenal mass on MRI cannot definitively rule out a pheochromocytoma, another type of adrenal lesion that may present with si…	1	3	9	1. Adrenal adenoma: The imaging findings and washout characteristics are highly suggestive of an adrenal adenoma, although the size of the mass is a concern for malignancy. The normal renin, aldosterone, catecholamines, and metanephrines levels suggest a non-functional adenoma. However, the results of the dexamethasone suppression test indicate cortisol hypersecretion. 2. Adrenocortical carcinoma…	1	2	7		1e-06	Adrenocortical carcinoma	4582	https://www.ncbi.nlm.nih.gov/pmc/articles/PMC3963263/
Case 39-2022	A 31-year-old woman was admitted to this hospital 15 days after the birth of her first child because of abdominal pain and fever. The patient had received routine prenatal care at this hospital. Serologic screening during the pregnancy showed immunity to rubella. Rectovaginal culture was positive for group B streptococcus. Tests for syphilis, hepatitis B virus surface antigen, gonorrhea, chlamydi…	Differential Diagnosis after Abdominal Imaging Dr. Little: Liver complications that are specific to pregnancy include preeclampsia with severe features, HELLP (hemolysis, elevated liver-enzyme levels, and low platelet count) syndrome, and acute fatty liver of pregnancy. HELLP SYNDROME HELLP syndrome can be complicated by formation of a subcapsular hematoma, although such an event is rare (<1% of …	Hepatic adenoma.	Please read the following case, and provide a thorough and specific list of differential diagnosis for the underlying cause of this presentation. Please list the diagnosis that most explains all the features of the presentation first, and include rare diagnoses if they are the best explanation for the presentation. "A 31-year-old woman was admitted to this hospital 15 days after the birth of her …	1. Subcapsular hematoma of the liver 2. Hepatic adenoma 3. Hepatocellular carcinoma 4. Hepatic abscess 5. Pyelonephritis with renal hematoma or abscess 6. Splenic hematoma or infarction 7. Pancreatitis with pseudocyst formation 8. Ruptured ovarian cyst 9. Deep vein thrombosis or pulmonary embolism 10. Acute cholecystitis with gallbladder perforation 11. Appendicitis with perforation 12. Colonic d…	1	2	18	Based on the presentation provided, the following is a list of differential diagnoses: Endometritis Pyelonephritis Septicemia Chorioamnionitis Subcapsular liver hematoma HELLP syndrome Disseminated intravascular coagulation (DIC) Torsion of ovarian cyst Hepatitis Gallbladder disease Acute fatty liver of pregnancy Pre-eclampsia/eclampsia	0		12	Differential Diagnosis: 1. Hepatic hematoma 2. Liver abscess 3. Hepatic adenoma 4. Hepatocellular carcinoma 5. Cholangiocarcinoma 6. Hemangioma 7. Focal nodular hyperplasia 8. Edematous pancreatitis 9. Splenic infarction 10. Splenic hematoma 11. Spleen rupture 12. Pancreatic abscess 13. Pyelonephritis 14. Ovarian vein thrombosis 15. Renal artery aneurysm Most likely diagnosis: Hepatic hematoma	1	3	15	Possible differential diagnosis for this case includes: Endometritis: Inflammation of the endometrium can occur after childbirth and can cause abdominal pain and fever. The positive urine culture for group B streptococcus may suggest an ascending infection from the lower urinary tract. Risk factors include prolonged labor, prolonged rupture of membranes, and cesarean delivery. Septicemia: Bactere…	0		8	Postpartum pyelonephritis: The patient's symptoms of abdominal pain, fever, and the presence of group B streptococcus in her urine culture suggest pyelonephritis. The patient has already been treated with antibiotics for this, but her symptoms have persisted. Hepatic hematoma: The presence of a large exophytic, heterogeneous lesion in the left lobe of the liver, as seen on ultrasound and CT, is c…	0		7	Based on the clinical presentation, the following differential diagnoses can be considered, starting with the most likely explanation for the symptoms: Hepatic hematoma: The ultrasound and CT findings of a large exophytic, heterogeneous lesion in the left lobe of the liver containing spontaneously hyperdense material that does not enhance after the administration of contrast material, are consist…	0		6	1. Postpartum pyelonephritis caused by group B streptococcus 2. Hematoma within the hepatic mass 3. Necrosis within the hepatic mass 4. Uterine atony leading to postpartum hemorrhage 5. Hepatic adenoma or focal nodular hyperplasia (related to oral contraceptive use) 6. Hepatic abscess 7. Ruptured ovarian cyst 8. Nephrolithiasis 9. Cholecystitis 10. Puerperal infection (e.g. endometritis or parame…	1	5	10	1. Pyogenic liver abscess secondary to Group B streptococcus infection: The symptoms of this patient, including fever, abdominal pain, and positive blood and urine cultures for Group B streptococcus, suggest a possible pyogenic liver abscess as the primary cause of her presentation. This would also explain the elevation in her liver enzymes (ALT, AST, and alkaline phosphatase levels) and the imag…	0		5		1e-06	Hepatic adenoma.	4941	https://www.ncbi.nlm.nih.gov/pmc/articles/PMC4635146/
Case 4-2022	A 55-year-old man was evaluated in the rheumatology clinic of this hospital because of bilateral hearing loss and eye redness. The patient had been in his usual state of health until 8 weeks before the current evaluation, when a headache involving the left temple developed. A similar headache had occurred during an episode of shingles 15 years earlier. He received a prescription for a 1-week cour…	Differential Diagnosis Figure 2. Salient Features of This Patient‚Äôs Presentation. Dr. Jeffrey P. Harris: This 55-year-old man presented with progressive hearing loss, imbalance, and ocular inflammation. A headache involving the left temple had occurred 8 weeks earlier. These symptoms were superimposed on a 6-month history of weight loss, a 2-month history of body aches and fatigue, and the occu…	Neurosyphilis.	Please read the following case, and provide a thorough and specific list of differential diagnosis for the underlying cause of this presentation. Please list the diagnosis that most explains all the features of the presentation first, and include rare diagnoses if they are the best explanation for the presentation. "A 55-year-old man was evaluated in the rheumatology clinic of this hospital becau…	1. Granulomatosis with polyangiitis (Wegener's) 2. Sarcoidosis 3. Cogan's syndrome 4. Multiple sclerosis 5. Lyme disease 6. Syphilis 7. Tuberculosis 8. HIV infections 9. Behcet's disease 10. Temporal arteritis 11. Inflammatory bowel disease-associated arthritis 12. Ankylosing spondylitis 13. Psoriatic arthritis 14. Reactive arthritis (Reiter's syndrome) 15. Systemic lupus erythematosus (SLE) 16. …	1	6	18	1. Wegener's granulomatosis (granulomatosis with polyangiitis) - a rare vasculitis that can affect multiple organs, including the ears, eyes, and respiratory system. It can cause bilateral hearing loss, eye redness, and sinusitis-like symptoms. The positive ANCA (anti-neutrophil cytoplasmic antibody) test is highly suggestive of Wegener's granulomatosis. 2. Sarcoidosis - a multisystem disorder ch…	0		11	1. Granulomatosis with polyangiitis: This rare autoimmune disorder affects blood vessels and can cause inflammation and damage to various organs including the ears, sinuses, lungs, and kidneys. Symptoms may include ear and eye problems, hearing loss, tinnitus, and weight loss. 2. Beh√ßet's disease: This rare disorder causes inflammation in blood vessels throughout the body and often affects the e…	1	6	10	1. Sarcoidosis: A chronic autoimmune disorder that can present with a variety of symptoms including bilateral hilar lymphadenopathy, pulmonary infiltrates, skin lesions, and ocular involvement. Sarcoidosis can also affect the auditory and vestibular systems, resulting in sensorineural hearing loss, tinnitus, and vertigo. Elevated erythrocyte sedimentation rate and C-reactive protein levels can be…	1	7	9	The following is a list of differential diagnoses for the patient's presentation, starting with the most likely explanation for the symptoms: Cogan's syndrome: This autoimmune disease is characterized by nonsyphilitic interstitial keratitis, sensorineural hearing loss, and vertigo. It explains the patient's hearing loss, eye redness, imbalance, and anterior uveitis. Granulomatosis with polyangiit…	1	5	6	Based on the provided case, here is a list of differential diagnoses for the underlying cause of the patient's presentation, ordered from the most likely to less likely: Cogan's syndrome: This autoimmune disease is characterized by nonsyphilitic interstitial keratitis, eye inflammation (uveitis), and hearing loss. The patient's symptoms of bilateral hearing loss, eye redness, anterior uveitis, an…	1	6	8	1. Cogan's syndrome: This autoimmune disease often presents with sudden, bilateral sensorineural hearing loss, interstitial keratitis causing red eyes, and vestibular symptoms such as dizziness or imbalance. Considering the patient's symptoms, history of inflammation/autoimmunity (allergic rhinitis, asthma, irritable bowel syndrome), and laboratory results showing elevated ESR and CRP, this diagn…	0		9	1. Cogan's syndrome: This autoimmune disorder is characterized by eye inflammation (uveitis, interstitial keratitis), hearing loss, and vestibular dysfunction, which matches the patient's presentation of eye redness, bilateral hearing loss, and vestibular hypofunction. 2. Granulomatosis with polyangiitis (Wegener's): This systemic vasculitis affects small and medium-sized vessels, and can involve…	0		8		3e-05	Neurosyphilis.	4757	https://www.ncbi.nlm.nih.gov/pmc/articles/PMC5763486/
Case 4-2023	A 56-year-old man with a history of alcohol and opioid use was evaluated in the gastroenterology clinic of this hospital because of abnormal results on liver testing. Three years before the current presentation, the patient had elevated levels of alanine aminotransferase, aspartate aminotransferase, and alkaline phosphatase on routine testing performed by his primary care physician. At that time,…	Differential Diagnosis Dr. Irun Bhan: This 56-year-old man presented for an outpatient evaluation in the gastroenterology clinic because of abnormal results on liver testing. He reported a history of prolonged daily alcohol consumption, and he had previously reported a positive test for HCV antibodies. Results of laboratory tests for liver function had been abnormal for at least 3 years, as evide…	Primary biliary cholangitis with portopulmonary hypertension.	Please read the following case, and provide a thorough and specific list of differential diagnosis for the underlying cause of this presentation. Please list the diagnosis that most explains all the features of the presentation first, and include rare diagnoses if they are the best explanation for the presentation. "A 56-year-old man with a history of alcohol and opioid use was evaluated in the g…	1. Primary Biliary Cholangitis (PBC) 2. Hepatitis C 3. Alcoholic liver disease 4. Non-alcoholic fatty liver disease (NAFLD) 5. Autoimmune hepatitis 6. Hemochromatosis 7. Wilson's disease 8. Acute hepatitis (toxic, viral or drug-induced) 9. Infiltrative liver disease (lymphoma, sarcoidosis) 10. Portal vein thrombosis (as a consequence of liver disease) 11. Cirrhosis (as a consequence of any of the…	1	1	13	Based on the information provided, the following are the differential diagnoses for the underlying cause of this presentation: Alcoholic liver disease: The patient's history of alcohol use and elevated liver enzymes may suggest liver damage caused by chronic alcohol use. Hepatitis C: The patient had a positive test for HCV antibodies in the past, and while the HCV RNA level was undetectable, it i…	0		12	1. Primary biliary cholangitis (PBC) 2. Liver cirrhosis (alcohol-related, viral, autoimmune) 3. Hepatic encephalopathy 4. Portal vein thrombosis (with or without underlying liver disease) 5. Hepatocellular carcinoma (HCC) 6. Hemophagocytic lymphohistiocytosis (HLH) 7. Systemic lupus erythematosus (SLE) 8. Rheumatoid arthritis (RA) 9. Lyme disease (late-stage) 10. Granulomatosis with polyangiitis …	1	1	13	Differential Diagnosis for a 56-year-old man with abnormal liver testing, pancytopenia, joint pain, rash, esophageal varices, and hepatic encephalopathy: Cirrhosis: This is the most likely diagnosis given the patient's history of alcohol and opioid abuse, and the presence of spider angiomas, esophageal varices, splenomegaly, and elevated FibroTest score indicating liver fibrosis. Additionally, th…	1	14	16	Differential diagnoses for this case, ordered from the most likely to the least likely, include: Cirrhosis due to alcohol use and hepatitis C: The patient has a history of alcohol use and positive HCV antibody test, along with liver test abnormalities, nodular hepatic contour on MRCP, and esophageal varices on esophagogastroduodenoscopy. Additionally, the FibroTest score suggests severe liver fib…	0		7	Based on the clinical presentation and laboratory findings, the following differential diagnoses are listed in order of relevance: Cirrhosis secondary to alcohol and hepatitis C: The patient's history of alcohol and opioid use, elevated liver enzymes, nodular hepatic contour on MRCP, splenomegaly, portal vein thrombosis, esophageal varices, and hepatic encephalopathy all support this diagnosis. P…	1	2	7	1. Liver cirrhosis (most likely due to alcohol consumption and history of elevated liver enzymes) 2. Hepatic encephalopathy (associated with liver cirrhosis, confusion, and elevated ammonia levels) 3. Chronic hepatitis C infection (positive HCV antibodies, though undetectable HCV RNA level) 4. Autoimmune hepatitis (presence of antimitochondrial antibodies) 5. Primary biliary cholangitis (positive…	1	5	16	1. Cirrhosis due to alcohol use disorder: This diagnosis best explains the symptoms and history presented, with liver testing abnormalities, splenomegaly, portal vein thrombosis with cavernous transformation, esophageal varices, and hepatic encephalopathy. The patient also reported history of alcohol consumption for about 30 years. 2. Hepatitis C virus infection: The patient has a past positive t…	1	3	10		1e-05	Primary biliary cholangitis	18254	https://www.ncbi.nlm.nih.gov/pmc/articles/PMC10241503/
Case 40-2022	A 38-year-old man was evaluated at the cardiology clinic of this hospital because of exertional chest discomfort. The patient had been a competitive athlete in the past and had remained an avid runner. Approximately 15 years before the current evaluation, while he was running, he had episodes of flushing with diffuse cutaneous swelling involving the face, lips, hands, and trunk, along with hives …	Differential Diagnosis Dr. Guseh: I participated in the care of this patient, and I am aware of the final diagnosis. This 38-year-old man, who was physically active and fit, presented with episodic exertional chest discomfort that had occurred spontaneously throughout several months. The discomfort increased with exertion and decreased with rest; it typically developed soon after he started exerc…	Cardiac paraganglioma with a germline mutation in the gene encoding succinate dehydrogenase subunit C (SDHC).	Please read the following case, and provide a thorough and specific list of differential diagnosis for the underlying cause of this presentation. Please list the diagnosis that most explains all the features of the presentation first, and include rare diagnoses if they are the best explanation for the presentation. "A 38-year-old man was evaluated at the cardiology clinic of this hospital because…	Differential diagnosis for the underlying cause of this presentation includes: 1. Cardiac paraganglioma: This is the most likely diagnosis given the patient's clinical presentation and imaging findings. 2. Cardiac hemangioma: This is a rare differential diagnosis, but cannot be excluded based on the imaging findings. 3. Cardiac myxoma: This is a rare differential diagnosis that could explain the …	1	1	7	Differential Diagnosis for Exertional Chest Discomfort Coronary artery disease (CAD) Aortic stenosis Hypertrophic cardiomyopathy Arrhythmogenic right ventricular cardiomyopathy (ARVC) Myocarditis Pericarditis Pulmonary embolism Mitral valve prolapse Exercise-induced bronchoconstriction (EIB) Anaphylaxis (food-related exercise-induced) Gastrointestinal (GI) disorders (e.g., esophageal spasm, gastr…	0		13	Differential Diagnosis: 1. Cardiac paraganglioma 2. Hemangioma 3. Other cardiac tumors (rare) 4. Coronary artery disease 5. Coronary steal syndrome 6. Arrhythmogenic right ventricular dysplasia/cardiomyopathy 7. Acute myocarditis 8. Chronic eosinophilic pneumonia (because of past allergic reactions) 9. Pulmonary embolism (because of chest discomfort and wheezes) 10. Congenital heart disease (beca…	1	1	11	The patient's presentation may be due to a variety of conditions. The following is a list of differential diagnoses that explain the clinical features of the presentation: Coronary artery disease - Chest pain and T-wave abnormalities on ECG suggest myocardial ischemia, which can be caused by obstructive coronary artery disease. Arrhythmogenic right ventricular dysplasia/cardiomyopathy (ARVD/C) - …	0		9	Based on the provided case, the following is a list of differential diagnoses for the underlying cause of this presentation, starting with the diagnosis that most explains all the features: Cardiac paraganglioma: This is supported by the presence of the intrapericardial mass with intense heterogeneous enhancement on CT angiography, nonspecific moderate tracer uptake on 123I-metaiodobenzylguanidin…	1	1	5	Based on the provided case, the following is a list of differential diagnoses for the underlying cause of this patient's presentation, starting with the diagnosis that most explains all the features: Cardiac paraganglioma: The presence of an intrapericardial mass with intense heterogeneous enhancement and involvement of the coronary arteries, coupled with the 'salt and pepper' appearance on T2-we…	1	1	5	1. Food-related exercise-induced anaphylaxis 2. Cardiac arrhythmia (e.g., premature ventricular contractions, sinus bradycardia) 3. Coronary artery disease (e.g., ischemia, atherosclerosis, coronary artery stenosis, anomalous coronary artery origin) 4. Intrapericardial mass a. Paraganglioma b. Hemangioma 5. Vasospastic angina (Prinzmetal's angina) 6. Hypertrophic cardiomyopathy 7. Myocardial isch…	1	5	10	1. Paraganglioma: The intrapericardial mass's heterogenous enhancement on coronary CT angiography and moderate tracer uptake on single-photon emission CT, along with the findings on cardiac MRI suggest the possibility of a paraganglioma. 2. Hemangioma: The mass's features on imaging, including multiple tiny feeding vessels, venous drainage, and high vascularity on first-pass perfusion images, als…	1	1	6		1e-06	Cardiac paraganglioma	1954	https://academic.oup.com/ehjcr/article/8/3/ytae032/7585854
Case 5-2022	A 65-year-old woman was admitted to this hospital because of rapidly progressive weakness in the right arm and recurrent falls. Twelve years before this admission, the patient noted worsening gait and balance disturbance, which slowly progressed, and falls began to occur 5 years before this admission. Her medical history included measles encephalitis, which had been diagnosed when she was 6 years…	Differential Diagnosis Dr. Christopher D. Stephen: I was involved in the care of this patient, and I am aware of the diagnosis in this case. I was the first neurologist to see this patient after a long interval; on examination, it appeared that her longstanding ataxia was generally similar to that seen at her assessment 2 years earlier, albeit having perhaps slightly worsened symptomatically over…	Genetic Creutzfeldt–Jakob disease	Please read the following case, and provide a thorough and specific list of differential diagnosis for the underlying cause of this presentation. Please list the diagnosis that most explains all the features of the presentation first, and include rare diagnoses if they are the best explanation for the presentation. "A 65-year-old woman was admitted to this hospital because of rapidly progressive …	Differential diagnosis for the underlying cause of this presentation: 1. Measles encephalitis sequelae - possible exacerbation 2. Multiple Sclerosis - possible progression or exacerbation 3. Spinocerebellar Ataxia - due to the wide-based gait and appendicular dysmetria 4. Hereditary Ataxia - family history of an intracranial hemorrhage 5. Cerebral Atrophy - due to fatty atrophy seen on MRI 6. Mot…	1	8	14	Progressive supranuclear palsy (PSP) - a neurodegenerative disorder that affects movement, balance, vision, speech, and swallowing. It can cause the symptoms seen in this patient, including gait disturbance, falls, dysarthria, ophthalmoplegia, and dystonia. PSP is usually sporadic and has no known cure. Multiple system atrophy (MSA) - a rare, progressive neurodegenerative disorder that affects th…	1	4	8	1. Measles encephalitis-related neurologic deficits 2. Primary progressive multiple sclerosis 3. Hereditary spastic paraplegia 4. Amyotrophic lateral sclerosis 5. Motor neuron disease 6. Vitamin B12 deficiency 7. Vitamin E deficiency 8. Lyme disease 9. Mononeuritis multiplex 10. Syringomyelia 11. Cervical spondylosis 12. ALS-FTD (Amyotrophic lateral sclerosis-frontotemporal dementia) 13. Metachro…	0		18	1. Progressive Multifocal Leukoencephalopathy (PML): Progressive neurologic symptoms with vision and hearing impairment can be a sign of PML, which is caused by the JC virus. MRI of the brain can be normal or show nonspecific white matter changes, and cerebrospinal fluid (CSF) analysis may show elevated protein levels and/or the presence of JC virus DNA. 2. Spinocerebellar ataxia: Given the patie…	1	9	10	Based on the case presentation, the following differential diagnoses should be considered, starting with the most likely explanations: Creutzfeldt-Jakob disease (CJD): Given the patient's rapidly progressive weakness, ataxia, and history of a family member with CJD, this is an important consideration. The MRI findings of restricted diffusion and hyperintensity on FLAIR imaging in the left frontal…	1	1	7	Based on the provided case, the following differential diagnoses should be considered, ordered by the likelihood of explaining the patient's presentation: Progressive Multifocal Leukoencephalopathy (PML): Given the patient's progressive neurological symptoms, the presence of subcortical white matter changes on MRI, and her immunocompromised state due to emaciation, PML should be considered. Atypi…	1	2	7	1. Creutzfeldt-Jakob disease (CJD): Due to family history of CJD and the patient's progressive neurologic symptoms, this is the most likely cause. MRI findings support the possibility of CJD. 2. Alzheimer's disease: There is a family history of Alzheimer's disease, and the patient presents with progressive neurologic symptoms. However, the rapid progression and specific MRI findings are more cons…	1	1	9	1. Creutzfeldt-Jakob Disease (CJD): The patient's father had been diagnosed with CJD, and her symptoms of progressive weakness, ataxia, and stimulus-induced jerks are consistent with this diagnosis. 2. Subacute combined degeneration of the spinal cord: This could explain the patient's ataxia, weakness, and decreased reflexes, but her family history and imaging findings are more suggestive of CJD.…	1	1	9		1e-06	Genetic Creutzfeldt–Jakob disease	2511	https://www.ncbi.nlm.nih.gov/books/NBK507860/
Case 5-2023	A 67-year-old man was admitted to this hospital because of fever, myalgias, and one previous episode of vomiting. Nine months before this admission, the patient was admitted to another hospital with cough and shortness of breath, and coronavirus disease 2019 (Covid-19) pneumonia was diagnosed. He received remdesivir, dexamethasone, and supplemental oxygen, which was delivered through a high-flow …	Differential Diagnosis Dr. Hemal N. Sampat: This immunosuppressed 67-year-old man with interstitial lung disease presented with high fever, worsening hypoxemia and dyspnea, myalgias, nausea, and vomiting. Subsequently, pancytopenia developed, along with elevation of aminotransferase levels. Each of these presenting signs and symptoms has a potentially broad differential diagnosis, but the combina…	Human granulocytic anaplasmosis.	Please read the following case, and provide a thorough and specific list of differential diagnosis for the underlying cause of this presentation. Please list the diagnosis that most explains all the features of the presentation first, and include rare diagnoses if they are the best explanation for the presentation. "A 67-year-old man was admitted to this hospital because of fever, myalgias, and o…	1. Organizing pneumonia with fibrotic interstitial lung disease 2. Superimposed infection such as bacterial pneumonia or sepsis 3. Recurrent COVID-19 pneumonia or COVID-19-related complications 4. Drug-induced interstitial lung disease (e.g. mycophenolate mofetil) 5. Connective tissue disease-associated interstitial lung disease (e.g. lupus, rheumatoid arthritis) 6. Hypersensitivity pneumonitis d…	0		14	Based on the provided information, the following are possible differential diagnoses for the underlying cause of the presentation, listed in order of likelihood: SARS-CoV-2 reinfection or a breakthrough case - The patient's symptoms of fever, myalgias, and shortness of breath, as well as the recent negative SARS-CoV-2 antigen test, could be explained by a possible SARS-CoV-2 reinfection or a brea…	0		9	1. Interstitial lung disease with organizing pneumonia 2. Complication related to previous Covid-19 infection 3. Fungal infection, such as aspergillosis or histoplasmosis 4. Bacterial pneumonia or sepsis 5. Viral pneumonia, other than Covid-19 6. Pulmonary embolism 7. Lung cancer 8. Idiopathic pulmonary fibrosis 9. Drug reaction or toxicity 10. Connective tissue disease, such as rheumatoid arthri…	0		14	The differential diagnosis for the underlying cause of his presentation includes: Acute exacerbation of interstitial lung disease: The patient has a history of fibrotic interstitial lung disease and organizing pneumonia superimposed on it. The current symptoms may be due to an acute exacerbation of interstitial lung disease. Pneumonia: The patient had Covid-19 pneumonia nine months prior and was …	0		9	Based on the case presentation, here is a list of differential diagnoses for the underlying cause of the patient's presentation, ordered from the most likely to the least likely: Bacterial infection/sepsis: The fever, myalgias, nausea, and vomiting could suggest a systemic bacterial infection. The patient's history of lung disease and immunosuppressive medications may increase the risk of infecti…	1	8	9	Based on the provided information, here is a list of differential diagnoses for the underlying cause of this presentation, ordered from most likely to least likely: Post-acute sequelae of SARS-CoV-2 infection (PASC), also known as "Long COVID" - the patient has a history of COVID-19 pneumonia and has persistent symptoms, including cough, shortness of breath, and dyspnea on exertion. Bacterial pne…	1	8	10	1. Organizing pneumonia superimposed on fibrotic interstitial lung disease: This diagnosis best explains the patient's persistent symptoms and CT findings (resolution of multifocal air-space opacities, peripheral curvilinear opacity, peripheral reticulation, basilar-predominant architectural distortion, traction bronchiectasis, and honeycombing in the lung bases) despite treatment. 2. Bacterial i…	1	9	9	1. Sepsis: The fever, myalgias, vomiting, increased shortness of breath, and hypotensive episode suggest a possible infection, with sepsis being the most likely explanation for this presentation. 2. Pneumonia: Organizing pneumonia was previously diagnosed, and the patient's ongoing symptoms, fever, and worsening shortness of breath raise the possibility of a current, recurrent, or superimposed pn…	0		8		1e-05	Human granulocytic anaplasmosis.	2990	https://www.cdc.gov/anaplasmosis/healthcare-providers/transmission-epidemiology.html
Case 6-2022	A 68-year-old man with metastatic melanoma was evaluated in the oncology clinic of this hospital because of fatigue and weight loss. Six years before the current evaluation, the patient received a diagnosis of superficial spreading melanoma of the left shoulder. He was treated with a wide local excision; a biopsy of the sentinel lymph node was negative for melanoma. One year before the current ev…	This 68-year-old man with metastatic melanoma presented for a routine clinic visit, where he reported a several-week history of fatigue, weight loss, polyuria, and polydipsia; blood testing revealed marked hyperglycemia. The hyperglycemia occurred in the context of ongoing cancer therapy and two recent episodes of illness: hypothyroidism and symptomatic coronary disease. I am confident that the p…	Immune checkpoint inhibitor–induced diabetes	Please read the following case, and provide a thorough and specific list of differential diagnosis for the underlying cause of this presentation. Please list the diagnosis that most explains all the features of the presentation first, and include rare diagnoses if they are the best explanation for the presentation. "A 68-year-old man with metastatic melanoma was evaluated in the oncology clinic o…	1. Malignant melanoma with metastases (most likely, given the patient's history and presentation) 2. Diabetic ketoacidosis (due to extremely elevated glucose level) 3. Hyperosmolar hyperglycemic state (due to extremely elevated glucose level) 4. Adrenal insufficiency (could explain fatigue and weight loss, especially in the context of previous steroid use) 5. Infection (could cause fatigue and we…	0		9	Diabetic Ketoacidosis (DKA): The patient's high blood glucose level, increased thirst, nocturia, weight loss, fatigue, and normal blood count suggest the possibility of DKA. Pancreatitis: Elevated blood glucose level, weight loss, and fatigue can be caused by pancreatitis. Renal Failure: The patient's increased thirst and nocturia may be indicative of renal failure. Hypophysitis: Hypophysitis is …	1	9	10	1. Diabetic ketoacidosis 2. Hyperosmolar Hyperglycemic State (HHS) 3. Pancreatitis 4. Steroid-induced hyperglycemia 5. Stress-induced hyperglycemia 6. Cancer-related hyperglycemia 7. Thyroid storm 8. Adrenal insufficiency 9. Syndrome of inappropriate antidiuretic hormone secretion (SIADH) 10. False-positive blood glucose reading	0		10	Metastatic melanoma with possible brain and lung metastases, causing fatigue and weight loss Uncontrolled diabetes mellitus, presenting with fatigue, weight loss, and increased thirst and nocturia Diabetic ketoacidosis, as a complication of uncontrolled diabetes mellitus, leading to weight loss, fatigue, and hyperglycemia Pembrolizumab-induced thyroiditis, leading to hypothyroidism and hyperglyce…	0		10	Based on the provided case, the following is a list of differential diagnoses for the underlying cause of the patient's presentation, ordered from the most likely to the rarest explanations: Pembrolizumab-induced diabetes mellitus: The patient's recent history of pembrolizumab treatment, combined with the reported symptoms of increased thirst, nocturia, and elevated blood glucose level, make this…	1	1	6	Based on the patient's presentation, the following differential diagnoses should be considered, listed in order of relevance: Pembrolizumab-induced diabetes mellitus: The patient's symptoms of fatigue, weight loss, increased thirst, and nocturia, along with the significantly elevated blood glucose level, suggest diabetes mellitus. The patient's recent treatment with pembrolizumab, an immune check…	1	1	5	1. Pembrolizumab-induced autoimmune diabetes: This immune checkpoint inhibitor has been reported to cause autoimmune endocrinopathies, including insulin-dependent diabetes. The patient's recent exposure to pembrolizumab, combined with the symptoms of increased thirst, nocturia, and weight loss with no change in appetite, raises suspicion for this diagnosis. 2. Type 2 diabetes mellitus: Given the …	1	1	8	1. Pembrolizumab-induced diabetes mellitus: The patient's recent treatment with pembrolizumab and presentation of hyperglycemia, fatigue, weight loss, increased thirst, and nocturia suggest the possibility of drug-induced diabetes mellitus. 2. Stress-induced hyperglycemia: The patient has a history of metastatic cancer, coronary artery disease, and recent coronary catherization. Stress-related hy…	1	1	7		1.52e-07	Immune checkpoint inhibitor–induced diabetes	60	1/100 cancer patients eligible for IO https://jamanetwork.com/journals/jamanetworkopen/fullarticle/2732329 1/100 of checkpoint inhibitor treated pts https://diabetesjournals.org/care/article/46/6/1292/148905/Risk-Factors-and-Characteristics-of-Checkpoint
Case 6-2023	A 68-year-old man was admitted to this hospital because of worsening confusion. The patient had a history of hypertension and coronary artery disease. A myocardial infarction had occurred 18 years before the current admission; atrial fibrillation had also been diagnosed at that time. He had taken warfarin for many years but had stopped taking it 10 years before this admission. Seven and a half we…	Differential Diagnosis Dr. Aneesh B. Singhal: In this 68-year-old man, multiple focal and nonfocal neurologic deficits developed over a period of 7 weeks, along with cognitive decline. Imaging revealed accumulating multifocal small ischemic lesions and white-matter lesions. In addition, lung and kidney masses that were suggestive of cancer were identified. Determining the cause of the strokes in …	Paraneoplastic vasculitis of the central nervous system.	Please read the following case, and provide a thorough and specific list of differential diagnosis for the underlying cause of this presentation. Please list the diagnosis that most explains all the features of the presentation first, and include rare diagnoses if they are the best explanation for the presentation. "A 68-year-old man was admitted to this hospital because of worsening confusion. T…	1. Multiple cerebral infarctions 2. Small vessel disease 3. Cardioembolic strokes 4. Atherosclerotic disease of the cervical and intracranial arteries 5. Hypercoagulable state 6. Atrial fibrillation 7. Hypertensive crisis 8. Urinary tract infection 9. Lung cancer with possible metastasis 10. Renal mass with possible metastasis 11. Drug-induced encephalopathy 12. Dementia 13. Vitamin B12 deficienc…	0		7	Differential Diagnosis for the underlying cause of the presentation: Cardioembolic stroke: This is the most likely diagnosis given the patient's past medical history, including atrial fibrillation and myocardial infarction. The presence of multiple infarcts in different regions of the brain, combined with the calcified atherosclerosis found on CT angiography, suggests that the cause of the stroke…	1	6	10	1. Cerebral small vessel disease (most likely explanation based on presentation of multiple acute infarcts involving both hemispheres and scattered patches of increased signal intensity) 2. Cardioembolic stroke (possible contributing factor based on history of atrial fibrillation) 3. Hypertensive encephalopathy (possible contributing factor based on history of hypertension) 4. Atheromatous diseas…	0		8	Possible differential diagnoses for the patient's presentation include: Cardioembolic stroke: The patient's history of atrial fibrillation, the location of the infarcts, and the lack of significant stenosis on CT angiography support the diagnosis of cardioembolic stroke. Small-vessel disease: The patient's multiple infarcts in different areas of the brain could be consistent with small-vessel dis…	1	5	10	Based on the provided case, here is a list of differential diagnoses for the underlying cause of the patient's presentation, ordered from the most likely to the least likely explanation: Cardioembolic stroke: The patient has a history of atrial fibrillation and has experienced multiple acute infarctions in different areas of the brain. This is the most likely explanation for the patient's present…	1	3	8	Based on the provided case, here is a list of differential diagnoses, starting with the most likely explanation for the patient's presentation: Multiple embolic strokes: The patient has a history of atrial fibrillation and numerous new small foci of acute infarctions in various regions of the brain. This is the most likely diagnosis, given the clinical history, the MRI findings, and the patient's…	1	2	6	1. Acute multifocal cerebral infarctions: The MRI findings of numerous new small foci of acute infarction involving various areas of the brain suggest a primary cerebrovascular event. The patient's history of myocardial infarction, atrial fibrillation, and cessation of warfarin therapy further supports this diagnosis. 2. Cardioembolic stroke: Given the patient's history of atrial fibrillation and…	1	6	9	1. Cardioembolic stroke: The patient has a history of atrial fibrillation and multiple foci of acute infarction on MRI, which are indicative of embolic events. Enoxaparin was given to treat cardioembolic stroke. 2. Small-vessel cerebrovascular disease: The MRI findings of scattered patches of increased signal intensity in the periventricular and subcortical white matter are indicative of moderate…	1	3	8		2e-06	Paraneoplastic vasculitis of the central nervous system.	56	https://www.ncbi.nlm.nih.gov/pmc/articles/PMC3151598/
Case 7-2022	A 65-year-old woman was admitted to this hospital because of depression, recurrent falls, and difficulty caring for herself. Four years before the current admission, the patient received a diagnosis of depression that was precipitated by psychosocial stressors. She was treated with bupropion, citalopram, and cognitive behavioral therapy. The depression was well controlled until 1 year before the …	Initial Clinical Impression Dr. Judith A. Restrepo: When I evaluated this patient before her transfer to the rehabilitation center, I obtained a psychosocial history with collateral information and performed bedside neuropsychological screening, which formed the basis of her psychiatric evaluation.1 She had cognitive deficits in delayed recall and executive function, with insight into the changes…	Diffuse large B-cell lymphoma.	Please read the following case, and provide a thorough and specific list of differential diagnosis for the underlying cause of this presentation. Please list the diagnosis that most explains all the features of the presentation first, and include rare diagnoses if they are the best explanation for the presentation. "A 65-year-old woman was admitted to this hospital because of depression, recurren…	1. Chronic small-vessel disease 2. Stroke (hemorrhagic or ischemic) 3. Dementia (Alzheimer's disease, vascular dementia) 4. Depression (including treatment-resistant depression) 5. Postconcussive syndrome 6. Functional neurologic disorder 7. Neoplasm (primary or metastatic) 8. Infectious disease (meningitis, encephalitis, abscess) 9. Metabolic disorder (hypoglycemia, hyponatremia, hepatic encepha…	1	7	17	1. Chronic traumatic encephalopathy (CTE): a progressive neurodegenerative disease that is common in individuals with a history of repetitive head trauma, and it presents with symptoms such as depression, memory loss, balance problems, and cognitive decline. 2. Normal pressure hydrocephalus: a condition in which cerebrospinal fluid accumulates in the brain's ventricles, causing progressive cognit…	0		9	1. Chronic Small-Vessel Disease 2. Multiple Sclerosis 3. Neurosyphilis 4. Cerebral Vasculitis 5. Creutzfeldt-Jakob Disease 6. Normal Pressure Hydrocephalus 7. Parkinson's Disease 8. Lewy Body Dementia 9. Frontotemporal Dementia 10. Huntington's Disease 11. Traumatic Brain Injury with Secondary Neurodegeneration 12. Vitamin B12 Deficiency 13. Wernicke-Korsakoff Syndrome 14. Autoimmune Encephalitis…	0		15	1. Multi-infarct dementia (vascular dementia): This condition is caused by multiple small strokes that lead to cognitive decline, mood disturbances, and gait abnormalities. The hypodensities observed in the subcortical and periventricular white matter on CT scan and patchy hyperintensities on T2-weighted FLAIR imaging of MRI suggest the presence of small vessel disease, which is a risk factor for…	0		9	Functional Neurologic Disorder (Conversion Disorder): This diagnosis is the most likely explanation for the patient's presentation, as her symptoms are inconsistent and variable, and she demonstrates normal strength and function in some settings. Her psychiatric history, including depression and anxiety, also supports this diagnosis. Progressive Multifocal Leukoencephalopathy (PML): The MRI findi…	0		7	Functional Neurologic Disorder (Conversion Disorder): This diagnosis is most consistent with the variable and inconsistent motor and sensory findings, as well as the patient's psychiatric history of depression, anxiety, and stress. Progressive multifocal leukoencephalopathy (PML): The MRI findings of increased signal intensity in the pons and periventricular distribution on T2-weighted imaging, a…	0		10	1. Functional neurological disorder (also known as conversion disorder): This diagnosis best explains the variable and inconsistent weakness and dragging of the left leg, as well as the patient's ability to use her left arm normally in some situations but not others. The presence of depression, anxiety, and psychosocial stressors also supports this diagnosis. 2. Progressive neurological disease: …	0		8	1. Functional neurologic disorder (conversion disorder) - best explains the inconsistency in her symptoms, normal gait on treadmill, sudden changes in clinical examination findings, and a negative workup with MRI and other tests. 2. Progressive multifocal leukoencephalopathy (PML) - possible given the hyperintensity on T2-weighted FLAIR imaging in the MRI, although no contrast enhancement has bee…	0		8		8e-05	Diffuse large B-cell lymphoma.	32061	https://pubmed.ncbi.nlm.nih.gov/38242772
Case 7-2023	A 70-year-old man with a history of kidney transplantation was evaluated at this hospital because of multiple erythematous rashes that had developed during an admission for respiratory failure, pneumococcal bacteremia, and kidney failure. Approximately 4.5 years before the current admission, the patient received a diagnosis of antineutrophil cytoplasmic antibody (ANCA)‚Äìassociated vasculitis aft…	Differential Diagnosis Dr. Michael K. Mansour: I participated in the care of this patient, and I am aware of the final diagnosis. This 70-year-old man ‚Äî who had a history of ANCA-associated vasculitis that was in remission, diabetes, and recent kidney transplantation ‚Äî was admitted to this hospital with SARS-CoV-2 infection and respiratory failure, for which he received mechanical ventilation…	Mucormycosis.	Please read the following case, and provide a thorough and specific list of differential diagnosis for the underlying cause of this presentation. Please list the diagnosis that most explains all the features of the presentation first, and include rare diagnoses if they are the best explanation for the presentation. "A 70-year-old man with a history of kidney transplantation was evaluated at this …	Differential diagnosis for the underlying cause of this presentation: 1. Pneumococcal pneumonia with sepsis and acute respiratory failure 2. Coronavirus disease 2019 (Covid-19) with pneumonia and acute respiratory distress syndrome (ARDS) 3. Antineutrophil cytoplasmic antibody (ANCA)-associated vasculitis with glomerulonephritis, allograft dysfunction, and pulmonary fibrosis 4. Hepatitis C virus …	0		20	Differential diagnoses for the presentation of a 70-year-old man with kidney transplantation, respiratory failure, pneumococcal bacteremia, and multiple erythematous rashes are: COVID-19: The patient had a positive SARS-CoV-2 RNA test and symptoms consistent with COVID-19. Pneumococcal infection: The patient had a history of pneumococcal bacteremia and current respiratory symptoms. ANCA-associate…	0		8	1. Pneumococcal pneumonia with sepsis and acute kidney injury 2. Covid-19 pneumonia with respiratory failure and acute kidney injury 3. Acute rejection of the kidney transplant with acute kidney injury and sepsis 4. ANCA-associated vasculitis with worsening kidney function, pneumonia, and sepsis 5. Drug-induced pneumonitis (e.g. mycophenolate mofetil or rituximab) with acute kidney injury and sep…	0		15	Differential diagnosis for the underlying cause of the presentation in a 70-year-old man with a history of kidney transplantation includes: Pneumonia: Bacterial or viral pneumonia may cause respiratory failure, and in this case, the patient had positive SARS-CoV-2 RNA. Recurrent or persistent ANCA-associated vasculitis (AAV): Despite treatment with rituximab and plasmapheresis, the patient's rena…	0		14	Based on the provided case, the following differential diagnoses are considered, in order of likelihood: Sepsis with multiorgan dysfunction, possibly due to a combination of SARS-CoV-2 infection and Streptococcus pneumoniae bacteremia. Kidney transplant rejection (acute or chronic) or dysfunction due to drug toxicity or infection. Recurrence or exacerbation of ANCA-associated vasculitis, although…	1	5	8	Based on the case presentation, here is a list of differential diagnoses for the underlying cause of the patient's presentation, ordered by the likelihood of explaining all the features: Severe COVID-19 pneumonia complicated by secondary bacterial infection (Streptococcus pneumoniae bacteremia) - given the positive SARS-CoV-2 RNA test, chest radiography findings, and positive blood cultures. ANCA…	1	7	9	1. Severe acute respiratory syndrome coronavirus 2 (SARS-CoV-2) infection: This diagnosis best explains the patient's asthma-like symptoms, the positive SARS-CoV-2 test result, and the radiographic findings in the chest. The patient's immunosuppressive therapy and close contact with a confirmed COVID-19 case also place him at increased risk. 2. Pneumococcal pneumonia: The patient has a positive b…	1	6	8	1. Severe Acute Respiratory Syndrome Coronavirus 2 (SARS-CoV-2) infection (COVID-19): The presentation of decreased urine output, malaise, rhinorrhea, cough, sinus congestion, and dyspnea in the context of close contact with a confirmed COVID-19 case, as well as a positive SARS-CoV-2 RNA test, makes this diagnosis most likely. 2. Pneumococcal pneumonia: The presence of Streptococcus pneumoniae in…	1	7	9		1e-06	Mucormycosis.	6592	https://pubmed.ncbi.nlm.nih.gov/9827260/
Case 8-2022	A 54-year-old woman with a history of episodic swelling of the arms, hands, and feet was evaluated in the emergency department of this hospital because of abdominal pain, nausea, and vomiting. Twenty-three years before the current presentation, swelling of the left hand developed after the patient sustained a human bite. The swelling was associated with mild pruritus, erythema, and warmth. The sw…	Differential Diagnosis Dr. Aleena Banerji: I was involved in the care of this patient, and I am aware of the diagnosis in this case. The differential diagnosis of recurrent swelling is broad. In the United States, angioedema has become the most common allergic disorder resulting in hospitalization, a fact that highlights the growing importance of this condition.1-3 In evaluating this patient with…	Hereditary angioedema with C1 inhibitor deficiency and chronic spontaneous urticaria.	Please read the following case, and provide a thorough and specific list of differential diagnosis for the underlying cause of this presentation. Please list the diagnosis that most explains all the features of the presentation first, and include rare diagnoses if they are the best explanation for the presentation. "A 54-year-old woman with a history of episodic swelling of the arms, hands, and f…	1. Acquired angioedema (most likely diagnosis) 2. Idiopathic angioedema 3. Hereditary angioedema 4. Mast cell activation syndrome 5. Systemic lupus erythematosus 6. Rheumatoid arthritis 7. Sarcoidosis 8. Lymphoma 9. Carcinoid syndrome 10. Hyperthyroidism 11. Hypothyroidism 12. Celiac disease 13. Inflammatory bowel disease (Crohn‚Äôs disease or ulcerative colitis) 14. Pancreatitis 15. Biliary dise…	1	3	21	Acquired angioedema due to C1 inhibitor deficiency Hereditary angioedema Idiopathic angioedema Allergic angioedema Drug-induced angioedema Angiotensin-converting enzyme inhibitor-induced angioedema Autoimmune disease-associated angioedema Lymphoproliferative disease-associated angioedema Vasculitis-associated angioedema Systemic mastocytosis Chronic urticaria and angioedema syndrome Paraneoplasti…	1	2	20	1. Hereditary Angioedema (HAE) - given the patient's previous diagnosis of acquired C1 inhibitor deficiency, history of episodic swelling involving the hands, feet, eyelids, and upper lip, and response to danazol and antihistamines. 2. Idiopathic angioedema - possible given the episodes of swelling that occurred after minor trauma, lack of clear triggers for swelling, and negative laboratory find…	1	1	7	1. Hereditary Angioedema (HAE): HAE is a genetic disorder characterized by recurrent episodes of edema affecting various body parts, including the extremities, face, genitalia, and gastrointestinal tract. It can be triggered by stress, trauma, infection, or hormonal changes. HAE is caused by mutations in the C1 inhibitor gene, which leads to decreased levels of functional C1 inhibitor protein, si…	1	1	8	Given the patient's history and presentation, the following differential diagnoses should be considered, ordered from most to least likely: Hereditary angioedema (HAE) with C1 inhibitor deficiency: The recurrent episodes of swelling in various body parts, lack of urticaria, and history of low C1 esterase inhibitor, C4, and C1q levels suggest HAE. Although the patient has been diagnosed with acqui…	1	1	7	Hereditary angioedema (HAE) - The most likely diagnosis based on the patient's history of episodic swelling, low levels of C1 esterase inhibitor, C4, and C1q, and response to danazol treatment. Additionally, the gastrointestinal symptoms can be attributed to angioedema involving the intestinal wall. Acquired angioedema (AAE) - Given the patient's presentation and the fact that the swelling episod…	1	1	7	1. Acquired C1 inhibitor deficiency (Angioedema due to C1 inhibitor deficiency): The history of episodic swelling, low levels of C1 esterase inhibitor, C4, and C1q, and improvement with danazol treatment support this diagnosis. 2. Gastrointestinal angioedema: This could be the underlying cause of the patient's abdominal symptoms, given the history of angioedema affecting other parts of her body. …	1	1	10	1. Acquired C1 inhibitor deficiency (angioedema) - This diagnosis explains the patient's history of episodic swelling of the arms, hands, and feet, as well as her facial swelling and pruritus. Her prior diagnosis and treatment with danazol also support this diagnosis. 2. Gastrointestinal angioedema - Although rarer, this diagnosis could explain the patient's abdominal pain, nausea, and vomiting, …	1	1	7		1e-05	Hereditary angioedema	3331	https://www.ncbi.nlm.nih.gov/pmc/articles/PMC3647445/
Case 8-2023	A 71-year-old woman was admitted to this hospital because of refractory hemolytic anemia. The patient, who had recurrent breast cancer and diffuse cutaneous systemic sclerosis, had been in her usual state of health until 7 months before the current admission, when fatigue and dyspnea on exertion developed. She was reportedly evaluated by a cardiologist and a pulmonologist, but no cause for her sy…	Differential Diagnosis Dr. Alfred I. Lee: This 71-year-old woman with breast cancer and systemic sclerosis had several months of progressive fatigue and dyspnea and was found to have microangiopathic hemolytic anemia (MAHA). MAHA is a subtype of intravascular hemolysis that is characterized by red-cell fragmentation due to direct trauma; the identification of two or more schistocytes on multiple …	Breast cancer–associated thrombotic microangiopathy.	Please read the following case, and provide a thorough and specific list of differential diagnosis for the underlying cause of this presentation. Please list the diagnosis that most explains all the features of the presentation first, and include rare diagnoses if they are the best explanation for the presentation. "A 71-year-old woman was admitted to this hospital because of refractory hemolytic…	Differential Diagnosis: 1. Paroxysmal Nocturnal Hemoglobinuria (PNH): This could be the most likely diagnosis given the symptoms and laboratory findings. PNH is a rare blood disorder characterized by hemolysis, thrombosis, and bone marrow failure. The presence of schistocytes, low haptoglobin, elevated LDH, and negative Coombs test are all consistent with PNH. However, the normal flow cytometry r…	0		7	Differential diagnosis for refractory hemolytic anemia in a 71-year-old woman: Thrombotic thrombocytopenic purpura (TTP): Symptoms of fatigue, dyspnea on exertion, anemia, schistocytes on peripheral smear, and increased lactate dehydrogenase (LDH) levels suggest microangiopathic hemolytic anemia (MAHA), which is a classic feature of TTP. Low ADAMTS13 levels (although this was not mentioned in the…	1	6	9	Differential Diagnosis: 1. Atypical hemolytic uremic syndrome (aHUS) 2. Thrombotic thrombocytopenic purpura (TTP) 3. Scleroderma renal crisis 4. Autoimmune hemolytic anemia (AIHA) 5. Metastatic breast cancer with bone marrow involvement 6. Lupus anticoagulant associated syndrome 7. Paroxysmal nocturnal hemoglobinuria (PNH) The most likely diagnosis is aHUS, as it can cause refractory hemolytic an…	0		7	Differential Diagnosis for Refractory Hemolytic Anemia in a 71-year-old woman with recurrent breast cancer and diffuse cutaneous systemic sclerosis: Microangiopathic hemolytic anemia (MAHA) Thrombotic thrombocytopenic purpura (TTP) Hemolytic uremic syndrome (HUS) Autoimmune hemolytic anemia (AIHA) Paroxysmal nocturnal hemoglobinuria (PNH) Disseminated intravascular coagulation (DIC) Drug-induced …	1	10	12	Based on the provided case presentation, the following differential diagnoses should be considered: Microangiopathic hemolytic anemia (MAHA) - The presence of schistocytes, an elevated LDH, and low haptoglobin levels are consistent with this diagnosis. Potential causes of MAHA include: a. Thrombotic thrombocytopenic purpura (TTP) - The patient was initially treated with plasmapheresis, but the AD…	1	4	7	Coombs'-negative autoimmune hemolytic anemia (AIHA): The patient presents with refractory hemolytic anemia, schistocytes on peripheral blood smear, and a negative direct antiglobulin test. Additionally, the patient has a history of autoimmune disorders, including diffuse cutaneous systemic sclerosis and SjÃ¶gren's syndrome, which may predispose her to AIHA. Thrombotic thrombocytopenic purpura (TT…	1	6	8	1. Refractory hemolytic anemia, potentially secondary to autoimmune hemolytic anemia, which could be due to underlying systemic sclerosis, SjÃ¶gren's syndrome, or breast cancer recurrence. 2. Thrombotic thrombocytopenic purpura (TTP), given the history of schistocytes, thrombocytopenia, and low ADAMTS13 activity. 3. Paroxysmal nocturnal hemoglobinuria (PNH), although the flow cytometry was negati…	1	6	10	1. Refractory hemolytic anemia associated with systemic sclerosis 2. Autoimmune hemolytic anemia (Coombs'-negative) 3. Microangiopathic hemolytic anemia secondary to cancer 4. Thrombotic thrombocytopenic purpura (TTP) 5. Paroxysmal nocturnal hemoglobinuria 6. Atypical hemolytic-uremic syndrome (aHUS) 7. Cold agglutinin disease 8. Hemolytic anemia due to drug-induced immune reaction 9. Disseminate…	0		9		1e-06	Breast cancer–associated thrombotic microangiopathy.	13	https://www.ncbi.nlm.nih.gov/pmc/articles/PMC4929977/
Case 9-2022	A 56-year-old woman was admitted to this hospital in the spring of 2020, during the initial surge of the coronavirus disease 2019 (Covid-19) pandemic in Boston, because of fever, myalgias, diarrhea, and a dry cough. Six weeks before this admission, the patient had contact with a person with confirmed severe acute respiratory syndrome coronavirus 2 (SARS-CoV-2) infection. At that time, she did not…	Differential Diagnosis Dr. Jatin M. Vyas: I participated in the care of this patient, and I am aware of the final diagnosis. This 56-year-old woman presented with fever, nonproductive cough, myalgias, hepatitis, thrombocytopenia, increased levels of inflammatory markers in the blood, and ground-glass opacities on chest CT, with her presentation occurring during the first surge of the Covid-19 pan…	Anaplasmosis	Please read the following case, and provide a thorough and specific list of differential diagnosis for the underlying cause of this presentation. Please list the diagnosis that most explains all the features of the presentation first, and include rare diagnoses if they are the best explanation for the presentation. "A 56-year-old woman was admitted to this hospital in the spring of 2020, during t…	Differential Diagnosis: - COVID-19 - Influenza - Pneumonia - Legionella Pneumonia - Streptococcal Pneumonia - Cytomegalovirus infection - Epstein-Barr virus infection - Rocky Mountain spotted fever - Lyme disease - Ehrlichiosis or Anaplasmosis infection - Q fever - Typhoid Fever - Malaria - Babesiosis - Leptospirosis - Acute HIV infection - Acute bacterial meningitis - Sepsis - Kawasaki disease -…	1	10	22	COVID-19: The patient's symptoms, contact with a person with COVID-19, and the presence of mild ground-glass opacities on chest CT make COVID-19 a likely differential diagnosis. Negative nasopharyngeal PCR testing does not entirely rule out COVID-19. Viral Pneumonia: Other viral causes such as influenza, adenovirus, respiratory syncytial virus, and human metapneumovirus may cause similar symptoms…	0		14	1. COVID-19 infection 2. Other viral respiratory infection (e.g. rhinovirus, adenovirus, parainfluenza) 3. Atypical pneumonia (e.g. Legionnaire's disease, Mycoplasma pneumonia) 4. Influenza 5. Bacterial pneumonia (e.g. Streptococcus pneumoniae, Haemophilus influenzae) 6. Acute bronchitis 7. Acute gastroenteritis 8. Other bacterial infections (e.g. meningitis, Lyme disease) 9. Autoimmune or rheuma…	0		15	1. COVID-19: Given the timing of the patient's symptoms, contact with a confirmed case, and the absence of any other apparent cause, COVID-19 is the most likely diagnosis. 2. Other viral respiratory infections: Although the patient tested negative for a variety of viral infections, it is still possible that she has a viral respiratory infection that was not tested for or was missed by the initial…	0		10	Based on the provided case presentation, here is a list of differential diagnoses, ordered from the most likely to the least likely explanation for the patient's symptoms: COVID-19 (SARS-CoV-2 infection) - Despite negative nucleic acid tests, the patient's symptoms, exposure history, and CT findings are consistent with COVID-19. Other viral infections - Though testing for several common respirato…	1	1	7	Based on the provided case, here is a list of differential diagnoses for the underlying cause of the presentation, starting with the most likely explanation: COVID-19 (SARS-CoV-2 infection): Despite the negative nasopharyngeal tests, the patient's symptoms, history of contact with a confirmed case, and CT chest findings are consistent with COVID-19. False-negative results can occur in the early s…	1	5	8	1. COVID-19 (SARS-CoV-2 infection): Despite two nasopharyngeal test results being negative, the symptoms of fever, myalgias, diarrhea, and dry cough are consistent with COVID-19. Also, the patient had contact with a person with confirmed SARS-CoV-2 infection. 2. Viral infections other than COVID-19: Negative testing results were found for several viruses, but there may still be untested or false-…	0		8	1. Covid-19 (SARS-CoV-2 infection): Despite negative tests, this diagnosis should still be considered due to the patient's symptoms and exposure history. False negative results can occur in Covid-19 testing. 2. Other viral infections: Even though testing for other common viruses was negative, the patient's presentation could still be due to an uncommon or atypical viral infection. 3. Bacterial in…	0		7		1e-05	Human granulocytic anaplasmosis.	2990	https://www.cdc.gov/anaplasmosis/healthcare-providers/transmission-epidemiology.html
Case 9-2023	A 20-year-old man with bipolar disorder was transferred to this hospital because of hemoptysis and hypoxemia. Eleven months before the current presentation, the patient received a diagnosis of bipolar disorder. Six weeks before the current presentation, he was taken to another hospital for evaluation of racing thoughts, generalized hyperactivity, and difficulty sleeping. He was admitted to a psyc…	Differential Diagnosis Dr. Shaun F. Fitzgerald: This 20-year-old man who had recently received a diagnosis of bipolar disorder was evaluated for chest pain after trauma to the chest wall. Chest CT revealed ground-glass opacities; this finding is nonspecific, with possible causes including infectious processes, chronic interstitial lung disease, and acute alveolar disease. Although the differentia…	Systemic lupus erythematosus with membranous lupus nephritis.	Please read the following case, and provide a thorough and specific list of differential diagnosis for the underlying cause of this presentation. Please list the diagnosis that most explains all the features of the presentation first, and include rare diagnoses if they are the best explanation for the presentation. " A 20-year-old man with bipolar disorder was transferred to this hospital because…	1. Pulmonary Embolism (most likely due to presentation features and CT angiography showing emboli in both pulmonary arteries and infarction in left upper and lower lobes) 2. Pneumonia (previous diagnosis, consolidation on chest X-ray, responded to doxycycline) 3. Hemoptysis (due to underlying pulmonary embolism or possible tuberculosis, malignancy or lung abscess) 4. Tuberculosis (weight loss, he…	1	15	15	Differential diagnosis for the underlying cause of this presentation: Pulmonary embolism Community-acquired pneumonia complicated by lung abscess or empyema Lung abscess Tuberculosis Fungal pneumonia Lung cancer Wegener's granulomatosis Churg-Strauss syndrome Goodpasture syndrome Systemic lupus erythematosus Antiphospholipid syndrome Behçet's syndrome Sarcoidosis Connective tissue disease-associa…	0		14	1. Pulmonary Embolism 2. Pneumonia 3. Lung Infarction 4. Chest Trauma 5. Asthma Exacerbation 6. Migraine Associated Vertigo 7. Viral bronchitis 8. Cystic Fibrosis 9. Alpha-1 Antitrypsin Deficiency 10. Leukemia 11. Lymphoma 12. Sepsis 13. Pulmonary Arteriovenous Malformation 14. Pulmonary Hypertension 15. Connective Tissue Disorders 16. Inflammatory Bowel Disease 17. Multiple Myeloma 18. DVT 19. A…	0		22	The differential diagnosis for this presentation includes: Pulmonary embolism - The CT angiography of the chest reveals emboli of the right and left pulmonary arteries that extend into multiple segmental and subsegmental branches. This is the most likely diagnosis based on the clinical history and imaging studies. Infectious pneumonia - The patient had symptoms of cough, shortness of breath, and …	0		10	Based on the provided case, here is a list of differential diagnoses for the underlying cause of this presentation, ordered by the most likely explanation for all the features: Pulmonary embolism with infarction: The CT angiography of the chest revealed emboli of the right and left pulmonary arteries that extended into multiple segmental and subsegmental branches. There were wedge-shaped opacitie…	0		12	Pulmonary embolism with infarction: The presence of emboli in both pulmonary arteries and wedge-shaped opacities in the left upper and lower lobes, along with hypoxemia, chest pain, and shortness of breath, strongly suggest pulmonary embolism with infarction. This diagnosis best explains most of the patient's symptoms. Pneumonia: Initial consolidation in the left lower lobe and left pleural effus…	1	6	8	1. Pulmonary embolism with infarction: CT angiography of the chest revealed emboli in the right and left pulmonary arteries, wedge-shaped opacities without enhancement in the left upper and lower lobes, and small pleural effusions. 2. Pneumonia: The patient was initially treated with doxycycline for presumed pneumonia; however, the symptoms persisted despite completing the antibiotic course. Ches…	1	7	10	1. Pulmonary embolism: This diagnosis is supported by the CT angiography findings of emboli in both the right and left pulmonary arteries, as well as the wedge-shaped opacities without enhancement in the left upper and lower lobes. 2. Pneumonia: The initial chest radiography revealed a consolidation in the left lower lobe and a left pleural effusion, and the patient was treated with doxycycline f…	0		8		5e-05	Systemic lupus erythematosus with membranous lupus nephritis.	1402	https://pubmed.ncbi.nlm.nih.gov/36227575/
Case 12-2023	A 44-year-old woman was evaluated in the rheumatology clinic of this hospital because of proximal muscle weakness and myalgia. The patient had been in her usual state of health until 5 years before the current presentation, when morning stiffness and pain developed in the small joints of both hands. Laboratory evaluation reportedly revealed elevated blood levels of anti–cyclic citrullinated pepti…	Differential Diagnosis Dr. Marcy B. Bolster: This 44-year-old woman with seropositive rheumatoid arthritis presented to the rheumatology clinic with a recent onset of fatigue, proximal muscle weakness, myalgia in the arms and legs, paresthesia in the hands and feet, and muscle spasms in the hands. The available laboratory data showed elevated levels of creatine kinase and lactate dehydrogenase, a…	Hypocalcemic myopathy due to hypoparathyroidism.	Please read the following case, and provide a thorough and specific list of differential diagnosis for the underlying cause of this presentation. Please list the diagnosis that most explains all the features of the presentation first, and include rare diagnoses if they are the best explanation for the presentation. "A 44-year-old woman was evaluated in the rheumatology clinic of this hospital bec…	1. Overlap myositis syndrome (most likely diagnosis): The patient presents with proximal muscle weakness, myalgia, elevated creatine kinase levels, and positive U1-RNP antibodies. Overlap myositis syndrome is characterized by a combination of features of different systemic autoimmune diseases, such as systemic lupus erythematosus, scleroderma, and polymyositis (or dermatomyositis). This diagnosis…	0		17	1. Polymyositis 2. Dermatomyositis 3. Inclusion body myositis 4. Mixed connective tissue disease 5. Overlap syndrome (e.g. scleroderma-polymyositis overlap) 6. Systemic lupus erythematosus (SLE) with myositis 7. Thyroid myopathy 8. Hypoparathyroid myopathy 9. Drug-induced myositis 10. Hypothyroid myopathy Rare diagnoses: 1. Antisynthetase syndrome 2. Necrotizing autoimmune myopathy 3. Statin myop…	1	8	17	1. Polymyositis: This autoimmune condition can present with proximal muscle weakness, myalgia, and elevated muscle enzymes. The presence of anti–U1-ribonucleoprotein (U1-RNP) antibodies supports the autoimmune nature of the condition. 2. Dermatomyositis: Another autoimmune condition that can cause muscle weakness and myalgia. It is associated with skin changes including a characteristic rash. 3. …	1	8	10	1. Polymyositis - Given the proximal muscle weakness, myalgia, elevated creatine kinase and lactate dehydrogenase levels, and presence of anti–U1-ribonucleoprotein (U1-RNP) antibodies. The response to azathioprine also supports this diagnosis. 2. Dermatomyositis - Similar presentation to polymyositis but with characteristic cutaneous manifestations such as Gottron's papules and heliotrope rash. 3…	1	4	10	1. Mixed connective tissue disease (MCTD): This diagnosis is most consistent with the patient's presentation. It explains the proximal muscle weakness, myalgia, positive anti-U1-RNP antibodies, signs of rheumatoid arthritis, high ANA titer, and the family history of systemic lupus erythematosus. In MCTD, patients may initially present with features of one autoimmune disease (in this case, rheumat…	0		11	1. Mixed Connective Tissue Disease (MCTD): This is a rare autoimmune disorder that shares features of other connective tissue disorders, such as lupus, scleroderma, and polymyositis. This patient’s presentation of joint pain, proximal muscle weakness and myalgia, along with positive anti-U1RNP and elevated level of creatine kinase and lactate dehydrogenase are highly suggestive of MCTD. 2. Myopat…	1	8	8	1. Polymyositis: The patient's elevated creatine kinase and lactate dehydrogenase levels, muscle weakness and myalgia point towards this diagnosis. Predominant symptoms are muscle weakness, dysphagia and respiratory muscle weakness in some. 2. Dermatomyositis: While this normally presents with a rash which this patient does not have, muscle symptoms and elevated muscle enzyme levels may precede r…	1	5	10	1. Sjögren's syndrome: This immune system disorder is manifested as fatigue and joint pain or swelling. Possibility of muscle pain, numbness and tingling in extremities. It could also present with Sjögren's syndrome-related myopathy or neuropathy. 2. Polymyositis/Dermatomyositis: These conditions present with symptom of difficulty lifting arms. Characterized by inflammation and weakness of the mu…	1	11	15		1e-06	Hypocalcemic myopathy	8	Case report https://academic.oup.com/mr/article-abstract/12/2/186/6314193
Case 13-2023	A 25-year-old woman with a history of acute intermittent porphyria was admitted to this hospital because of abdominal pain and jerking movements of the right arm and leg. The patient had been in her usual state of health until 2 days before this admission, when diffuse abdominal pain and nausea developed. She also felt confused and agitated, and a rash developed on her chest. One day before this …	Differential Diagnosis Dr. Leigh H. Simmons: If I were hearing this case presented on morning rounds, a few things would catch my attention right away. I would be very concerned about the extent of this patient’s illness. This young woman has been transferred to our hospital with a dramatic presentation, an apparent exacerbation of a serious and rare disease — one that I have not treated before, …	Factitious disorder.	Please read the following case, and provide a thorough and specific list of differential diagnosis for the underlying cause of this presentation. Please list the diagnosis that most explains all the features of the presentation first, and include rare diagnoses if they are the best explanation for the presentation. "A 25-year-old woman with a history of acute intermittent porphyria was admitted t…	1. Acute intermittent porphyria 2. Psychogenic non-epileptic seizures 3. Porphyria variegata 4. Systemic lupus erythematosus 5. Neuroleptic malignant syndrome 6. Acute intermittent porphyria-triggered status epilepticus 7. Acute porphyric attack 8. Hepatic porphyria Rare Diagnoses: 1. Porphobilinogen deaminase deficiency 2. Porphyria cutanea tarda 3. Porphyria due to elevated porphobilinogen leve…	0		12	1. Acute intermittent porphyria 2. Seizure disorder 3. Acute intoxication 4. Metabolic disorder (e.g. diabetic ketoacidosis) 5. Neurological disorder (e.g. stroke, transient ischemic attack) 6. Side effects of medications (e.g. drug-induced movement disorder) 7. Inflammatory bowel disease 8. Acute pancreatitis 9. Hysteria 10. Malingering Rare diagnoses: 1. Acute porphyria attack induced by enviro…	1	12	15	Differential Diagnosis: 1. Acute intermittent porphyria (most likely diagnosis) 2. Non-epileptic psychogenic seizures 3. Drug-induced movement disorder 4. Conversion disorder 5. Acute dystonia 6. Status migrainosus 7. Anaphylaxis 8. Acute abdomen 9. Psychotic disorder (delirium or psychosis) 10. Serotonin syndrome Rare Diagnoses: 1. Paroxysmal kinesigenic dyskinesia 2. Hemiplegic migraine 3. Here…	0		16	1. Acute intermittent porphyria (AIP) - Given the patient's history of AIP, recurrent flares, trigger factors, characteristic symptoms (abdominal pain, jerking movements, rash), and poor response to treatment with hemin infusion, this is the most likely diagnosis that explains the presentation. 2. Status epilepticus - Considering the jerking movements reported by the patient and concern for seizu…	0		10	1. Acute intermittent porphyria (AIP): The patient’s history of AIP in combination with her presentation makes this the most plausible diagnosis. The neurological symptoms, abdominal pain, and the development of a rash; all can be associated with AIP. Her history of episodes of right-sided jerking movements suggestive of seizures is typical of AIP. The stressors she mentioned such as menses, stre…	1	3	7	1. Acute Intermittent Porphyria (AIP): This is the most probable diagnosis as the patient has a known history of AIP, and is presenting with symptoms consistent with a flare of AIP, which include abdominal pain, muscle weakness, nausea, and confusion. 2. Malingering: Even though this diagnosis may sound harsh, the minimal change in the patient's symptoms despite adequate management of her known c…	1	2	10	1. Acute intermittent porphyria: The patient has a history of this condition, and she has experienced periodic flares of symptoms that involve abdominal pain, neurological symptoms (including jerking movements and confusion), and a rash. The patient also identifies stress, heat, and menses as triggers for her flares, and she has been able to successfully treat previous instances with hemin infusi…	0		8	1. Acute Intermittent Porphyria (AIP) Flare: Given her persistent symptoms of abdominal pain, neuromuscular weakness, mental disturbance, skin rash, and known history of AIP, this is a plausible differential. However, her uroporphyrin and urinary PBG levels turned out normal, which is unusual in a typical AIP attack. 2. Psychogenic Non-Epileptic Seizures (PNES): The uncontrolled jerking movements…	1	6	11		0.01	Factitious disorder.	3474	https://www.ncbi.nlm.nih.gov/pmc/articles/PMC5729833/
Case 14-2023	A 31-year-old man was evaluated in the emergency department of this hospital because of redness of the right eye. The patient had been in his usual state of health until 8 days before the current evaluation, when he noticed an itchy perianal rash and rectal pain. After 2 days, the symptoms did not abate, and he sought evaluation in the urgent care clinic of this hospital. On evaluation, the patie…	Differential Diagnosis Dr. Miriam B. Barshak: Severely painful, unilateral acute conjunctivitis with small-to-medium-sized follicles developed in this patient while he was taking tecovirimat for mpox. Severe pain is unusual in patients with conjunctivitis and suggests the possibility of scleritis, keratitis, or uveitis, but a detailed examination revealed no involvement of other anatomical region…	Mpox conjunctivitis	Please read the following case, and provide a thorough and specific list of differential diagnosis for the underlying cause of this presentation. Please list the diagnosis that most explains all the features of the presentation first, and include rare diagnoses if they are the best explanation for the presentation. "A 31-year-old man was evaluated in the emergency department of this hospital beca…	1. Acute bacterial conjunctivitis 2. Viral conjunctivitis (including herpes simplex virus or varicella-zoster virus) 3. Allergic conjunctivitis 4. Chlamydial conjunctivitis 5. Scleritis or episcleritis 6. Orbital cellulitis 7. Keratitis 8. Intraocular foreign body 9. Orbital fracture 10. Dacryocystitis 11. Acute angle-closure glaucoma 12. Acute anterior uveitis 13. Endophthalmitis 14. Ocular herp…	0		34	1. Ocular monkeypox infection with secondary conjunctivitis: - This diagnosis best explains the patient's recent exposure to monkeypox virus, presence of respiratory symptoms, rash on the chest, abdomen, and back, perianal ulcers and pustules, and sudden onset of redness, discomfort, and severe pain in the right eye. Ocular monkeypox infection can present with conjunctivitis and can lead to signi…	1	1	6	1. Infectious conjunctivitis: Given the patient's recent diagnosis of mpox virus infection, it is possible that the redness, discomfort, and pain in the right eye could be secondary to an infectious conjunctivitis from the same virus. 2. Herpes simplex virus keratitis: The patient has a history of herpes virus infection, and the presence of a perianal vesicle and ulcers could suggest disseminated…	1	1	7	1. Endophthalmitis: Given the patient's recent history of mpox virus infection and the development of redness, discomfort, and severe pain in the right eye, endophthalmitis is a possible differential diagnosis. This is a rare but serious condition that can occur as a result of systemic viral infections leading to intraocular inflammation. 2. Herpes Zoster Ophthalmicus: The patient's presentation …	0		11	1. Monkeypox: This is a rare viral disease that is most common in rural regions of Central and West Africa. The diagnosis is based on the characteristic skin rash, and positive PCR test. Though rare, it can explain the perianal rash, rectal pain, ulcers, and vesicle, as well as generalized lymphadenopathy, and fever. An extension of the rash to the chest, abdomen, and back, and development of sym…	1	1	9	Major differential diagnoses include: 1. Monkeypox - This patient's clinical presentation of perianal vesicles and ulcers, systemic symptoms (fever, headache, malaise), as well as systemic rash is highly suggestive of this rare viral infection, especially in the context of a positive mpox PCR from a perianal swab. Known contact with an affected individual definitively supports this diagnosis. The…	1	1	11	1. Monkeypox: The patient's presentation of multiple, shallow, tender ulcers distributed over his body, lymphadenopathy, fever, chills, fatigue, malaise, headache, and the detection of MPXV DNA from a perianal vesicle are all highly suggestive of a systemic monkeypox infection. The recent occurrence of redness and discomfort in the right eye may suggest the spread of the monkeypox infection leadi…	1	1	9	1. Monkeypox: The test results showed positive for monkeypox virus in the patient's system. Monkeypox exhibits symptoms such as fever, malaise, and a vesicular pustular rash that matches this patient’s symptoms. Pathognomonic features of monkeypox includes vesiculopustular rash over the face and extremities, lymphadenopathy, and fever, which is relapsing and remissive in nature. The development o…	1	1	6		1e-05	Mpox conjunctivitis	19	https://www.cdc.gov/poxvirus/mpox/cases-data/technical-report/report-4.html https://www.nature.com/articles/s41433-022-02195-z Product of indiviudal at increased risk incidence in USA, incidence of MPOX in individuals of increased risk, and risk of eye disease
Case 15-2023	A 33-year-old man was evaluated in the emergency department of this hospital because of progressively worsening paresthesia. The patient had been in his usual state of health until 8 weeks before the current evaluation, when he began to have an abnormal tingling sensation in the toes that he described as “pins and needles.” Over the course of several days, the paresthesia extended to the feet. Si…	Differential Diagnosis Dr. William P. Schmitt: This 33-year-old graduate student — who had a history of use of alcohol, cocaine, nitrous oxide, lysergic acid diethylamide, and ketamine — presented with progressively worsening, painless, symmetric sensory deficits that had begun 8 weeks earlier, with eventual gait and hand ataxia. Because the patient’s presentation is most consistent with a neurol…	Functional vitamin B12 deficiency from use of nitrous oxide.	Please read the following case, and provide a thorough and specific list of differential diagnosis for the underlying cause of this presentation. Please list the diagnosis that most explains all the features of the presentation first, and include rare diagnoses if they are the best explanation for the presentation. "A 33-year-old man was evaluated in the emergency department of this hospital beca…	1. Multiple Sclerosis (MS) 2. Chronic inflammatory demyelinating polyneuropathy (CIDP) 3. Subacute combined degeneration due to vitamin B12 deficiency 4. Hereditary polyneuropathy 5. Lyme Neuroborreliosis 6. Sarcoidosis 7. HIV-associated neuropathy 8. Guillain-Barre Syndrome 9. Vasculitis 10. Metachromatic leukodystrophy Please note that based on the provided information, the most likely diagnosi…	1	3	10	1. Multiple Sclerosis (MS) - The presentation of progressive paresthesia, headaches, lesions in the white matter on MRI, and sensory deficits are consistent with MS. 2. Neurosarcoidosis - Sarcoidosis can involve the central nervous system, leading to neurological symptoms like paresthesia and sensory deficits. 3. Neuromyelitis Optica (NMO) - NMO commonly presents with optic neuritis and myelitis,…	1	9	10	1. Guillain-Barre Syndrome - Most likely explanation given the progressive paresthesia, ascending pattern of sensory deficits, absent reflexes in the legs, positive Romberg test, and unsteady gait. 2. Neuromyelitis Optica (Devic's Disease) - Rare but possible given the presence of extensive longitudinal myelitis, though typically associated with optic neuritis. 3. Chronic Inflammatory Demyelinati…	1	4	14	The most likely differential diagnosis for the underlying cause of this presentation is Guillain-Barré syndrome (GBS). However, there are several other differential diagnoses that should be considered based on the clinical presentation described: 1. Guillain-Barré syndrome (GBS) - an acute inflammatory polyneuropathy involving the peripheral nervous system which often presents with ascending pare…	1	4	10	1. Nitrous Oxide Inhalation Myelopathy: A history of recreational nitrous oxide use, symptoms of progressive paresthesia ascending from the extremities, decreased vibratory sensation and proprioception, and positive Romberg test are all suggestive of subacute combined degeneration of the spinal cord due to nitrous oxide abuse. Nitrous oxide inactivates vitamin B12, leading to such neurological si…	1	1	14	1. Guillain-Barré Syndrome: Progressive and symmetrical paresthesia that started from the periphery, decreased deep tendon reflexes, and use of bupropion are indicative of this condition. MRI brain findings were not typical for Guillain–Barré syndrome; however, central nervous system involvement has been published. 2. Chronic Inflammatory Demyelinating Polyradiculoneuropathy (CIDP): Similar to Gu…	1	13	14	1. Nitrous Oxide (N2O) toxicity: This is a highly plausible cause of the reported symptoms considering the patient's history of nitrous oxide use. N2O toxicity can lead to subacute combined degeneration of the spinal cord characterized by ascending paraesthesia, as described by the patient. Additionally, ataxia and positive Romberg sign secondary to dorsal column dysfunction can be seen. Despite …	1	1	9	1. Multiple Sclerosis (MS): The MRI findings along with the progressive neurological symptoms of paresthesia point towards a demyelinating disease like MS. Typically, symptoms can affect the motor, sensory, or autonomic functions of the body. The episodic headaches can also be seen in some MS patients. 2. Subacute Combined Degeneration: This is due to a deficiency of vitamin B12. While the patien…	1	2	10		1e-06	Vitamin B12 deficiency from use of nitrous oxide	296	Case reports only https://onlinelibrary.wiley.com/doi/10.1111/ajad.12372
Case 16-2023	A 13-year-old boy with a history of attention deficit–hyperactivity disorder (ADHD), borderline personality disorder, and major depressive disorder was evaluated in the emergency department of this hospital because of worsening depression, thoughts of self-injurious behavior, and suicidality. The patient had a history of impulsivity and frequent episodes of self-injury, such as head-butting and c…	Differential Diagnosis Dr. Kevin R. Schwartz: This 13-year-old boy with ADHD, borderline personality disorder, and major depressive disorder had a prolonged stay in the acute psychiatric service of the emergency department while he was awaiting admission to an inpatient psychiatric hospital. There was a history of suicidality, several episodes of self-injury, and treatment with multiple psychiatr…	Clonidine OD	Please read the following case, and provide a thorough and specific list of differential diagnosis for the underlying cause of this presentation. Please list the diagnosis that most explains all the features of the presentation first, and include rare diagnoses if they are the best explanation for the presentation. "A 13-year-old boy with a history of attention deficit–hyperactivity disorder (ADH…	1. Major depressive disorder with psychotic features: The patient's history of worsening depression, recurrent suicidal ideation, self-injurious behavior, poor concentration, and feelings of hopelessness are all consistent with major depressive disorder. The psychotic features, such as hallucinations, delusions, or disorganized thinking, are not present in this case. 2. Borderline personality dis…	0		8	1. Psychogenic polydipsia: This condition is characterized by an excessive intake of fluids as a result of a psychological illness, such as the patient's history of borderline personality disorder and major depressive disorder. It can lead to hyponatremia, which can manifest with symptoms such as lightheadedness, nausea, abdominal pain, and hypotension. 2. Serotonin syndrome: Given the patient's …	0		10	1. Serotonin Syndrome - Given the history of major depressive disorder, the use of multiple serotonergic medications (lurasidone, sertraline) along with the abrupt addition of intramuscular olanzapine can lead to serotonin syndrome, which can present with altered mental status, agitation, autonomic instability, and gastrointestinal symptoms. 2. Neuroleptic Malignant Syndrome (NMS) - With the abru…	1	10	11	1. Major Depressive Disorder with Psychotic Features 2. Borderline Personality Disorder 3. ADHD 4. Adjustment Disorder 5. Self-Injurious Behavior 6. Suicidal Ideation 7. Ganser Syndrome 8. Factitious Disorder 9. Intermittent Explosive Disorder 10. Substance-Induced Mood Disorder Rare Diagnoses: 1. Anti-NMDA Receptor Encephalitis 2. Autoimmune Encephalitis 3. Wilson's Disease 4. Porphyria 5. Neuro…	0		15	1. Psychiatric disorders: The patient's history and presentation is most consistent with his known diagnoses, including ADHD, borderline personality disorder, and major depressive disorder. His symptoms of impulsivity, suicidal ideation, self-injury, and depression are all in keeping with these disorders. 2. Neuroleptic malignant syndrome: This syndrome can develop as a serious complication of an…	1	6	12	1. Major depressive disorder with suicidal tendencies: Based on the patient's history and repeated emergency room visits and hospitalizations for suicidal ideation and attempts. 2. Side effects or toxicity from medication: Given the range of medications the patient is on (extended-release guanfacine, lurasidone, sertraline, diphenhydramine, melatonin, oral clonidine, and oral or intramuscular ola…	1	2	19	1. Medication side effects/Adverse Drug Reaction: Deviating blood pressure and altered mental state could possibly be contributions of a drug interaction or adverse reaction. The patient is on multiple medications, namely extended-release guanfacine, luarisdone, sertraline, diphenhydramine, melatonin, and olanzapine. - Olanzapine overdose/toxicity: The prolonged use and combination of both oral a…	1	1	15	1. Acute Psychotic Episode: The patient's agitation, self-harm attempts, and suicidal ideations may denote an acute psychotic episode that may be related to his diagnoses of ADHD, borderline personality disorder, and major depressive disorder. 2. Medication-Induced Agitation: The multiple medications administered over time to manage the patient's psychiatric condition (guanfacine, lurasidone, ola…	1	7	18		1e-06	Guanfacine overdose	18	Case reports only https://www.ncbi.nlm.nih.gov/pmc/articles/PMC8975677/
Case 17-2023	A 58-year-old woman was evaluated in the infectious disease clinic of this hospital because of fatigue, abdominal bloating, and eosinophilia. The patient had been in her usual state of health until 8 months before the current evaluation, when she fell and injured her right leg while hiking in a rainforest in the Democratic Republic of Congo (DRC). Before this injury, she had been traveling throug…	Differential Diagnosis Dr. Natasha S. Hochberg: This patient was referred to the infectious disease clinic of this hospital because of moderate eosinophilia associated with travel, most recently to the DRC, where she had sustained a traumatic fracture of the right leg. Other exposures included walking barefoot, swimming in freshwater, spending time by rivers, and receiving a blood transfusion. He…	Mansonella perstans infection.	Please read the following case, and provide a thorough and specific list of differential diagnosis for the underlying cause of this presentation. Please list the diagnosis that most explains all the features of the presentation first, and include rare diagnoses if they are the best explanation for the presentation. "A 58-year-old woman was evaluated in the infectious disease clinic of this hospit…	1. Strongyloidiasis 2. Eosinophilic fasciitis 3. Eosinophilic pneumonia 4. Hypereosinophilic syndrome 5. Parasitic infection (e.g. schistosomiasis, filariasis) 6. Churg-Strauss syndrome 7. Sarcoidosis 8. Whipple's disease 9. Lymphoma 10. Tropical pulmonary eosinophilia 11. Eosinophilic granulomatosis with polyangiitis Most likely diagnosis: Strongyloidiasis Rare diagnoses: Eosinophilic fasciitis,…	0		11	1. Strongyloidiasis 2. Eosinophilic granulomatosis with polyangiitis (Churg-Strauss syndrome) 3. Hypereosinophilic syndrome 4. Helminth infection (such as schistosomiasis) 5. Chronic myeloid leukemia 6. Granulomatosis with polyangiitis (Wegener's granulomatosis) 7. Coccidioidomycosis 8. Lymphoproliferative disorder 9. Sarcoidosis 10. Tropical pulmonary eosinophilia	0		9	Most likely diagnosis: 1. Tropical pulmonary eosinophilia (TPE): This diagnosis fits well with the patient's travel history to tropical regions, as well as the presence of eosinophilia, pulmonary symptoms (mild cough), and systemic symptoms (fatigue, weight gain, abdominal bloating). Differential diagnoses: 2. Eosinophilic granulomatosis with polyangiitis (Churg-Strauss syndrome): This autoimmune…	0		13	1. Strongyloidiasis - A parasitic infection caused by the nematode Strongyloides stercoralis, commonly found in tropical and subtropical regions. Can present with eosinophilia, weight gain, fatigue, and abdominal bloating. Risk factors include travel to endemic regions and walking barefoot in contaminated soil or water. 2. Eosinophilic granulomatosis with polyangiitis (formerly Churg-Strauss synd…	0		12	1. Schistosomiasis: This parasitic infection is common in the Democratic Republic of Congo. The patient's eosinophilia, history of freshwater exposure, abdominal bloating, fatigue, and weight gain are all compatible with this infection. The calcified lesions found on CT scan reinforce this diagnosis, suggestive of chronic granulomatous disease caused by the eggs deposited by the Schistosoma worms…	0		11	1. Parasitic Infection: The patient's history of travel to the Democratic Republic of Congo, eosinophilia, and subsequent lesion findings point towards a parasitic infection such as Schistosomiasis. 2. Fungal Infection: Given the patient lives in a house with mold and the finding suggesting granulomatous disease, there may be fungal infection, such as Histoplasmosis. 3. Non-parasitic Tropical Inf…	0		16	1. Echinococcosis/Hydatid disease: This is a parasitic infection that often presented with eosinophilia and granulomatous disease. The patient's travel history to areas endemic for this parasitic infection and abdominal symptoms make this a key differential diagnosis. 2. Tropical Pulmonary Eosinophilia: Can occur due to parasitic infections such as filarisasis and is associated with eosinophilia …	0		1	1. Parasitic infection: Given the patient's history of travel and the recent exposure in a rainforest in DRC, a parasitic infection is certainly high on the differential. Certain parasites, such as Strongyloides, Schistosoma, and other helminths can cause eosinophilia, bloating, and fatigue. Even though her test for strongyloidiasis was negative, other parasites could be involved. 2. Fungal infec…	0		10		0.2	Mansonella perstans infection.	337	Per endemic areas as patient travelled: https://pubmed.ncbi.nlm.nih.gov/20152790/
Case 18-2023	A 19-year-old woman was transferred to this hospital because of respiratory failure. The patient had been in her usual state of health until 3 weeks before the current presentation, when pain developed in the right shoulder and the right flank. She was evaluated in the emergency department of another hospital and was discharged home after testing for kidney stones and appendicitis was reportedly …	Differential Diagnosis Dr. Cory A. Perugino: This young woman presented with a subacute illness involving the lungs, mitral and aortic valves, myocardium, pericardium, and aorta that was characterized by inflammatory features. The first step in developing a differential diagnosis is to consider whether a multiorgan inflammatory process caused this patient’s presentation or whether a primary infla…	Takayasu’s arteritis.	Please read the following case, and provide a thorough and specific list of differential diagnosis for the underlying cause of this presentation. Please list the diagnosis that most explains all the features of the presentation first, and include rare diagnoses if they are the best explanation for the presentation. "A 19-year-old woman was transferred to this hospital because of respiratory failu…	1. Infectious endocarditis 2. Takayasu arteritis 3. Giant cell arteritis 4. Behcet's disease 5. Systemic lupus erythematosus 6. Sarcoidosis 7. Rheumatoid arthritis 8. Granulomatosis with polyangiitis 9. Myocarditis 10. Dilated cardiomyopathy The diagnosis that most likely explains all the features of the presentation is Infectious endocarditis, given the history of intermittent back pain, SARS-Co…	1	2	10	1. Takayasu arteritis 2. Giant cell arteritis 3. Behçet's disease 4. Ankylosing spondylitis 5. Systemic lupus erythematosus 6. Tuberculous aortitis 7. Sarcoidosis 8. Bacterial endocarditis 9. Rheumatoid arthritis 10. Vasculitis 11. Syphilis The diagnosis that most explains all the features of the presentation is Takayasu arteritis, given the patient's history of intermittent back pain, recent SAR…	1	1	11	1. Differential Diagnosis for Multisystem Inflammatory Syndrome in Adults (MIS-A) - This diagnosis may explain the patient's recent history of SARS-CoV-2 infection, inflammatory markers, multisystem involvement including cardiac, respiratory, and gastrointestinal symptoms, as well as evidence of active inflammation on imaging studies. 2. Differential Diagnosis for Rheumatologic Conditions such as…	1	5	11	1. Takayasu arteritis: This rare autoimmune condition affects large blood vessels, including the aorta and its branches. It can lead to symptoms such as chest pain, shortness of breath, and hypertension. The narrowing of blood vessels can cause organ damage, which may explain the multisystem involvement seen in this case. 2. Giant cell arteritis: Another autoimmune condition that primarily affect…	1	1	8	1. Infective Endocarditis: Given the presence of a murmur, severe aortic regurgitation, pulmonary edema, and signs of infection (elevated CRP, ESR), the young woman could be dealing with a case of infectious endocarditis. The intimation of a possible aortic-root abscess, while not confirmed by other scans, could still point to this. 2. Myocarditis: This could have been triggered by a recent asymp…	1	8	9	The differential diagnosis for this patient includes: 1. Endocarditis: The elevated erythrocyte sedimentation rate, C-reactive protein, and NT-proBNP, along with the severe aortic regurgitation, makes this diagnosis a possibility. However, the patient's blood cultures were reportedly negative, and while echo was suggestive of aortic root abscess, CT angiogram did not show definitive signs of it. …	1	5	11	1. Infective Endocarditis: The patient's history of a recent dental cleaning procedure, fever and new onset regurgitant murmur suggest the possibility of infective endocarditis despite the lack of visible vegetations on echocardiogram. The CT findings of possible aortic root abscess imply an advanced stage of the disease. 2. Giant Cell Arteritis (GCA)/Takayasu's arteritis: The noted aortic mural …	1	3	11	1. Infective endocarditis: The patient's clinical manifestations including fever, worsening dyspnea, cough, and severe aortic regurgitation may suggest an infective endocarditis. Another evidence supporting this diagnosis is the murmur heard on the cardiac exam. However, there was lack of evidence of valvular vegetation, which is a classic finding in infective endocarditis. 2. Giant cell arteriti…	1	3	11		1e-06	Takayasu’s arteritis.	5804	www.ncbi.nlm.nih.gov/books/NBK459127/
Case 19-2023	An 80-year-old man was evaluated in the neurology clinic of this hospital because of left foot drop. The patient had been in his usual state of health until 5 years before the current presentation, when he first noticed that he needed to lift up his left leg while walking in order to prevent the toes of his left foot from dragging on the ground. During the next 2 years, his ability to dorsiflex t…	Differential Diagnosis Dr. Paloma González-Pérez: This 80-year-old man presented with a 5-year history of progressive and painless left foot drop. Examination revealed weakness that involved not only distal left-leg muscles but also facial, periscapular, hip-flexor, and distal right-leg muscles. In constructing a differential diagnosis, I will begin by localizing the patient’s symptoms and examin…	Facioscapulohumeral muscular dystrophy.	Please read the following case, and provide a thorough and specific list of differential diagnosis for the underlying cause of this presentation. Please list the diagnosis that most explains all the features of the presentation first, and include rare diagnoses if they are the best explanation for the presentation. "An 80-year-old man was evaluated in the neurology clinic of this hospital because…	Differential Diagnosis: 1. Lumbar disk herniation causing compression of the L5 and S1 nerve roots - This is the most likely diagnosis given the patient's symptoms of left foot drop, progressive weakness in dorsiflexion of the left ankle, and imaging findings of disk herniation at L5 and S1. The asymmetric findings on examination also support this diagnosis. 2. Lumbar radiculopathy at L5 and S1 -…	0		10	1. Lumbar disk herniation causing left foot drop 2. Lumbar radiculopathy at L5 and S1 3. Facet hypertrophy contributing to mild spinal stenosis 4. Polyneuropathy 5. Multifocal motor neuropathy 6. Amyotrophic lateral sclerosis (ALS) 7. Guillain-Barré syndrome 8. Charcot-Marie-Tooth disease 9. Spinal cord tumor 10. Vasculitis affecting peripheral nerves	0		10	1. Lumbar disk herniation with nerve root impingement 2. Lumbar radiculopathy 3. Charcot-Marie-Tooth disease 4. Amyotrophic lateral sclerosis 5. Multifocal motor neuropathy 6. Chronic inflammatory demyelinating polyneuropathy 7. Mononeuritis multiplex 8. Hereditary spastic paraplegia 9. Motor Neuron Disease 10. Paraneoplastic syndrome It is important to note that the most common cause of this pat…	0		10	1. Lumbar disk herniation causing left foot drop 2. Lumbar radiculopathy 3. Lumbar spinal stenosis 4. Mononeuropathy 5. Peripheral neuropathy 6. Lumbar spondylosis 7. Myasthenia Gravis 8. Amyotrophic lateral sclerosis (ALS) 9. Multiple sclerosis 10. Guillain-Barre syndrome 11. Chronic inflammatory demyelinating polyneuropathy (CIDP) 12. Charcot-Marie-Tooth disease	0		12	1) Facioscapulohumeral muscular dystrophy (FSHD): The syndrome of progressive muscular disease from childhood or early adulthood, initially affecting the muscles of the shoulder girdle and face, often asymmetrical, and showing a characteristic pattern of muscle weakness and wasting. The patient's severe scapular winging, left foot drop, asymmetrical shoulder weakness and facial weakness are indic…	1	1	8	1. Lumbar radiculopathy: The patient's presentation of left foot drop, decrease in ankle dorsiflexion, and decreased sensation in his lower extremity, coupled with MRI findings of disk herniation and impingement of the L5 and S1 nerve roots, strongly suggest lumbar radiculopathy. However, there are additional findings (including scapular winging, facial weakness, and shoulder girdle atrophy) whic…	1	4	7	1. Mononeuritis multiplex: This is a type of peripheral neuropathy characterized by damage to two or more separate nerve areas. It could explain the foot drop, decreased vibratory sensation in toes, and facial weakness. However, it is often caused by systemic illnesses such as diabetes, systemic lupus erythematosus or certain infections, which this patient does not appear to have. 2. Lumbar radic…	0		10	1. Lumbar Disc Herniation: The patient's foot drop, loss of pinprick and temperature sensations to the midshins in both legs, as well as decreased vibratory sensation to the ankles are consistent with a left L5-S1 nerve root impairment, which could be due to a large lumbar disc herniation. This is further supported by MRI findings which show these abnormalities. 2. Lumbar Spinal Stenosis: The MRI…	1	5	9		5e-05	Facioscapulohumeral muscular dystrophy	1702	https://www.ncbi.nlm.nih.gov/books/NBK559028/
Case 20-2023	A 52-year-old man with a metastatic solitary fibrous tumor was admitted to this hospital because of recurrent episodes of hypoglycemia. The patient had been in his usual state of health until approximately 1.5 years before the current admission, when dysuria and pain in the lower abdomen and left leg developed after a motor vehicle accident. At another hospital, magnetic resonance imaging (MRI) r…	Differential Diagnosis Dr. Tara E. Soumerai: This 52-year-old man with a solitary fibrous tumor that had metastasized to the lungs, chest, bladder, legs, and retroperitoneum presented with recurrent and refractory hypoglycemia. He had undergone extensive treatment with several chemotherapeutic regimens and radiation therapy, in addition to pelvic tumor resection. He had a history of type 2 diabet…	Doege–Potter syndrome	Please read the following case, and provide a thorough and specific list of differential diagnosis for the underlying cause of this presentation. Please list the diagnosis that most explains all the features of the presentation first, and include rare diagnoses if they are the best explanation for the presentation. "A 52-year-old man with a metastatic solitary fibrous tumor was admitted to this h…	1. Insulinoma 2. Non-islet cell tumor hypoglycemia (NICTH) 3. Paraneoplastic syndrome 4. Liver metastases causing impaired gluconeogenesis 5. Poor oral intake leading to hypoglycemia 6. Medication-induced hypoglycemia (rare but should be considered) 7. Occult sepsis leading to hypoglycemia (unlikely in this case, but should be ruled out) 8. Adrenal insufficiency (Addison's disease) 9. Insulin aut…	1	3	12	1. Insulinoma 2. Non-islet cell tumor hypoglycemia (NICTH) 3. Hormone secreting mesenchymal tumors 4. Factitious hypoglycemia 5. Severe sepsis or septic shock 6. Multiple endocrine neoplasia type 1 7. Igf2-producing tumors 8. Malignant transformation of colonic tubular adenoma 9. Drug-induced hypoglycemia (possibly related to chemotherapy) 10. Reactive hypoglycemia (possibly related to changes in…	1	7	10	1. Insulinoma 2. Non-islet cell tumor hypoglycemia (NICTH) 3. Medication-induced hypoglycemia 4. Sepsis-induced hypoglycemia 5. Liver failure 6. Renal insufficiency 7. Critical illness-related corticosteroid insufficiency 8. Addison's disease 9. Hypopituitarism 10. Paraneoplastic syndrome(s) 11. Factitious hypoglycemia	1	10	11	1. Insulinoma 2. IGF-II-producing tumor (non-islet cell tumor hypoglycemia) 3. Nonislet-cell tumor hypoglycemia (NICTH) due to the solitary fibrous tumor 4. Medullary thyroid carcinoma 5. Adrenal insufficiency causing secondary hypoglycemia 6. Liver dysfunction causing hypoglycemia 7. Cushing's syndrome 8. Alcohol-related hypoglycemia 9. Renal dysfunction causing hypoglycemia 10. Autoimmune hypog…	1	2	10	1. Non-islet cell tumor-induced hypoglycemia (NICTH): The most likely cause of this patient's hypoglycemia is his underlying malignancy known as non-islet cell tumor-induced hypoglycemia (NICTH). NICTH is associated with many types of cancers, but especially large mesenchymal and epithelial tumors. NICTH can be due to increased glucose uptake by the tumor cells, or due to tumor secretion of incom…	1	2	11	1. Non-islet cell tumor hypoglycemia (NICTH): The patient's recurrent hypoglycemia combined with his history of a solitary fibrous tumor with disease progression is suggestive of this condition typically due to ectopic production of IGF-II from the tumor. 2. Insulinoma: Although the patient has no pancreatic involvement and he was not on any hypoglycemic medications, it can still possibly lead to…	1	2	11	1. Non-islet cell tumor hypoglycemia (NICTH): This patient's presentation of low glucose levels with a history of solitary fibrous tumor hints towards NICTH given his symptoms. NICTH is marked by the release of insulin-like growth factor II (IGF-II) from tumors, leading to low glucose. 2. Insulinoma: It is a rare pancreatic tumor that produces high levels of insulin leading to hypoglycemia. Howev…	1	2	9	1) Non-islet cell tumor hypoglycemia (NICTH): Caused by the overproduction of insulin like growth factor II (IGF-II) by malignant cells resulting in hypoglycemia. Patients with NICTH show a pattern of suppressed levels of insulin and IGF-I, and increased levels of IGF-II:IGF-I ratio. As the patient has had hypoglycemic episodes, with a history of metastatic solitary fibrous tumor, this a likely c…	1	2	9		1e-06	Doege–Potter syndrome	106	https://www.ncbi.nlm.nih.gov/pmc/articles/PMC8378376/
Case 21-2023	A 61-year-old man was evaluated in an ophthalmology clinic affiliated with this hospital because of eyelid swelling. Eight years before the current presentation, the patient noticed mild puffiness of the eyelids that was worst in the morning and typically resolved by midday. Five years before the current presentation, the eyelid swelling began to progressively worsen and to last throughout the da…	Differential Diagnosis Dr. Natalie Wolkow: I participated in the care of this patient, and I am aware of the final diagnosis. I evaluated this patient for upper-eyelid blepharoplasty for the treatment of dermatochalasis (excess upper-eyelid skin); however, the clinical examination findings were atypical, prompting further investigation. He had dermatochalasis, but the skin was puffy, edematous, a…	Systemic immunoglobulin light-chain (AL) amyloidosis.	Please read the following case, and provide a thorough and specific list of differential diagnosis for the underlying cause of this presentation. Please list the diagnosis that most explains all the features of the presentation first, and include rare diagnoses if they are the best explanation for the presentation. "A 61-year-old man was evaluated in an ophthalmology clinic affiliated with this h…	1. Graves' Disease 2. Thyroid eye disease 3. Idiopathic orbital inflammation (orbital pseudotumor) 4. Sarcoidosis 5. Wegener's Granulomatosis (Granulomatosis with Polyangiitis) 6. IgG4-related disease 7. Lymphoma 8. Langerhans cell histiocytosis 9. Erdheim-Chester disease 10. Lymphocytic hypophysitis The most likely diagnosis based on the presentation and imaging findings is Graves' Disease or Th…	0		10	1. Thyroid eye disease (Graves' disease) 2. Orbital pseudotumor 3. Sarcoidosis 4. IgG4-related disease 5. Wegener's granulomatosis (granulomatosis with polyangiitis) 6. Lymphoma 7. Langerhans cell histiocytosis 8. Myasthenia gravis 9. Erdheim-Chester disease 10. Tolosa-Hunt syndrome 11. TB or fungal orbital infection 12. Lymphoproliferative disorder Rare diagnoses: 1. Rosai-Dorfman disease 2. Mul…	0		17	1. Thyroid eye disease (Graves' disease): - Eyelid swelling and ptosis - Bilateral enlargement of extraocular muscles - Chemosis and episcleritis - Optic nerve involvement - Increased cup-to-disk ratio in optic nerves 2. Sarcoidosis: - Dorsocervical lipohypertrophy - Bilateral enlargement of extraocular muscles - Perineuritis around optic nerves - Skin thickening and stranding on preseptal eyelid…	0		7	1. Thyroid eye disease (Graves' disease) - most likely explanation given the features of bilateral exophthalmos, orbital fat stranding, and diffuse extraocular muscle enlargement. 2. IgG4-related disease - rare but possible given the diffuse thickening and stranding of the skin on the preseptal eyelids and face, elevated blood IgG and IgG1 levels. 3. Sarcoidosis - possible based on the dorsocervi…	0		7	1. IgG4-related disease: This condition is a fibro-inflammatory disorder characterized by involvement of various systems, including ophthalmic manifestations as observed in this patient including eyelid edema and dermatochalasis. 2. Mucopolysaccharidoses: They are a group of metabolic disorders caused by the absence or malfunctioning of certain enzymes needed to break down molecules called glycos…	1	10	12	1. IgG4-related disease: This condition could cause the swelling in the eyelids and enlargement of extraocular muscles seen in this patient. The elevated IgG2 levels and normal IgG4 levels seen in this patient challenge this diagnosis; however, elevation of any IgG subclass can be seen in IgG4-related disease and IgG4 can be normal in up to 30% of the cases. Additionally, the patient's age and ge…	0		10	1. IgG2 subclass deficiency responsible for eyelid swelling and joint stiffness: A subclass of immunoglobulin G (IgG) deficiency often presents with an increased frequency of infections due to encapsulated bacteria. However, among the different subclasses, IgG2 deficiency is the most common and patients often present with sinopulmonary infections. In this patient, eyelid swelling is a chronic pro…	0		10	1. Localized or generalized amyloidosis: The patient has presented with persistent upper and lower eyelid swelling and ptosis, joint stiffness, and enlargement of the tongue which are all characteristic features of amyloidosis. Furthermore, his imaging studies revealed bilateral enlargement of the extraocular muscles, orbital fat stranding, and thickening and stranding of the skin which is aligne…	1	1	10		1e-05	Systemic immunoglobulin light-chain (AL) amyloidosis.	5554	https://jamanetwork.com/journals/jama/article-abstract/2767867
Case 22-2023	A 59-year-old woman had hypotension and electrocardiographic (ECG) ST-segment abnormalities after the administration of anesthetic agents while she was in the operating room of this hospital. Eighteen weeks before the current presentation, features of acromegaly were observed on routine physical examination by the patient’s primary care provider at another hospital. The blood level of insulin-lik…	Differential Diagnosis Dr. Wilton A. van Klei: This 59-year-old woman with obesity, hypertension, and obstructive sleep apnea presented for transsphenoidal hypophysectomy. A preoperative cardiac evaluation included echocardiography, which revealed a normal ejection fraction, and a pharmacologic stress test, which showed no evidence of ischemia. After the induction of anesthesia, the blood pressur…	Kounis syndrome due to exposure to piperacillin–tazobactam.	Please read the following case, and provide a thorough and specific list of differential diagnosis for the underlying cause of this presentation. Please list the diagnosis that most explains all the features of the presentation first, and include rare diagnoses if they are the best explanation for the presentation. "A 59-year-old woman had hypotension and electrocardiographic (ECG) ST-segment abn…	1. Acromegaly - Given the patient's history of acromegaly, with characteristic physical features, elevated IGF-I levels, and a pituitary adenoma seen on MRI, acromegaly is the most likely underlying cause of the presentation. 2. Coronary Vasospasm - Given the patient's history of coronary vasospasm during the previous surgery, the ECG changes and troponin elevation consistent with myocardial isch…	0		10	1. Stress-induced Takotsubo cardiomyopathy 2. Pheochromocytoma crisis 3. Myocardial infarction 4. Coronary vasospasm 5. Anaphylaxis 6. Acute pulmonary embolism 7. Acute aortic dissection 8. Acute pericarditis 9. Myocarditis 10. Sympathetic surge 11. Acromegaly-induced cardiomyopathy 12. Hypertrophic cardiomyopathy 13. Hypovolemic shock	1	5	13	1. Coronary vasospasm 2. Acromegaly 3. Nonobstructive coronary artery disease 4. Hypotension due to anesthesia 5. Polycystic ovary syndrome 6. Obstructive sleep apnea 7. Prediabetes 8. Rheumatoid arthritis 9. Osteoarthritis 10. Hypertension 11. Scoliosis 12. Leukopenia secondary to hydroxychloroquine 13. Gastrointestinal upset due to meperidine usage 14. Mitral regurgitation 15. Tricuspid regurgi…	0		17	The differential diagnosis for the underlying cause of this presentation includes: 1. Coronary Vasospasm: Given the presentation of ST-segment elevations in the inferior leads and ST-segment depressions and T-wave inversions in the anterior and lateral leads, along with moderate stenosis of the distal left anterior descending coronary artery seen on computed tomographic angiography, coronary vaso…	0		12	1. Coronary vasospasm: This condition could explain the observed ST-segment elevations, and it's known to often occur in the context of anesthesia. It's noteworthy that the patient already had a diagnosis of coronary vasospasm. 2. Non ST-elevation myocardial infarction (NSTEMI): Troponin elevation and ECG changes could suggest myocardial infarction; this occurs when blood supply to the heart is r…	1	6	10	1. Coronary artery vasospasm: This is the most likely diagnosis given the patient's hypotension, and ECG ST-segment changes after the administration of anesthesia. Additionally, the temporal resolution of her ECG findings and subsequent final diagnosis of coronary vasospasm upon further investigation strongly supports this diagnosis. 2. Coronary artery disease: The presentation could be consisten…	0		9	1. Coronary vasospasm might be the cause of the hypotension and ST segment abnormalities in this 59-year-old woman. This condition can be triggered by various factors including anesthesia induction. The patient's moderate stenosis of the distal left anterior descending coronary artery, history of hypertension, obesity, and family history of cardiovascular disease increase her risk for coronary va…	1	6	7	1. Acromegaly due to pituitary adenoma: Clinical signs include features of acromegaly (such as the increase in shoe size, deepening of voice, headaches, arthralgias, oily skin, skin tags, acne), the high IGF-1 and growth hormone levels, and the MRI showing a hypoenhanced area in the pituitary gland. 2. Coronary artery disease: This is suggested by the sustained hypotension, ST-segment changes, an…	0		9		0.0002	Kounis syndrome	737	https://www.researchgate.net/profile/Mucahit-Emet/publication/289339154_A_prospective_study_of_kounis_syndrome_Clinical_experience_and_cardiac_magnetic_resonance_imaging_findings_for_21_patients/links/56981e1608ae34f3cf1f3e1e/A-prospective-study-of-kounis-syndrome-Clinical-experience-and-cardiac-magnetic-resonance-imaging-findings-for-21-patients.pdf
Case 23-2023	A 21-year-old male college student was evaluated in the cardiology clinic at this hospital, before the coronavirus disease 2019 pandemic, because of progressive dyspnea. When the patient was in his early teens, he was evaluated for intermittent exertional dyspnea and received a diagnosis of exercise-induced asthma. Montelukast and an albuterol inhaler were prescribed for use as needed; however, h…	Differential Diagnosis Dr. Bradley A. Maron: This patient has pulmonary hypertension, a distinct clinical diagnosis that is established on the basis of a mean pulmonary arterial pressure of more than 20 mm Hg measured on right heart catheterization.1,2 The clinical presentation, pathophysiological features, and disease course of pulmonary hypertension can vary.3 Patients with pulmonary hypertensi…	Abernathy malformation	Please read the following case, and provide a thorough and specific list of differential diagnosis for the underlying cause of this presentation. Please list the diagnosis that most explains all the features of the presentation first, and include rare diagnoses if they are the best explanation for the presentation. "A 21-year-old male college student was evaluated in the cardiology clinic at this…	1. Eisenmenger syndrome 2. Pulmonary hypertension 3. Idiopathic pulmonary arterial hypertension 4. Congenital heart disease (e.g. atrial septal defect, patent foramen ovale) 5. Chronic thromboembolic pulmonary hypertension 6. Pulmonary veno-occlusive disease 7. Chronic obstructive pulmonary disease 8. Interstitial lung disease 9. Pulmonary fibrosis 10. Sarcoidosis 11. Lymphangitic carcinomatosis …	0		25	1. Pulmonary arterial hypertension (PAH) - This diagnosis best explains the progressive dyspnea, right ventricular enlargement with hypertrophy and severe hypokinesia, right bundle-branch block on ECG, elevated right ventricular systolic pressure, dilated main pulmonary artery, right-to-left shunting patent foramen ovale, and other findings on testing. Other differential diagnoses to consider inc…	0		10	1. Eisenmenger Syndrome 2. Primary Pulmonary Hypertension (idiopathic pulmonary arterial hypertension) 3. Chronic Thromboembolic Pulmonary Hypertension 4. Left-to-Right Shunt (e.g., atrial septal defect, ventricular septal defect) 5. Connective Tissue Disease (e.g., systemic lupus erythematosus) 6. Hereditary Hemorrhagic Telangiectasia 7. Pulmonary Resection for Tuberculosis leading to Pulmonary …	0		10	1. Eisenmenger syndrome 2. Idiopathic pulmonary arterial hypertension 3. Pulmonary veno-occlusive disease 4. Hereditary hemorrhagic telangiectasia (HHT) 5. Pulmonary capillary hemangiomatosis 6. Chronic thromboembolic pulmonary hypertension 7. Systemic lupus erythematosus with pulmonary hypertension 8. HIV-associated pulmonary arterial hypertension 9. Langerhans cell histiocytosis with pulmonary …	0		11	1. Primary Pulmonary Hypertension (PPH): The patient's symptoms, including progressive dyspnea and fatigue during exertion, impaired exercise tolerance, and physical examination findings of elevated jugular venous pressure, RV heave, elevated P2 sound, and systemic oxygen desaturation are all suggestive of right heart failure due to severe pulmonary hypertension. The right heart catheterization f…	0		13	1. Pulmonary hypertension: The echocardiogram and right heart catheterization findings consistent with raised pulmonary pressures, right ventricular hypertrophy, and dilated pulmonary arteries on CT chest heavily suggest this diagnosis. 2. Eisenmenger syndrome: The patient has right-to-left shunting which could be caused by Eisenmenger syndrome. This condition usually manifests in early adulthood…	0		12	1. Eisenmenger syndrome: The right ventricular hypertrophy, interventricular septum flattening, and high right ventricular systolic pressure on echocardiogram, along with the irregular calcification over the right upper quadrant of the chest and liver, right-to-left shunting seen on bubble study, ground-glass nodules, and ventricular enlargement seen on CT scan all suggest a long-standing left-to…	0		10	1. Pulmonary arterial hypertension 2. Chronic thromboembolic pulmonary hypertension: Although a CT scan ruled out acute pulmonary embolism, chronic thromboembolic pulmonary hypertension may cause this degree of right ventricular enlargement and high pressure. 3. Eisenmenger's syndrome: Structural cardiac abnormalities can cause pulmonary hypertension and right-to-left shunting, although a recent …	0		13		3.33333e-05	Abernathy malformation	38	http://dx.doi.org/10.1002/hep.30817
Case 24-2023	A 43-year-old man was evaluated in the multidisciplinary Pulmonary Nodule Clinic of this hospital because of an incidentally found pulmonary nodule. One month before the current evaluation, the patient, who lived in Panama, was seen at a primary care clinic in Colombia for a routine annual physical examination. He was in his usual state of good health, but because of a family history of cancer, h…	Differential Diagnosis Dr. Angela J. Frank: Although I was not directly involved in this patient’s care, I am aware of the final diagnosis in this case. When a pulmonary nodule measuring 6 mm or greater in diameter is either detected on screening or found incidentally, the patient is evaluated by a team in the Pulmonary Nodule Clinic at this hospital, which includes specialists from pulmonology, …	Histoplasmosis	Please read the following case, and provide a thorough and specific list of differential diagnosis for the underlying cause of this presentation. Please list the diagnosis that most explains all the features of the presentation first, and include rare diagnoses if they are the best explanation for the presentation. "A 43-year-old man was evaluated in the multidisciplinary Pulmonary Nodule Clinic …	1. Primary Lung Cancer (most likely explanation given the pulmonary nodule) 2. Metastatic Cancer (if primary cancer is not found) 3. Infection (such as tuberculosis or fungal infection) 4. Sarcoidosis 5. Lymphoma 6. Granulomatosis with Polyangiitis (Wegener's) 7. Pulmonary Langerhans Cell Histiocytosis 8. Eosinophilic Granuloma 9. Pulmonary Hamartoma 10. Pulmonary Metastases from a primary cancer…	0		14	1. Lung cancer - Primary lung cancer is the most likely diagnosis given the presentation of a pulmonary nodule with FDG uptake on PET-CT scan. 2. Tuberculosis - Given the patient's extensive travel history and presence of multiple abnormal lymph nodes, tuberculosis should be considered in the differential. 3. Sarcoidosis - Sarcoidosis can present with pulmonary nodules and lymphadenopathy, and sh…	1	6	11	1. Primary lung cancer (most likely explanation) 2. Metastatic cancer from another primary site 3. Tuberculosis 4. Pulmonary cryptococcosis 5. Sarcoidosis 6. Silicosis 7. Pulmonary histoplasmosis 8. Lymphoma 9. Pulmonary fibrosis 10. Wegener's granulomatosis 11. Bronchiectasis	1	7	11	1. Primary lung cancer (most likely due to the presence of a pulmonary nodule with increased FDG uptake on PET-CT) 2. Metastatic cancer (considering the presence of FDG-avid lymph nodes) 3. Carcinoid tumor (could explain the normal levels of 5-hydroxyindoleacetic acid and chromogranin A, as well as the pulmonary nodule) 4. Tuberculosis (considering the patient's travel history and the presence of…	1	7	12	1. Primary Lung Cancer - This condition would explain the presentation of the pulmonary nodule and the FDG uptake. Given the patient's history of occasional smoking, while not extensive or prolonged, this is still the most concerning diagnosis due to the symptoms. 2. Metastatic Cancer - While the patient does not report any symptoms consistent with primary tumors elsewhere in the body, his family…	1	5	11	1. Lung Cancer: The most likely diagnosis given the history of smoking, the size and the FDG uptake of the nodule, and the accompanying hilar and paratracheal lymphadenopathy. Although there is no obvious weight loss, cough or hemoptysis present (symptoms often associated with lung cancer), it should be considered especially because FDG-PET showed uptake in lung and lymph nodes alike. 2. Metastat…	1	7	10	1. Lung Cancer: The patient has an incidental finding of a pulmonary nodule with FDG uptake, indicating possible malignancy. His history of smoking, even though limited, and a family history of various types of cancer increases his risk. 2. Tuberculosis (TB): Considering the patient's extensive travel history to TB endemic zones and the presence of pulmonary nodules, TB is a possible differential…	0		10	1. Lung Cancer: The patient's imaging findings, family history of cancer, and history of smoking point towards lung cancer as a potential diagnosis. It would specifically be in the differential if the pulmonary nodule demonstrated signs of malignant features. 2. Lung Metastases: Given the family history of various cancers and the patient's age, the detected nodule might represent a metastasis fro…	1	5	11		3e-05	Histoplasmosis	7852	https://www.cdc.gov/fungal/diseases/histoplasmosis/statistics.html
Case 25-2023	An 18-year-old man with the Dravet syndrome was admitted to this hospital because of fever and increased frequency of seizures. The Dravet syndrome, which is caused by a mutation in the gene that encodes the sodium channel α1 subunit (SCN1A), had been diagnosed during evaluation for intractable seizures that had begun when the patient was 6 months of age. He had had developmental delay, was nonve…	Differential Diagnosis Dr. Daniel A. Rauch: This 18-year-old man with the Dravet syndrome began to have low-grade fever and increased frequency of seizures. Two weeks before this admission, treatment with amoxicillin had been started because of mucosal thickening in the paranasal sinuses and secretions seen on imaging in the absence of clinical symptoms of sinusitis. The patient also had a 2-mont…	Multiple vitamin deficiencies, including vitamin C deficiency	Please read the following case, and provide a thorough and specific list of differential diagnosis for the underlying cause of this presentation. Please list the diagnosis that most explains all the features of the presentation first, and include rare diagnoses if they are the best explanation for the presentation. "An 18-year-old man with the Dravet syndrome was admitted to this hospital because…	1. Osteomyelitis: Given the history of bone pain, swelling, warmth, and tenderness of the left foot, as well as the presence of multifocal bone marrow edema on MRI and cortical erosions observed on imaging, osteomyelitis is a likely differential. 2. Septic arthritis: The presence of fractures, bone edema, and cortical erosions, along with the development of purpuric macules, raise the suspicion f…	0		10	1. Osteomyelitis: Given the multifocal bone marrow edema, fractures, and worsening bone edema seen on imaging, osteomyelitis is a likely differential diagnosis. This could be complicated by the Dravet syndrome and immunocompromised state of the patient. 2. Infectious arthritis: The presence of fractures, joint involvement, and purpuric macules could suggest infectious arthritis as a differential …	0		10	1. Osteomyelitis and septic arthritis 2. Sepsis 3. Septic emboli leading to multifocal bone edema and fractures 4. Syndromic osteoporosis 5. Avascular necrosis 6. Chronic recurrent multifocal osteomyelitis (CRMO) 7. Hypertrophic osteodystrophy 8. Leukemia or other hematological malignancy 9. Vasculitis 10. Thrombotic microangiopathy Rare diagnoses that could explain the presentation: - Chronic re…	0		10	1. Osteomyelitis: given the history of swelling, pain, warmth, and previous imaging findings of bone marrow edema and fractures, osteomyelitis is a likely consideration, especially with the worsening clinical course and increased inflammatory markers. 2. Septic arthritis: the presence of fractures and bone erosions, along with purpuric macules on extremities, raises concern for septic arthritis a…	0		8	1. Osteomyelitis: The bone marrow edema found in the foot MRI, along with the persistent swelling, warmth, and tenderness of the foot, may suggest a bone infection even though the blood cultures showed no growth. However, the absence of joint effusion contradicts this diagnosis. The new areas of cortical erosions and intraosseous cystic hemorrhagic foci within the fractures seen on the imaging of…	1	4	6	1. Scurvy: This patient's presentation is highly suggestive of scurvy, given his significant nutritional restrictions, bruising, gum bleeding, fever, fatigue, and bone pain with radiographic changes. Scurvy commonly presents with skin changes such as purpura, swollen/bleeding gums, bone pain, and fatigue due to vitamin C deficiency, which is necessary for collagen synthesis. 2. Osteomyelitis: It …	1	1	7	1. Scurvy: The patient's symptoms including fever, swelling and warmth of the foot, multiple fractures with minimal impact, gingivitis, fatigue, bleeding from the gums and nose, and purpura are all signs of vitamin C deficiency, or scurvy. Additionally, the presence of diffuse bone demineralization and intraosseous cystic hemorrhagic foci within fractures seen on imaging can be a sign of this con…	1	1	9	1. Scurvy: This disease is caused by a deficiency in vitamin C, which would explain the patient's bleeding and erythematous gums, fractures, bruising, swelling of his left foot, and purpuric macules on his skin. Vitamin C is needed for collagen synthesis, which is affecting the patient's bones and skin lesions. The patient's ketogenic formula diet and worsened gingivitis could have put him at ris…	1	1	10		0.05	Vitamin C deficiency	6365	https://academic.oup.com/jalm/article/8/2/272/6967020
Case 26-2023	A 15-year-old girl was admitted to this hospital because of abdominal pain and an ovarian mass. The patient had been in her usual state of health until 6 weeks before the current presentation, when lower abdominal pain developed along the midline. The pain was sharp and crampy, increased with movement, and decreased with lying down. During the next 24 hours, the pain shifted from the midline to t…	Differential Diagnosis Dr. Andrea L. Zuckerman: Six weeks before the current presentation, sharp, crampy abdominal pain developed in this otherwise healthy 15-year-old girl. Evaluation at another emergency department revealed leukocytosis. Transabdominal ultrasonography revealed a complex, thick-walled cyst in the right ovary, at the site where the patient’s pain was most prominent. A presumptive…	Juvenile granulosa-cell tumor	Please read the following case, and provide a thorough and specific list of differential diagnosis for the underlying cause of this presentation. Please list the diagnosis that most explains all the features of the presentation first, and include rare diagnoses if they are the best explanation for the presentation. "A 15-year-old girl was admitted to this hospital because of abdominal pain and an…	1. Ovarian tumor (most likely germ cell tumor, granulosa cell tumor, or sex cord-stromal tumor) 2. Ovarian torsion 3. Endometriosis 4. Ectopic pregnancy 5. Pelvic inflammatory disease 6. Ovarian hyperstimulation syndrome 7. Tubo-ovarian abscess 8. Appendicitis 9. Meigs syndrome 10. Polycystic ovary syndrome 11. Hydrosalpinx 12. Adenomyosis 13. Ovarian fibroma 14. Ovarian vein thrombosis 15. Non-g…	1	16	20	1. Ovarian cancer - this is the most likely diagnosis given the presentation of abdominal pain, pelvic mass, and ascites. Ovarian cancer can present with vague symptoms and can mimic other conditions like ruptured ovarian cyst. 2. Borderline ovarian tumor - a rare type of ovarian tumor that can present with symptoms similar to ovarian cancer. It is less aggressive but still requires treatment. 3.…	1	1	10	1. Ovarian tumor (ovarian germ cell tumor, ovarian epithelial tumor, ovarian sex cord-stromal tumors) 2. Ovarian torsion 3. Pelvic inflammatory disease 4. Endometrioma 5. Ectopic pregnancy 6. Appendicitis 7. Ovarian cyst 8. Adnexal cyst 9. Ovarian abscess 10. Ovarian fibroma 11. Meigs syndrome Rare diagnoses: 1. Granulosa cell tumor 2. Dysgerminoma 3. Ovarian carcinosarcoma 4. Krukenberg tumor 5.…	1	1	16	The most likely differential diagnosis for the underlying cause of this presentation is: 1. Ovarian Teratoma (Dermoid cyst) with possible torsion: This could explain the heterogeneous, thick-walled mass originating from the right ovary, the presence of ascitic fluid, and the development of symptoms after physical exertion. Other potential differential diagnoses include: 2. Ovarian neoplasm (such …	1	2	8	1. Ovarian cyst (including ruptured cyst): This is a common condition in adolescents and could explain the imaging findings as well as the pain, which is especially severe with a ruptured cyst. However, the large size of the mass, slow increase over time, and some of the specific imaging findings (including the heterogeneous nature of the mass and the ascitic fluid) make this less likely. 2. Ovar…	1	4	10	1. Malignant Ovarian Tumor: The presence of a large complex ovarian mass with normal vascular flow along with the patient's age and symptoms makes ovarian malignancy the primary likelihood. The further presence of ascites increases suspicion of a malignancy. Possible tumor types given her age might include dysgerminoma, yolk sac tumor, or immature teratoma. 2. Benign Ovarian Tumor: This could inc…	1	1	8	1. Ovarian malignancy: Given the presence of a large, heterogeneous mass and pelvic ascites, an ovarian tumor, such as a germ cell tumor (teratoma, dysgerminoma) could be a probable cause. The age of presentation and her signs and symptoms are consistent with such a diagnosis. 2. Ovarian torsion: This is a condition is due to the rotation of the ovary on its ligamentous supports, which leads to i…	1	1	7	1. Ovarian Cyst: The patient's worsening pain, gradual increase in abdominal girth, age, and ultrasound findings are suggestive of an ovarian cyst, likely a large ovarian cyst. 2. Ovarian Torsion: This can present with pain, a large ovarian mass, and increasing abdominal girth. However, Doppler findings did not show any compromised blood flow to the ovary which is typical in torsion. Therefore, t…	1	3	10		1e-06	Juvenile granulosa-cell tumor	474	https://www.ncbi.nlm.nih.gov/pmc/articles/PMC10040497 https://obgyn.onlinelibrary.wiley.com/doi/full/10.1111/aogs.14189
Case 27-2023	A 53-year-old woman with celiac disease was transferred to the intensive care unit (ICU) of this hospital for the management of upper gastrointestinal bleeding with hemorrhagic shock. The patient had been in her usual state of health until approximately 3 weeks before the current presentation, when fatigue, malaise, anorexia, generalized weakness, and watery diarrhea developed. Two weeks later, t…	Differential Diagnosis Dr. Nikroo Hashemi: This 53-year-old woman with celiac disease, who was not following a gluten-free diet, had appeared well until 3 weeks before the current presentation, when she began to have a large volume of watery diarrhea. After 2 weeks, the diarrhea became bloody, and she was admitted to another hospital. She was found to be in hemorrhagic shock and received intensiv…	Turner syndrome associated with celiac disease, hepatic steatosis, portosinusoidal vascular disorder, and paraganglioma and schwannoma	Please read the following case, and provide a thorough and specific list of differential diagnosis for the underlying cause of this presentation. Please list the diagnosis that most explains all the features of the presentation first, and include rare diagnoses if they are the best explanation for the presentation. "A 53-year-old woman with celiac disease was transferred to the intensive care uni…	1. Dieulafoy lesion: This rare condition involves an abnormally large artery that erodes through the mucosa of the gastrointestinal tract, leading to severe bleeding. It can present with acute upper gastrointestinal bleeding and can be missed on initial endoscopic evaluation. The presence of a pulsatile vascular lesion in the distal esophagus with active bleeding could be indicative of a Dieulafo…	0		12	1. Hereditary Hemorrhagic Telangiectasia (Osler-Weber-Rendu syndrome): This rare genetic disorder can present with epistaxis, mucocutaneous telangiectasias, and arteriovenous malformations in various organs, including the gastrointestinal tract. Patients can develop gastrointestinal bleeding and have a family history of similar symptoms. 2. Vasculitis: Conditions like Granulomatosis with Polyangi…	0		12	1. Most likely diagnosis: Gastrointestinal angiodysplasia as the patient presents with upper gastrointestinal bleeding, esophageal varices, esophagitis, and an esophageal varix with an overlying fibrin plug. 2. Differential Diagnosis: - Osler-Weber-Rendu Syndrome (Hereditary Hemorrhagic Telangiectasia): A rare autosomal dominant disorder characterized by abnormal blood vessel formation, leading t…	1	3	12	1. Amyloidosis: Amyloidosis is a rare but possible diagnosis given the patient's history of celiac disease and the presence of a retroperitoneal mass, esophageal varices, and potentially cardiac involvement. 2. Graft-versus-host disease: Given the patient's history of celiac disease and intestinal symptoms, graft-versus-host disease is a consideration, especially if she has undergone a bone marro…	0		10	1. Cirrhosis secondary to celiac disease: This condition is the common cause of upper gastrointestinal bleeding as seen in the patient. Her blood tests show abnormal liver function tests (mildly raised bilirubin, alanine aminotransferase, and aspartate aminotransferase, significantly raised alkaline phosphatase), hypoalbuminemia which might have led to ascites. There are also indications of encep…	1	1	22	1. Gastrointestinal malignancy (such as pancreatic or gastric cancer): This is highly possible due to the presence of a heterogeneous mass near the pancreatic tail, unexplained weight loss, gastrointestinal bleeding, and her family history of pancreatic and colon cancer. 2. Cirrhosis of the liver: The patient has hepatic steatosis, ascites, elevated INR, and low albumin which are all suggestive o…	1	3	10	1. Portal Hypertension: This patient's symptoms of variceal bleeding, splenomegaly, ascites, and esophageal varices seen on CT angiography strongly suggest portal hypertension as the primary diagnosis. Her cirrhotic-appearing liver also raises concern for possible liver cirrhosis which is a major cause of portal hypertension. 2. Autoimmune Hepatitis: Given the patient's known celiac disease, whic…	0		12	1. Severe bleeding esophageal varices secondary to liver cirrhosis: The patient's presentation of gastrointestinal bleeding, ascites, and esophageal varices are classical signs of liver cirrhosis. Cirrhosis can result in abnormal coagulation due to reduced hepatic synthesis of clotting factors, explaining the elevated INR. This diagnosis could explain the patient's anemia, gastrointestinal bleedi…	1	7	7		0.0005	Turner syndrome	12057	https://www.ncbi.nlm.nih.gov/books/NBK554621/
Case 28-2023	A 37-year-old man was admitted to this hospital because of a rash. The patient had been well until 9 days before this admission, when a diffuse rash developed on the hands and feet. During the next 3 days, the rash spread proximally to the arms and the legs, then extended to the groin, trunk, and face. Six days before this admission, the patient noticed new throat tightness and lip swelling. Thre…	Differential Diagnosis Dr. Frank M. Volpicelli: This 37-year-old man had a 9-day history of a progressive, maculopapular rash involving the palms of the hands and soles of the feet (without desquamation), as well as moderate systemic symptoms and an elevated globulin gap (the difference between the total protein level and the total albumin level). In constructing a differential diagnosis, I will …	Human immunodeficiency virus type 1 infection and syphilis	Please read the following case, and provide a thorough and specific list of differential diagnosis for the underlying cause of this presentation. Please list the diagnosis that most explains all the features of the presentation first, and include rare diagnoses if they are the best explanation for the presentation. "A 37-year-old man was admitted to this hospital because of a rash. The patient ha…	1. Stevens-Johnson Syndrome (SJS) or Toxic Epidermal Necrolysis (TEN) - Most likely diagnosis due to the mucosal involvement, escalating rash with painful and itchy skin, and symptoms of tightness in the throat, difficulty swallowing and breathing. 2. Acute generalized exanthematous pustulosis (AGEP) - Rare but possible diagnosis given the diffuse rash with skin involvement on hands, feet, trunk,…	0		10	1. Stevens-Johnson Syndrome/Toxic Epidermal Necrolysis (SJS/TEN) 2. Drug Reaction with Eosinophilia and Systemic Symptoms (DRESS) Syndrome 3. Acute Generalized Exanthematous Pustulosis (AGEP) 4. Hypersensitivity Vasculitis 5. Acute Autoimmune Urticaria/Angioedema 6. Acute Lupus erythematosus 7. Erythema multiforme 8. Pemphigus vulgaris 9. Graft-versus-host disease 10. Acute exacerbation of atopic…	0		13	1. Acute generalized exanthematous pustulosis (AGEP) 2. Drug reaction with eosinophilia and systemic symptoms (DRESS) 3. Stevens-Johnson syndrome (SJS)/Toxic epidermal necrolysis (TEN) 4. Serum sickness 5. Acute urticaria 6. Erythema multiforme 7. Acute Generalized Morbilliform Eruption 8. Acute febrile neutrophilic dermatosis (Sweet syndrome) 9. Kawasaki disease 10. Pemphigus vulgaris Rare diagn…	0		13	1. Stevens-Johnson syndrome/toxic epidermal necrolysis 2. Adult Still's disease 3. Drug reaction with eosinophilia and systemic symptoms (DRESS syndrome) 4. Erythema multiforme 5. Behcet's disease 6. Acute lupus erythematosus 7. Secondary syphilis 8. Acute HIV infection 9. Kawasaki disease 10. Toxic shock syndrome Rare Diagnoses: 1. Acute generalized exanthematous pustulosis (AGEP) 2. Acute febri…	1	8	12	1. Multisystem Inflammatory Syndrome in Adults (MIS-A): This syndrome has been reported in adults following Covid-19 infection and may occur after Covid-19 vaccination, and would particularly explain the rash, gastrointestinal symptoms, lip swelling, lymphadenopathy, and elevated inflammatory markers. 2. Drug reaction with eosinophilia and systemic symptoms (DRESS) syndrome: This is a severe drug…	1	3	10	1. Vaccine-induced hypersensitivity reaction: In this case, the patient experienced the onset of rash and swelling around one day following his COVID-19 mRNA vaccine administration. His presentation of diffuse rash, throat tightness, lip swelling, difficulty swallowing, and shortness of breath are symptoms suggestive of a severe allergic reaction or hypersensitivity response. 2. Steven-Johnson Sy…	1	7	8	1. Drug Reaction with Eosinophilia and Systemic Symptoms (DRESS) Syndrome: The patient's symptoms started following the administration of an mRNA-based Covid-19 vaccine. Though rare, vaccines have been reported to cause DRESS. It presents with rash, facial swelling, and systemic symptoms like fever, lymphadenopathy, and involvement of internal organs, though this patient's organ functioning tests…	1	4	12	1. Drug reaction with eosinophilia and systemic symptoms (DRESS): This condition typically presents 2 to 6 weeks after exposure to a drug, often with rash, lymphadenopathy, and internal organ involvement (e.g., hepatic, renal, cardiac, or pulmonary). In this case, the timeline following the COVID-19 vaccine is suggestive of DRESS and the presence of rash, lymphadenopathy, and systemic symptoms (e…	1	4	7		0.0001	Human immunodeficiency virus type 1 infection and syphilis	809	https://www.cdc.gov/hiv/library/reports/hiv-surveillance/vol-28-no-3/content/national-profile.html
Case 29-2023	A 34-year-old woman with a history of end-stage liver disease due to alcohol use disorder was admitted to this hospital because of abdominal distention, fatigue, and acute kidney injury that occurred 10 months after orthotopic liver transplantation. Two weeks before the current admission, fatigue, weakness, and anorexia developed, along with associated myalgias and night sweats. Three days before…	Differential Diagnosis Dr. Sundar Jagannath: This 34-year-old woman had a history of alcoholic hepatitis that was complicated by cirrhosis with ascites. Hepatorenal syndrome developed, and she was treated with renal replacement therapy followed by liver transplantation. Her post-transplantation course was complicated by multiple infections, for which she received antibiotics. The current hospital…	Plasma cell myeloma (multiple myeloma).	Please read the following case, and provide a thorough and specific list of differential diagnosis for the underlying cause of this presentation. Please list the diagnosis that most explains all the features of the presentation first, and include rare diagnoses if they are the best explanation for the presentation. "A 34-year-old woman with a history of end-stage liver disease due to alcohol use …	Based on the history and clinical presentation described in the case, the most likely differential diagnosis for the underlying cause of this patient's presentation is: 1. Post-transplant lymphoproliferative disorder (PTLD) Other possible differential diagnoses to consider include: 2. Lymphoma 3. Infectious colitis 4. Bacterial peritonitis 5. Cytomegalovirus (CMV) infection 6. Ischemic colitis 7.…	0		14	1. Spontaneous bacterial peritonitis (SBP) - Given the history of cirrhosis, ascites, and acute kidney injury, SBP is the most likely diagnosis, especially with a positive Clostridioides difficile toxin test. The patient's presentation of hypotension, abdominal distention, and diarrhea is consistent with SBP. 2. Recurrent or persistent bacterial infections - Given the patient's history of vancomy…	1	8	11	1. Spontaneous Bacterial Peritonitis (most likely explanation for abdominal distention, ascites, acute kidney injury, hypotension, and shift in dullness) Rare Differentials: - Peritoneal Carcinomatosis (considering the FDG-avid peritoneal masses on PET-CT) - Lymphoma involving the peritoneum - Ascitic fluid neoplastic infiltration (considering the atypical cells in ascitic fluid) - Myeloma involv…	1	15	15	a. Spontaneous Bacterial Peritonitis (SBP): Given the patient's history of liver disease, ascites, recent liver transplantation, abdominal distention, and positive Clostridioides difficile toxin, SBP is the most likely explanation for the presentation. b. CMV infection: The patient's history of CMV viremia, immunosuppressive therapy post-transplant, and multifocal peritoneal masses on PET-CT rais…	1	8	10	1. Graft-versus-host disease: This is a condition that might occur after an allogeneic transplant. The donated bone marrow or peripheral blood stem cells view the recipient's body as foreign, and the donated cells/bone marrow attack the body. Given the patient's recent liver transplantation, persistent fatigue, watery diarrhea, and abnormal ascitic fluid analysis, this condition might be consider…	1	2	9	1. Primary: Post-transplant lymphoproliferative disease (PTLD) The patient's symptoms and results suggest a possible diagnosis of post-transplant lymphoproliferative disease (PTLD). PTLD is a complication that can occur after an organ transplant, due to an uncontrolled growth of lymphocytes caused by immunosuppression, which is a part of the care plan after organ transplantation to prevent transp…	1	5	8	1. Clostridioides Difficile Infection: The watery diarrhea along with positive testing for C. diff toxin in stool confirms this. However, it doesn’t explain all the symptoms, particularly ascites and blood abnormalities, as well as the fatigue and weight loss. 2. Sepsis: Given her low blood pressure and elevated heart rate, as well as general malaise and history of hospital visits, this patient m…	1	5	9	1. Post-transplant Lymphoproliferative disorder (PTLD): This patient's history of significant immunosuppression secondary to her orthotopic liver transplantation, eventual recovery of lymphocytic atypia, EBV and CMV positivity, weight loss, fatigue and night sweats make this a potential diagnosis. The PET-CT findings of multifocal FDG-avid masses, and diffuse uptake could also hint to lymphadenop…	1	1	9		2e-05	Plasma cell myeloma	62308	https://www.thelancet.com/journals/lanhae/article/PIIS2352-3026(22)00165-X/abstract
Case 30-2023	A 50-year-old woman was admitted to this hospital because of confusion. The patient had been in her usual state of health until 5 months before the current presentation, when dysphagia developed. One month later, she was evaluated by her primary care physician. She reported having a sensation that pills and food were getting stuck in her throat when she swallowed. She was unable to take her medic…	Differential Diagnosis Dr. Amulya Nagarur: This 50-year-old woman with a history of Roux-en-Y gastric bypass, ulcerative colitis, bipolar disorder, and seizure disorder initially presented with malnutrition and anasarca and then had rapidly progressive encephalopathy. A review of the background, midground, and foreground of her presentation will inform the selection of “illness scripts” to consid…	Noncirrhotic hyperammonemia after Roux-en-Y gastric bypass.	Please read the following case, and provide a thorough and specific list of differential diagnosis for the underlying cause of this presentation. Please list the diagnosis that most explains all the features of the presentation first, and include rare diagnoses if they are the best explanation for the presentation. "A 50-year-old woman was admitted to this hospital because of confusion. The patie…	1. Wernicke encephalopathy: Given the history of inadequate nutritional intake, thiamine deficiency could lead to the neurological symptoms seen in this patient. 2. Hepatic encephalopathy: Presence of hepatic steatosis on imaging, abnormal liver function tests, and subsequent altered mental status could be indicative of hepatic encephalopathy. 3. Sepsis: Elevated white cell count, positive urine …	0		10	1. Wernicke's Encephalopathy 2. Hepatic Encephalopathy 3. Hyperammonemia 4. Sepsis-induced encephalopathy 5. Cerebral venous thrombosis 6. Anoxic brain injury 7. Wilson's Disease 8. Thiamine deficiency (due to chronic alcohol use or malnutrition) 9. Porphyria 10. Uremic encephalopathy	1	3	10	1. Wernicke's encephalopathy: Given the patient's history of chronic back pain, bipolar disorder, seizure disorder, and ulcerative colitis, along with her significant weight loss, gastrointestinal symptoms, and vitamin deficiencies, Wernicke's encephalopathy due to thiamine deficiency is a likely differential diagnosis. This is further supported by the patient's unsteady gait, confusion, and slur…	0		10	1. Wernicke encephalopathy: Given the history of chronic back pain, seizure disorder, confusion, cognitive impairment, ataxia, and low levels of thiamine, this diagnosis is highly suspicious. Wernicke encephalopathy is a neurological disorder resulting from thiamine deficiency, commonly seen in patients with chronic alcohol use disorder but can also occur in other conditions with malnutrition. 2.…	0		10	Differential diagnosis for this case could include the following: 1. Severe malnutrition and micronutrient deficiencies: Given the long history of dysphagia and reduced food intake (even with implementation of dietary supplements), malnutrition is a very likely diagnosis. The patient shows signs of deficiencies in zinc, selenium, vitamin A, vitamin C, and vitamin B6, which can cause a variety of …	0		10	1. Metabolic encephalopathy due to severe malnourishment. The patient has a history of weight loss, altered mental status, and lab results indicating deficiencies in various vitamins and minerals, including zinc, selenium, vitamin A, and vitamin C, which could contribute to confusion and altered mental status. 2. Hepatic encephalopathy, which could be suggested by the patient's altered mental sta…	0		13	1. Hepatic encephalopathy: This condition is marked by an altered mental status that is associated with liver failure. Patients may experience confusion, lethargiciness, and myoclonic jerks. Her long-term smoking habit, the presence of fatty infiltration in the liver, rapid weight loss, pitting edema, and the increase in zinc levels are suggestive of liver disease that may lead to encephalopathy.…	0		10	1) Vasculitis: The patient has various symptoms - confusion, weight loss, dysphagia, edema, hypoalbuminemia, decreased zinc and selenium levels, and fatty liver infiltration - that may be due to systemic vasculitis; imaging also shows abnormal enhancement and edema in the bowel. 2) Metabolic Encephalopathy: The patient's confusion and myoclonic jerking movements, along with hypoalbuminemia, could…	0		11		1e-06	Hyperammonemia after Roux-en-Y gastric bypass.	22	Case report / case series only: https://onlinelibrary.wiley.com/doi/10.1002/oby.21037
Case 31-2023	A 79-year-old man was admitted to this hospital because of involuntary movements on the left side and transient unresponsiveness. The patient had been in his usual state of health until 9 months before admission, when involuntary movements of the left shoulder and left side of the face developed. The movements were described by the patient as twitching, were not associated with a change in the le…	Differential Diagnosis Dr. Albert Y. Hung: This 79-year-old man initially presented with involuntary movements of the left shoulder and face without associated loss of consciousness. Diagnosis of an unusual movement disorder, especially one that is present episodically, can be challenging. Videos brought in by the patient can be very useful.1 Most movement disorders result from abnormal functioni…	Limb-shaking transient ischemic attacks	Please read the following case, and provide a thorough and specific list of differential diagnosis for the underlying cause of this presentation. Please list the diagnosis that most explains all the features of the presentation first, and include rare diagnoses if they are the best explanation for the presentation. "A 79-year-old man was admitted to this hospital because of involuntary movements …	1. Ischemic stroke due to severe stenosis of the distal right common carotid artery, extending into the proximal right internal carotid artery 2. Functional neurologic disorder 3. Seizure disorder 4. Hypoglycemia 5. Vitamin B12 deficiency 6. Movement disorder 7. Anti-NMDA receptor encephalitis 8. Creutzfeldt-Jakob disease 9. Autoimmune encephalitis 10. Metabolic encephalopathy	1	1	10	1. Functional neurologic disorder 2. Stroke 3. Hyponatremia 4. Seizure disorder 5. Thyroid disorder 6. Metabolic disorder 7. Multiple system atrophy 8. Hereditary chorea 9. Huntington's disease 10. Wilson's disease 11. Normal pressure hydrocephalus 12. Creutzfeldt-Jakob disease 13. Neurosyphilis 14. Autoimmune encephalitis 15. Frontotemporal dementia 16. Paraneoplastic syndrome 17. Neurodegenerat…	1	20	20	Possible differential diagnosis for the underlying cause of this presentation includes: 1. Transient Ischemic Attack (TIA): Given the patient's history of severe carotid artery stenosis and episodes of involuntary movements followed by transient unresponsiveness, a TIA should be considered as a possible diagnosis. 2. Functional Neurologic Disorder: The patient's abnormal movements that respond to…	1	1	10	1. Functional Neurological Disorder 2. Stroke 3. Transient Ischemic Attack 4. Seizure Disorder 5. Psychogenic Movement Disorder 6. Thyroid Storm 7. Multiple Sclerosis 8. Parkinson's Disease 9. Wilson's Disease 10. Creutzfeldt-Jakob Disease 11. Neurosyphilis 12. Hereditary Spastic Paraplegia 13. Progressive Supranuclear Palsy 14. CADASIL (Cerebral Autosomal Dominant Arteriopathy with Subcortical I…	1	3	18	1. Functional Neurologic Disorder (Conversion Disorder): This diagnosis is most consistent with the history of recurrent transient symptoms, normal diagnostic imaging, and distraction techniques relieving symptoms. 2. Seizure disorder: The patient's symptoms might be due to some kind of seizure disorder, although the lack of abnormal findings on EEG and lack of response to antiepileptic drugs mak…	1	3	11	1. Seizure disorder: The patient's presentation of involuntary movements are in keeping with a seizure disorder. This condition is characterized by varying degrees of loss of awareness during an episode. The abnormal movements are often mild at onset and can gradually increase over time. However, EEG was normal with no epileptiform abnormalities present and magnetic resonance imaging (MRI) of the…	1	3	12	1. Functional Neurologic Disorder (Conversion Disorder): This diagnosis is supported by the patient's history of anxiety and abnormal movements that were alleviated by distraction techniques. 2. Partial Seizures / Epilepsy: The patient initially presented with involuntary movements that were thought to be seizures and displayed focal EEG slowing. 3. Cerebrovascular Disease / Stroke: The man's sym…	1	3	12	1. Functional Neurological Disorder (Conversion Disorder): The patient's episodes of involuntary movements and transient unresponsiveness, which improved with distraction, highly suggest a functional or conversion disorder. The features of functional neurologic disorder are involuntary neurologic symptoms that are inconsistent with neurologic disease but consistent with a normal pattern of moveme…	1	3	11		1e-06	Limb-shaking transient ischemic attacks	96	Case reports only: https://pubmed.ncbi.nlm.nih.gov/37839077/
Case 32-2023	A 62-year-old woman was evaluated at this hospital because of recurrent hemorrhagic pericardial effusion. The patient had been in her usual state of health until 3 months before the current admission, when pleuritic pain and tightness in her chest developed suddenly while she was eating. The chest pain persisted and began to radiate to the neck and back. The symptoms did not abate with aspirin or…	Differential Diagnosis Dr. Evin Yucel: This 62-year-old woman, with a history of laparoscopic sleeve gastrectomy, a complicated abdominoplasty, and percutaneous transcatheter closure of a fenestrated ASD, presented with recurrent symptomatic hemorrhagic pericardial effusion. Her presentation was subacute, with evidence of the physiologic characteristics of tamponade on TTE. CARDIAC TAMPONADE Card…	Amplatzer septal occluder device erosion.	Please read the following case, and provide a thorough and specific list of differential diagnosis for the underlying cause of this presentation. Please list the diagnosis that most explains all the features of the presentation first, and include rare diagnoses if they are the best explanation for the presentation. "A 62-year-old woman was evaluated at this hospital because of recurrent hemorrhag…	1. Recurrent hemorrhagic pericardial effusion 2. Pericarditis 3. Aneurysm of the ascending aorta 4. Neoplastic disease (primary or metastatic pericardial tumors) 5. Chronic pericardial effusion 6. Idiopathic pericardial effusion 7. Tuberculous pericarditis 8. Dressler syndrome (post-myocardial infarction syndrome) 9. Eosinophilic myocarditis 10. Quincke pulse 11. Post-traumatic pericardial effusi…	1	1	14	1. Cardiac tamponade: - Recurrent hemorrhagic pericardial effusion - Pleuritic chest pain radiating to neck and back - Symptoms worsen with exertion and in supine position - Tachypnea and dizziness with exertion - Pericardial friction rub - TTE showing pericardial effusion and features of tamponade 2. Pulmonary embolism: - Pleuritic chest pain - Dyspnea - History of postoperative pulmonary emboli…	1	1	14	1. Most likely diagnosis that explains all the features of the presentation: - Recurrent hemorrhagic pericardial effusion secondary to postoperative complications from a transcatheter closure of atrial septal defect (ASD) with an interatrial septal aneurysm. 2. Differential diagnoses: - Acute coronary syndrome (ACS) presenting as ST-segment elevation and T-wave inversion on ECG. - Infectious peri…	1	1	14	1. Dressler syndrome: This autoimmune phenomenon can present with recurrent pericardial effusion, chest pain, and pleuritic symptoms. It often occurs post-injury or post-surgery. 2. Rheumatoid arthritis: Rheumatoid arthritis can present with pericardial effusion and joint symptoms like pleuritic pain. 3. Systemic lupus erythematosus: SLE can present with recurrent pericardial effusion, pleuritic …	0		10	1. Pericarditis (likely autoimmune, as evidenced by elevated antinuclear antibody titer): This patient’s presentation of pericardial effusion with accompanying chest pain and tachycardia, in the absence of infection or malignancy, is suggestive of pericarditis. The presence of elevated antinuclear antibodies could suggest an autoimmune etiology. Additionally, her response to colchicine and ibupro…	0		6	The presentation is indicative of hemorrhagic pericardial effusion with recurrent episodes of chest pain, exacerbated by supine position and exertion, accompanying dizziness, tachycardia, elevated jugular venous pressure, pericardial friction rub, pulsus paradoxus and evidence of right-sided heart compromise on imaging. This is also related to recurrent episodes of dyspnea and cough. Based on thi…	1	1	10	1. Pericardial injury or inflammation due to the presence of septal occluder device: The device is near to the aortic root and could potentially be causing localized injury or inflammation, leading to pericardial effusion. Device erosion, though it wasn't seen in the CT scan, is still a possible differential diagnosis. 2. Autoimmune or connective tissue disease: Although the rheumatoid factor is …	1	1	6	1. Pericardial Malignancy: Malignant infiltration of the pericardium may result in recurrent hemorrhagic pericardial effusion. It remains one of the leading differentials, given the persistence despite therapy. Primary pericardial malignancies are extremely rare, but secondary spread sometimes arises from malignancies of lung, breast, melanoma and lymphomas. 2. Dressler Syndrome (Post-MI Syndrome…	1	5	10		9.99997e-07	Amplatzer septal occluder device erosion.	151	https://www.jacc.org/doi/10.1016/j.jacc.2021.08.082 https://www.ahajournals.org/doi/full/10.1161/circinterventions.116.004212
Case 33-2023	An 86-year-old man was admitted to this hospital because of shortness of breath. The patient had been in his usual state of health until 6 months before the current admission, when he began to have shortness of breath that occurred intermittently during his daily walk of 1 to 2 miles. Ten weeks before the current admission, posterior lumbar decompression was performed for the treatment of spinal …	Differential Diagnosis Dr. Sushil Allen Luis: This 86-year-old man was admitted to the hospital because of progressive shortness of breath and hypoxemia. He was found to have tricuspid and pulmonic valvular disease and a PFO with right-to-left shunting. PULMONARY EMBOLISM When the patient presented to the emergency department 3 weeks before the current admission, he had shortness of breath that h…	Carcinoid heart disease due to a metastatic well-differentiated neuroendocrine tumor (carcinoid tumor) associated with carcinoid syndrome.	Please read the following case, and provide a thorough and specific list of differential diagnosis for the underlying cause of this presentation. Please list the diagnosis that most explains all the features of the presentation first, and include rare diagnoses if they are the best explanation for the presentation. "An 86-year-old man was admitted to this hospital because of shortness of breath. …	The most likely diagnosis that explains all the features of this patient's presentation is suspected pulmonary arterial hypertension (PAH) with an underlying etiology such as chronic thromboembolic pulmonary hypertension (CTEPH), given the history of progressive dyspnea, bilateral leg edema, weight loss, dizziness, and frequent coughing when lying down. The presence of right heart failure signs a…	0		6	1. Heart Failure with Reduced Ejection Fraction (Heart Failure) 2. Myocarditis 3. Primary Pulmonary Hypertension 4. Chronic Thromboembolic Pulmonary Hypertension 5. Atrial Fibrillation with Rapid Ventricular Response 6. Chronic Obstructive Pulmonary Disease (COPD) 7. Sarcoidosis 8. Diffuse Alveolar Hemorrhage 9. Infiltrative Lung Disease (such as Idiopathic Pulmonary Fibrosis) 10. Acute Respirato…	0		10	1. Pulmonary veno-occlusive disease - The presentation of dyspnea with exercise intolerance, pleural effusions, ground-glass opacities on imaging, and elevated NT-proBNP levels can be seen in pulmonary veno-occlusive disease. This rare condition is characterized by progressive pulmonary hypertension and diffuse pulmonary edema due to occlusion of small veins in the lungs. 2. Pulmonary capillary h…	0		10	1. Chronic thromboembolic pulmonary hypertension (CTEPH): Given the patient's history of recent surgery, presence of dyspnea, elevated d-dimer, and dilated right atrium and ventricle on imaging, CTEPH should be considered as the most likely diagnosis. 2. Cardiac sarcoidosis: The presence of bilateral subpleural nodules on imaging, along with cardiac involvement (right ventricular dilatation, tric…	0		8	1. Pulmonary hypertension: The patient's symptoms of shortness of breath, elevated d-dimer, enlarged right heart structures on CT and ECG findings of right bundle-branch block along with echocardiographic evidence of right heart strain (right ventricular dilation, right atrial dilation, PFO with right-to-left shunting, estimated elevated right ventricular systolic pressure) strongly suggest this.…	1	2	7	1. Carcinoid heart disease: This is the most likely diagnosis considering the clinical presentation, bronchial tree changes seen on CT, and the changes seen on TTE. Carcinoid tumors secrete serotonin which causes thickening and retraction of right heart valves, leading to stenosis and regurgitation, as seen in this patient. The patient also has diarrhea which can be a symptom of carcinoid syndrom…	1	1	14	1. Carcinoid syndrome: Carcinoid syndrome can lead to right-sided heart disease (valvular damage) that explains patient's symptoms including shortness of breath, right atrial and ventricular enlargement, tricuspid regurgitation, and pulmonary valve thickening seen on the TTE. The brochospasm can cause cough and the diarrhea could be due to hypersection of 5-HT. The weight loss might be due to mal…	1	1	6	1. Pulmonary Hypertension: This condition could explain the patient's worsening shortness of breath, right atrium and ventricle dilation, high d-dimer level, and prominent c-v wave. Furthermore, the diagnosis is supported by his echocardiogram showing a right ventricular volume overload, severe tricuspid regurgitation, moderate pulmonic regurgitation, and a patent foramen ovale with right-to-left…	1	4	8		4e-06	Carcinoid heart disease	940	https://www.ncbi.nlm.nih.gov/pmc/articles/PMC1768473/
Case 34-2023	A 49-year-old woman was evaluated in the emergency department of this hospital after being found unconscious at work. At approximately 4:30 p.m. on the day of this evaluation, the patient was found unconscious on the floor next to a copy machine at work. Emergency medical services were activated and found the patient to be confused and aphasic; she could say only “yes” and “no.” There was no evid…	Differential Diagnosis Dr. Kori S. Zachrison: This 49-year-old woman with hypertension was found unconscious next to a copy machine after coworkers had observed that she looked “unwell” earlier in the day. An examination in the emergency department was notable for aphasia and difficulty with coordination testing. From the perspective of the evaluating emergency physician, there are two equally im…	Thrombotic Thrombocytopenic Purpura (TTP):	Please read the following case, and provide a thorough and specific list of differential diagnosis for the underlying cause of this presentation. Please list the diagnosis that most explains all the features of the presentation first, and include rare diagnoses if they are the best explanation for the presentation. "A 49-year-old woman was evaluated in the emergency department of this hospital af…	1. Thrombotic thrombocytopenic purpura (TTP) 2. Acute disseminated encephalomyelitis (ADEM) 3. Acute ischemic stroke 4. Migraine with aura 5. Encephalitis 6. Hypertensive encephalopathy 7. Multiple sclerosis 8. Systemic lupus erythematosus (SLE) 9. Central nervous system vasculitis 10. Antiphospholipid syndrome Rare diagnoses: - Carbon monoxide poisoning - Wilson's disease - Thiamine deficiency (…	1	1	13	1. Thrombotic thrombocytopenic purpura (TTP) - TTP is characterized by microangiopathic hemolytic anemia, thrombocytopenia, fever, neurological symptoms (such as confusion and aphasia), and renal abnormalities. It is a rare but life-threatening condition that could explain the patient's presentation. 2. Stroke - Although the CT angiography did not show evidence of infarction, embolic or hemorrhag…	1	1	10	1. Thrombotic thrombocytopenic purpura (TTP) - Given the presence of schistocytes on peripheral blood smear, thrombocytopenia, and neurological symptoms such as aphasia, TTP is a likely diagnosis. TTP is a rare but life-threatening disorder characterized by microangiopathic hemolytic anemia, thrombocytopenia, and neurological symptoms. 2. Hemolytic-uremic syndrome (HUS) - HUS is another rare cond…	1	1	12	1. Thrombotic Thrombocytopenic Purpura (TTP) 2. Acute Ischemic Stroke 3. Antiphospholipid Syndrome 4. Hemolytic Uremic Syndrome (HUS) 5. Disseminated Intravascular Coagulation (DIC) 6. Aplastic Anemia 7. Lupus Cerebritis 8. Thrombotic Microangiopathy (TMA) 9. Paroxysmal Nocturnal Hemoglobinuria (PNH) 10. Migraine with Aphasia These differential diagnoses cover a wide range of conditions that coul…	1	1	12	1. Thrombotic Thrombocytopenic Purpura (TTP): The sudden onset of neurologic symptoms (aphasia, confusion), normal CT angiography, normal blood glucose level, and subsequent laboratory findings of schistocytes and thrombocytopenia point towards a diagnosis of TTP - a condition where small blood clots form throughout the body leading to issues like stroke-like symptoms, fatigue, and symptoms from …	1	1	9	1. Thrombotic Thrombocytopenic Purpura (TTP): The sudden onset of neurological symptoms (aphasia) in a woman without a history of neurologic disorders, the lack of evidence of a stroke on imaging, and the presence of schistocytes (fragmented red blood cells) on a peripheral blood smear are highly suggestive of TTP. The absence of many platelets on the blood smear (presumed thrombocytopenia) and t…	1	1	11	1. Thrombotic Thrombocytopenic Purpura (TTP) - This condition typically presents with a pentad of symptoms: thrombocytopenia, microangiopathic hemolytic anemia, renal dysfunction, neurological changes and fever. This patient has thrombocytopenia, neurological changes, and possibly fever. 2. Hemolytic Uremic Syndrome (HUS) - Similar to TTP, this condition presents with hemolysis, renal dysfunction…	1	1	14	1. Thrombotic Thrombocytopenic Purpura (TTP): This disorder is typically characterized by the pentad of thrombocytopenia, hemolytic anemia (with the presence of schistocytes on blood smear), renal insufficiency, neurological abnormalities, and fever. The neurological symptoms can vary greatly, including confusion and aphasia as in this case. This diagnosis could fit the case well, although the fe…	1	1	10		1e-05	Thrombotic Thrombocytopenic Purpura	7041	https://journals.lww.com/nursing/Fulltext/2019/01000/Acquired_autoimmune_thrombotic_thrombocytopenic.8.aspx
Case 35-2023	A 38-year-old woman was evaluated at this hospital because of dyspnea, chest discomfort, and nodules on chest imaging. Three years before the current admission, the patient was evaluated by an orthopedist for pain in the hips and lower back, and glucocorticoid injections were administered. Twenty-two months before the current admission, the patient presented to her primary care physician because …	Differential Diagnosis Dr. Jessica B. McCannon: This 38-year-old woman presented with symptoms involving multiple organ systems that occurred over a period of several years. She had bloody diarrhea, ocular inflammation, lower back and hip pain consistent with sacroiliitis, dactylitis, dyspnea, and pleuritic chest pain, as well as more generalized symptoms including fatigue. Thoracic imaging findi…	Granulomatous lung disease as an extraintestinal manifestation of inflammatory bowel disease.	Please read the following case, and provide a thorough and specific list of differential diagnosis for the underlying cause of this presentation. Please list the diagnosis that most explains all the features of the presentation first, and include rare diagnoses if they are the best explanation for the presentation. "A 38-year-old woman was evaluated at this hospital because of dyspnea, chest disc…	1. Granulomatosis with Polyangiitis (Wegener's Granulomatosis) 2. Sarcoidosis 3. Lymphangitic Carcinomatosis 4. Hypersensitivity Pneumonitis 5. Pulmonary Langerhans Cell Histiocytosis 6. Goodpasture Syndrome 7. Eosinophilic Granulomatosis with Polyangiitis (Churg-Strauss Syndrome) 8. Connective Tissue Disease-associated Interstitial Lung Disease 9. Lymphoproliferative Disorder 10. Idiopathic Pulm…	0		10	Given the presentation of a 38-year-old woman with dyspnea, chest discomfort, nodules on chest imaging, diarrhea, bloody diarrhea, hip and lower back pain, pulmonary nodules, pleural effusions, kidney stones, pruritus in the right eye, weight gain, rash, Raynaud's phenomenon, joint stiffness and pain, and swelling of the fingers, the following differential diagnosis can be considered: 1. Granulom…	1	7	9	1. Granulomatosis with polyangiitis (Wegener's granulomatosis) 2. Relapsing polychondritis 3. Sarcoidosis 4. Lymphangioleiomyomatosis 5. Langerhans cell histiocytosis 6. Hypersensitivity pneumonitis 7. Churg-Strauss syndrome 8. Behçet's disease 9. Rheumatoid lung disease 10. Pulmonary lymphangiomatosis These are the possible differential diagnoses to consider based on the symptoms and findings de…	0		10	1. Multifocal Pneumonia - Given the presentation of progressive dyspnea, chest discomfort, pleuritic pain, and bilateral pleural effusions, multifocal pneumonia remains a top consideration as it can explain the chest imaging findings and respiratory symptoms. 2. Sarcoidosis - Considering the presence of bilateral solid lung nodules, ground-glass opacities, pleural effusion, and systemic symptoms …	0		12	1. Sarcoidosis: This disease often presents with joint pain and erythema nodosum which can cause erythematous, nodular rash. These patients often have lung nodules, lymphadenopathy, and might have uveitis (eye redness and irritation). 2. Pneumonia: The patient's unresolved lower respiratory symptoms, chest discomfort, and CT findings suggestive of pneumonia indicate this could be an explanation f…	1	13	18	1. Sarcoidosis: The patient’s dyspnea, fatigue, joint aches, skin rashes, eye inflammation, along with pulmonary nodules and a history of active chronic colitis support the diagnosis of sarcoidosis. Sarcoidosis, a disease involving abnormal collections of inflammatory cells, often affects the lungs, skin, or lymph nodes, but can affect almost any organ. 2. Systemic lupus erythematosus (SLE): The …	0		11	1. Sarcoidosis: This condition is characterized by granulomas and can affect multiple organ systems including lungs, joints, eyes, and gastrointestinal system. The dyspnea, joint pains, eye erythema and swelling, abnormal lung findings, and active chronic colitis could potentially be attributed to this. 2. Rheumatoid Arthritis (RA): Although patients with RA typically present with symmetric joint…	1	10	13	1. Systemic lupus erythematosus (SLE): Symptoms like fatigue, joint pain and swelling, rash, dyspnea, pleuritis and pleural effusion, and Raynaud’s phenomenon can be observed in SLE. However, blood tests did not detect anti–double-stranded DNA antibodies typical for SLE. 2. Sarcoidosis: This condition can cause lung nodules, erythema on the eye, arthralgias, dyspnea, and fatigue. However, the pat…	0		18		5e-06	Granulomatous lung disease of inflammatory bowel disease.	132	https://www.gastrojournal.org/article/S0016-5085(23)05357-X/abstract - 20/100000 incidence of IBD https://www.ncbi.nlm.nih.gov/pmc/articles/PMC9488688/ - occur in < 1% of patients
Case 36-2023	A 19-year-old man was evaluated in the nephrology clinic of this hospital because of kidney cysts. The patient had been well until 3 years before the current presentation, when diffuse abdominal pain, nausea, vomiting, and increased urinary frequency developed. The patient’s mother brought him to the emergency department of this hospital for evaluation. In the emergency department, the patient re…	Differential Diagnosis Dr. Asaf Vivante: This 19-year-old man presented with diabetes, abnormal results of liver-function tests (elevated AST, ALT, ALP, and GGT levels), and kidney cysts. Additional clinical features included a family history of diabetes, mildly elevated blood pressure, proteinuria, and the presence of a hypoplastic pancreas and echogenic kidneys on imaging. I will begin by devel…	HNF1B-related disease consistent with renal cysts and diabetes spectrum disorder.	Please read the following case, and provide a thorough and specific list of differential diagnosis for the underlying cause of this presentation. Please list the diagnosis that most explains all the features of the presentation first, and include rare diagnoses if they are the best explanation for the presentation. "A 19-year-old man was evaluated in the nephrology clinic of this hospital because…	1. Autosomal dominant polycystic kidney disease (ADPKD) 2. Renal tubular acidosis 3. Medullary sponge kidney 4. Amyloidosis 5. Congenital hepatic fibrosis 6. Islet cell tumor of the pancreas 7. Cystic fibrosis 8. Obstructive uropathy 9. Multiple endocrine neoplasia (MEN) syndrome 10. Von Hippel-Lindau disease 11. Bartter syndrome 12. Sjogren's syndrome 13. Fabry disease 14. Lepromatous leprosy 15…	0		15	1. Autosomal Dominant Polycystic Kidney Disease (ADPKD) 2. Medullary Cystic Kidney Disease 3. Multicystic Dysplastic Kidney 4. Von Hippel-Lindau Disease 5. Tuberous Sclerosis 6. Medullary Sponge Kidney 7. Nephronophthisis 8. Bartter Syndrome 9. Alport Syndrome The most likely diagnosis that explains all the features of the presentation is Autosomal Dominant Polycystic Kidney Disease (ADPKD). Othe…	0		9	1. Differential Diagnosis: - Autosomal dominant polycystic kidney disease - Medullary cystic kidney disease - Juvenile nephronophthisis - Bardet-Biedl syndrome - Diabetes insipidus - Hypercalcemia-associated nephrocalcinosis - Multiple endocrine neoplasia type 1 - Renal tubular acidosis - Fabry disease - Medullary sponge kidney - Cystic fibrosis - von Hippel-Lindau syndrome - Hypokalemia-induced …	0		22	1. Differential Diagnosis: Most likely diagnosis: 1. Autosomal Dominant Polycystic Kidney Disease (ADPKD) - Given the bilateral kidney cysts, family history of diabetes, normal growth and development, and absence of other significant symptoms, ADPKD is the most likely diagnosis. Other possible diagnoses: 2. Medullary sponge kidney 3. Multicystic dysplastic kidney 4. Renal cell carcinoma 5. Tuberc…	0		11	1. Type 1 diabetes 2. Cystic fibrosis-related diabetes 3. Maturity-onset diabetes of the young type 5 (MODY 5) 4. Autosomal dominant polycystic kidney disease 5. Von Hippel-Lindau disease 6. Tuberous sclerosis 7. Medullary cystic kidney disease 8. Simple renal cysts associated with chronic kidney disease 9. Liquorice-induced hypokalemic rhabdomyolysis with tubular damage leading to cyst formation.	0		9	1. Mature-Onset Diabetes of the Young (MODY): MODY, particularly HNF1B-MODY, seems to be a plausible option given the presentation. This genetic disorder results in abnormal glucose metabolism and different forms also carry renal cysts and abnormalities in liver enzymes. The pancreatic atrophy seen on imaging could also be associated. This type of diabetes often appears earlier in life and does n…	1	1	8	1. Diabetic nephropathy: High levels of blood glucose can damage the kidneys, and proteinuria is a common symptom. It would also explain the symptoms of polydipsia, polyuria and weight loss due to diabetes mellitus. The presence of kidney cysts isn't typical for diabetic nephropathy, but they could be an independent finding. 2. Autosomal dominant polycystic kidney disease (ADPKD): This genetic di…	0		8	1. Von Hippel-Lindau Disease (VHL): This rare genetic condition is known to cause multiple cysts in kidneys and pancreas and is also associated with pancreatic atrophy which is seen in this patient. 2. Multiple Endocrine Neoplasia type 1 (MEN 1): This condition could cause these cysts. This syndrome causes tumors, or cancers, in a variety of glands. While it doesn't perfectly match this patient's…	1	5	7		5e-06	HNF1B-related disease	23	https://onlinelibrary.wiley.com/doi/full/10.1111/pedi.12959
